# Supplementary material for: Rational design of porous organic molecules (POMs) based on B-heterocyclic carbenes
Source: Royal Society of Chemistry journal article supplement (doi:10.1039/d0me00156b), 2020-12-17
Supplement: d0me00156b1.pdf [file d0me00156b1.pdf]

## Supporting information

# Rational Design of Porous Organic Molecules Based on B-Heterocyclic Carbenes

Congjie Zhang,<sup>\*†</sup> Zeqiong Tian,<sup>†</sup> Wenhong Jia,<sup>†</sup> and Yirong Mo<sup>\*‡</sup>

<sup>†</sup> *Key Laboratory of Macromolecular Science of Shaanxi Province, School of Chemistry & Chemical Engineering, Shaanxi Normal University, Xi'an, 710062, China*

<sup>‡</sup> *Department of Nanoscience, Joint School of Nanoscience and Nanoengineering, University of North Carolina at Greensboro, Greensboro, NC 27401, United States*

### Table of Contents

**Table 1S.** The number of imaginary frequency ( $N_{\text{imag}}$ ), total energy including zero point energy ( $E$ , in Hartree) and relative energy ( $E_R$ , in kcal·mol<sup>-1</sup>) of the blocks at M06-2X/6-311+G\*\* and B3LYP/6-31G\*\* levels.....S2

**Table 2S.** Table 2S First vertical transition energies ( $\lambda$ , in nm) and oscillator strengths ( $f$ ) of POM-n (n=1-36).....S2

**Table 3S.** Table 3S The length (in angstrom) and WBIs of Ag-C( $\equiv$ C), ptC-Ag, ptC-B, ptC-C(CH) and ptC-C bonds **C1-C3** and MOF-BHC-1.....S3

Cartesian coordinates, electronic energy ( $E$ ) and the smallest vibrational frequency ( $\nu$ ) for all the stable molecules calculated at the B3LYP/6-31G\*\* level, as well as cartesian coordinates and electronic energy ( $E$ ) for COFs and MOF calculated at the RLSDA level .....S4

Table 1S The number of imaginary frequency ( $N_{\text{imag}}$ ), energy including zero point energy ( $E$ , in Hartree) and relative energy ( $E_{\text{R}}$ , in kcal·mol<sup>-1</sup>) of the blocks at M06-2X/6-311+G\*\* and B3LYP/6-31G\*\* levels.

| Motifs      | $N_{\text{imag}}^{\text{a)}$ | $E^{\text{a)}$ | $E_{\text{R}}^{\text{a)}$ | $N_{\text{imag}}^{\text{b)}$ | $E^{\text{b)}$ | $E_{\text{R}}^{\text{b)}$ |
|-------------|------------------------------|----------------|---------------------------|------------------------------|----------------|---------------------------|
| <b>B1-p</b> | 0                            | -445.38828     | 0.0                       | 0                            | -445.45518     | 0.0                       |
| <b>B1-c</b> | 3                            | -445.37266     | 9.8                       | 3                            | -445.44046     | 9.2                       |
| <b>B2-p</b> | 0                            | -673.88129     | 0.0                       | 0                            | -673.98508     | 0.0                       |
| <b>B2-c</b> | 3                            | -673.87592     | 3.4                       | 3                            | -673.97991     | 3.2                       |
| <b>B3-p</b> | 0                            | -902.28758     | 0.0                       | 0                            | -902.43311     | 0.0                       |
| <b>B3-c</b> | 3                            | -902.28506     | 1.6                       | 3                            | -902.43021     | 1.8                       |
| <b>B4-p</b> | 0                            | -305.77912     | 0.0                       | 0                            | -305.83139     | 0.0                       |
| <b>B4-c</b> | 2                            | -305.76918     | 6.2                       | 2                            | -305.82253     | 5.6                       |
| <b>B5-p</b> | 0                            | -458.11218     | 0.0                       | 0                            | -458.18976     | 0.0                       |
| <b>B5-c</b> | 2                            | -458.10814     | 2.5                       | 2                            | -458.18538     | 2.7                       |
| <b>B6-p</b> | 0                            | -610.38293     | 0.0                       | 0                            | -610.48844     | 0.0                       |
| <b>B6-c</b> | 2                            | -610.38111     | 1.1                       | 2                            | -610.48602     | 1.5                       |

a) M06-2X/6-311+G\*\*, b) B3LYP/6-31G\*\*

Table 2S First vertical transition energies ( $\lambda$ , in nm) and oscillator strengths ( $f$ ) of POM-n (n=1-36).

| n  | transition                                                 | $\lambda$ | $f$    | n  | transition                                                 | $\lambda$ | $f$    |
|----|------------------------------------------------------------|-----------|--------|----|------------------------------------------------------------|-----------|--------|
| 1  | <sup>1</sup> A <sub>g</sub> → <sup>1</sup> B <sub>1u</sub> | 325.03    | 0.1113 | 19 | <sup>1</sup> A <sub>g</sub> → <sup>1</sup> B <sub>1u</sub> | 319.31    | 0.0088 |
| 2  | <sup>1</sup> A <sub>1</sub> → <sup>1</sup> A <sub>1</sub>  | 341.73    | 0.0243 | 20 | <sup>1</sup> A <sub>1</sub> → <sup>1</sup> A <sub>1</sub>  | 339.19    | 0.0351 |
| 3  | <sup>1</sup> A <sub>g</sub> → <sup>1</sup> B <sub>u</sub>  | 338.45    | 0.1806 | 21 | <sup>1</sup> A <sub>g</sub> → <sup>1</sup> A <sub>u</sub>  | 337.56    | 0.0023 |
| 4  | <sup>1</sup> A <sub>1</sub> → <sup>1</sup> A <sub>1</sub>  | 348.69    | 0.0014 | 22 | <sup>1</sup> A <sub>1</sub> → <sup>1</sup> A <sub>1</sub>  | 348.40    | 0.0009 |
| 5  | <sup>1</sup> A <sub>g</sub> → <sup>1</sup> B <sub>u</sub>  | 346.53    | 0.0306 | 23 | <sup>1</sup> A <sub>g</sub> → <sup>1</sup> B <sub>u</sub>  | 345.96    | 0.0309 |
| 6  | <sup>1</sup> A <sub>1</sub> '→ <sup>1</sup> E'             | 353.18    | 0.1157 | 24 | <sup>1</sup> A <sub>1</sub> '→ <sup>1</sup> E'             | 351.40    | 0.1179 |
| 7  | <sup>1</sup> A <sub>g</sub> → <sup>1</sup> B <sub>3u</sub> | 368.06    | 0.5133 | 25 | <sup>1</sup> A <sub>g</sub> → <sup>1</sup> B <sub>2u</sub> | 349.67    | 0.2730 |
| 8  | <sup>1</sup> A <sub>1</sub> → <sup>1</sup> A <sub>1</sub>  | 398.33    | 0.0668 | 26 | <sup>1</sup> A <sub>1</sub> → <sup>1</sup> A <sub>1</sub>  | 396.36    | 0.0858 |
| 9  | <sup>1</sup> A <sub>g</sub> → <sup>1</sup> B <sub>u</sub>  | 396.02    | 0.2142 | 27 | <sup>1</sup> A <sub>g</sub> → <sup>1</sup> B <sub>u</sub>  | 394.50    | 0.2768 |
| 10 | <sup>1</sup> A <sub>1</sub> → <sup>1</sup> A <sub>1</sub>  | 402.70    | 0.0043 | 28 | <sup>1</sup> A <sub>1</sub> → <sup>1</sup> A <sub>1</sub>  | 402.42    | 0.0020 |
| 11 | <sup>1</sup> A <sub>g</sub> → <sup>1</sup> B <sub>u</sub>  | 401.23    | 0.0493 | 29 | <sup>1</sup> A <sub>g</sub> → <sup>1</sup> B <sub>u</sub>  | 400.63    | 0.0420 |
| 12 | <sup>1</sup> A <sub>1</sub> '→ <sup>1</sup> E'             | 409.89    | 0.2282 | 30 | <sup>1</sup> A <sub>1</sub> '→ <sup>1</sup> E'             | 408.81    | 0.2190 |
| 13 | <sup>1</sup> A <sub>g</sub> → <sup>1</sup> B <sub>3u</sub> | 441.00    | 0.6497 | 31 | <sup>1</sup> A <sub>g</sub> → <sup>1</sup> B <sub>3u</sub> | 413.47    | 0.3891 |
| 14 | <sup>1</sup> A <sub>1</sub> → <sup>1</sup> A <sub>1</sub>  | 470.82    | 0.1136 | 32 | <sup>1</sup> A <sub>1</sub> → <sup>1</sup> A <sub>1</sub>  | 468.78    | 0.1546 |
| 15 | <sup>1</sup> A <sub>g</sub> → <sup>1</sup> B <sub>u</sub>  | 469.86    | 0.3237 | 33 | <sup>1</sup> A <sub>g</sub> → <sup>1</sup> B <sub>u</sub>  | 467.24    | 0.4303 |
| 16 | <sup>1</sup> A <sub>1</sub> → <sup>1</sup> A <sub>1</sub>  | 473.94    | 0.0098 | 34 | <sup>1</sup> A <sub>1</sub> → <sup>1</sup> A <sub>1</sub>  | 473.58    | 0.0044 |
| 17 | <sup>1</sup> A <sub>g</sub> → <sup>1</sup> B <sub>u</sub>  | 472.70    | 0.0774 | 35 | <sup>1</sup> A <sub>g</sub> → <sup>1</sup> B <sub>u</sub>  | 471.99    | 0.0611 |
| 18 | <sup>1</sup> A <sub>1</sub> '→ <sup>1</sup> E'             | 487.86    | 0.3256 | 36 | <sup>1</sup> A <sub>1</sub> '→ <sup>1</sup> E'             | 481.60    | 0.3212 |

Table 3S The length (in angstrom) and WBIs of Ag-C( $\equiv$ C), ptC-Ag, ptC-B, ptC-C(CH) and ptC-C bonds **C1-C3** and MOF-BHC-1.

| Species   | Ag-C( $\equiv$ C) | ptC-Ag     | ptC-B | ptC-C(CH) | ptC-C      |
|-----------|-------------------|------------|-------|-----------|------------|
|           | Bond length       |            |       |           |            |
| <b>C1</b> | 2.01              | 2.11       | 1.52  | 1.54      | 1.47       |
| <b>C2</b> | 2.01              | 2.11       | 1.52  | 1.54      | 1.47       |
| <b>C3</b> | 2.01              | 2.11       | 1.52  | 1.54      | 1.47       |
| MOF-BHC-1 | 1.95              | 2.00, 2.01 | 1.53  | 1.50, .53 | 1.45, 1.46 |
|           | WBIs              |            |       |           |            |
| <b>C1</b> | 0.73              | 0.31       | 0.94  | 0.87      | 1.26       |
| <b>C2</b> | 0.73              | 0.31       | 0.94  | 0.87      | 1.26       |
| <b>C3</b> | 0.73              | 0.31       | 0.94  | 0.87      | 1.26       |

**Cartesian coordinates, electronic energy (E) and the smallest vibrational frequency ( $\nu$ ) for all the stable molecules calculated at the B3LYP/6-31G\*\* level, as well as cartesian coordinates and electronic energy (E) for COFs and MOF calculated at the RLSDA level.**

**B1-p**

E= -445.5803624  
 $\nu$ = 43.2490

|   |           |           |           |
|---|-----------|-----------|-----------|
| B | 0.000000  | 0.000000  | 0.000000  |
| B | 0.000000  | 1.660687  | 0.000000  |
| B | 1.438197  | -0.830344 | 0.000000  |
| B | -1.438197 | -0.830344 | 0.000000  |
| C | 0.000000  | 2.930276  | 0.730230  |
| C | 0.000000  | 2.930276  | -0.730230 |
| C | 2.537693  | -1.465138 | 0.730230  |
| C | 2.537693  | -1.465138 | -0.730230 |
| C | -2.537693 | -1.465138 | 0.730230  |
| C | -2.537693 | -1.465138 | -0.730230 |
| C | 3.647307  | -2.105774 | 0.000000  |
| H | 4.622897  | -1.617944 | 0.000000  |
| H | 3.712629  | -3.194574 | 0.000000  |
| C | 0.000000  | 4.211547  | 0.000000  |
| H | 0.910268  | 4.812518  | 0.000000  |
| H | -0.910268 | 4.812518  | 0.000000  |
| C | -3.647307 | -2.105774 | 0.000000  |
| H | -4.622897 | -1.617944 | 0.000000  |
| H | -3.712629 | -3.194574 | 0.000000  |

**B2-p**

E= -674.141038901  
 $\nu$ = 20.1920

|   |           |           |           |
|---|-----------|-----------|-----------|
| B | 3.665846  | -2.116477 | 0.000000  |
| B | -3.665846 | -2.116477 | 0.000000  |
| B | 0.000000  | 4.232954  | 0.000000  |
| C | -5.859452 | -3.382956 | 0.000000  |
| H | -5.924528 | -4.471732 | 0.000000  |
| C | 5.859452  | -3.382956 | 0.000000  |
| H | 6.834897  | -2.894926 | 0.000000  |
| H | 5.924528  | -4.471732 | 0.000000  |
| C | 0.000000  | 6.765913  | 0.000000  |
| H | 0.910370  | 7.366658  | 0.000000  |
| B | 0.000000  | 0.000000  | 0.000000  |
| C | 0.000000  | 1.515822  | 0.000000  |
| C | 0.000000  | 2.740170  | 0.000000  |
| C | -1.312740 | -0.757911 | 0.000000  |
| C | -2.373057 | -1.370085 | 0.000000  |
| C | 1.312740  | -0.757911 | 0.000000  |
| C | 2.373057  | -1.370085 | 0.000000  |
| C | 0.000000  | 5.490183  | 0.737475  |
| C | 0.000000  | 5.490183  | -0.737475 |
| C | 4.754638  | -2.745092 | 0.737475  |
| C | 4.754638  | -2.745092 | -0.737475 |
| C | -4.754638 | -2.745092 | 0.737475  |
| C | -4.754638 | -2.745092 | -0.737475 |
| H | -6.834897 | -2.894926 | 0.000000  |
| H | -0.910370 | 7.366658  | 0.000000  |

**B3-p**

E= -902.620828951  
 $\nu$ = 11.5592

|   |           |           |          |
|---|-----------|-----------|----------|
| B | 5.897290  | -3.404802 | 0.000000 |
| B | -5.897290 | -3.404802 | 0.000000 |
| B | 0.000000  | 6.809604  | 0.000000 |
| C | -8.090980 | -4.671330 | 0.000000 |

|   |           |           |           |
|---|-----------|-----------|-----------|
| H | -8.155415 | -5.759987 | 0.000000  |
| C | 8.090980  | -4.671330 | 0.000000  |
| H | 9.066003  | -4.182803 | 0.000000  |
| H | 8.155415  | -5.759987 | 0.000000  |
| C | 0.000000  | 9.342659  | 0.000000  |
| H | 0.910588  | 9.942790  | 0.000000  |
| B | 0.000000  | 0.000000  | 0.000000  |
| C | 0.000000  | 1.512200  | 0.000000  |
| C | -1.309604 | -0.756100 | 0.000000  |
| C | 1.309604  | -0.756100 | 0.000000  |
| C | 0.000000  | 8.067148  | 0.737726  |
| C | 0.000000  | 8.067148  | -0.737726 |
| C | 6.986355  | -4.033574 | 0.737726  |
| C | 6.986355  | -4.033574 | -0.737726 |
| C | -6.986355 | -4.033574 | 0.737726  |
| C | -6.986355 | -4.033574 | -0.737726 |
| H | -9.066003 | -4.182803 | 0.000000  |
| H | -0.910588 | 9.942790  | 0.000000  |
| C | 0.000000  | 2.740024  | 0.000000  |
| C | 0.000000  | 4.095100  | 0.000000  |
| C | -2.372930 | -1.370012 | 0.000000  |
| C | -3.546461 | -2.047550 | 0.000000  |
| C | -4.607360 | -2.660060 | 0.000000  |
| C | 2.372930  | -1.370012 | 0.000000  |
| C | 3.546461  | -2.047550 | 0.000000  |
| C | 4.607360  | -2.660060 | 0.000000  |
| C | 0.000000  | 5.320121  | 0.000000  |

**B4-p**

E= -305.9241371  
 $\nu$ = 50.6904

|   |           |           |           |
|---|-----------|-----------|-----------|
| B | 0.000000  | 0.000000  | 1.312708  |
| B | 0.000000  | 1.462306  | 0.523265  |
| B | 0.000000  | -1.462306 | 0.523265  |
| C | 0.730550  | 2.577211  | -0.084868 |
| C | -0.730550 | 2.577211  | -0.084868 |
| C | 0.730550  | -2.577211 | -0.084868 |
| C | -0.730550 | -2.577211 | -0.084868 |
| C | 0.000000  | -3.703429 | -0.695274 |
| H | 0.000000  | -3.797900 | -1.781744 |
| H | 0.000000  | -4.665345 | -0.181415 |
| C | 0.000000  | 3.703429  | -0.695274 |
| H | 0.000000  | 3.797900  | -1.781744 |
| H | 0.000000  | 4.665345  | -0.181415 |
| H | 0.000000  | 0.000000  | 2.510263  |

**B5-p**

E= -458.303480955  
 $\nu$ = 23.2523

|   |          |           |           |
|---|----------|-----------|-----------|
| B | 0.000000 | -3.714009 | -0.033243 |
| B | 0.000000 | 3.714009  | -0.033243 |
| C | 0.000000 | -5.950299 | -1.223931 |
| H | 0.000000 | -6.052933 | -2.309668 |
| H | 0.000000 | -6.908463 | -0.703082 |
| C | 0.000000 | 5.950299  | -1.223931 |
| H | 0.000000 | 6.052933  | -2.309668 |
| B | 0.000000 | 0.000000  | 1.979242  |
| C | 0.000000 | 1.315554  | 1.244129  |
| C | 0.000000 | 2.397801  | 0.668952  |

|   |           |           |           |
|---|-----------|-----------|-----------|
| C | 0.000000  | -1.315554 | 1.244129  |
| C | 0.000000  | -2.397801 | 0.668952  |
| C | 0.737038  | 4.824117  | -0.624225 |
| C | -0.737038 | 4.824117  | -0.624225 |
| C | 0.737038  | -4.824117 | -0.624225 |
| C | -0.737038 | -4.824117 | -0.624225 |
| H | 0.000000  | 6.908463  | -0.703082 |
| H | 0.000000  | 0.000000  | 3.173342  |

**B6-p**

E= -610.623390720

v= 13.2586

|   |           |            |           |
|---|-----------|------------|-----------|
| B | 0.000000  | 5.980442   | -0.606112 |
| B | 0.000000  | -5.980442  | -0.606112 |
| C | 0.000000  | -8.214217  | -1.799457 |
| H | 0.000000  | -8.315597  | -2.885341 |
| C | 0.000000  | 8.214217   | -1.799457 |
| H | 0.000000  | 9.173138   | -1.279941 |
| H | 0.000000  | 8.315597   | -2.885341 |
| B | 0.000000  | 0.000000   | 2.631165  |
| C | 0.000000  | -1.310274  | 1.895159  |
| C | 0.000000  | 1.310274   | 1.895159  |
| C | 0.738047  | 7.089451   | -1.198662 |
| C | -0.738047 | 7.089451   | -1.198662 |
| C | 0.738047  | -7.089451  | -1.198662 |
| C | -0.738047 | -7.089451  | -1.198662 |
| H | 0.000000  | -9.173138  | -1.279941 |
| C | 0.000000  | -2.393737  | 1.314718  |
| C | 0.000000  | -3.587292  | 0.674773  |
| C | 0.000000  | -4.667374  | 0.096306  |
| C | 0.000000  | 2.393737   | 1.314718  |
| C | 0.000000  | 3.587292   | 0.674773  |
| C | 0.000000  | 4.667374   | 0.096306  |
| H | 0.000000  | 0.0000 800 | 3.825751  |

**POM-1**

E= -1041.04250763

v= 15.3774

|   |           |           |           |
|---|-----------|-----------|-----------|
| B | -4.327802 | 0.000000  | 0.000000  |
| B | -3.463710 | 1.417158  | 0.000000  |
| B | -5.986824 | 0.000000  | 0.000000  |
| B | -3.463710 | -1.417158 | 0.000000  |
| C | -8.536220 | 0.000000  | 0.000000  |
| H | -9.136616 | 0.910265  | 0.000000  |
| H | -9.136616 | -0.910265 | 0.000000  |
| C | -2.052468 | 3.556534  | 0.000000  |
| H | -2.503459 | 4.550893  | 0.000000  |
| C | -2.052468 | -3.556534 | 0.000000  |
| H | -2.503459 | -4.550893 | 0.000000  |
| B | 4.327802  | 0.000000  | 0.000000  |
| B | 3.463710  | 1.417158  | 0.000000  |
| B | 3.463710  | -1.417158 | 0.000000  |
| B | 5.986824  | 0.000000  | 0.000000  |
| C | 2.052468  | -3.556534 | 0.000000  |
| H | 2.503459  | -4.550893 | 0.000000  |
| C | 2.052468  | 3.556534  | 0.000000  |
| H | 2.503459  | 4.550893  | 0.000000  |
| C | 8.536220  | 0.000000  | 0.000000  |
| H | 9.136616  | 0.910265  | 0.000000  |
| H | 9.136616  | -0.910265 | 0.000000  |
| C | -0.604853 | 3.574458  | 0.000000  |
| C | 0.604853  | 3.574458  | 0.000000  |
| C | -0.604853 | -3.574458 | 0.000000  |
| C | 0.604853  | -3.574458 | 0.000000  |
| C | -2.781233 | -2.489183 | 0.729459  |
| C | -2.781233 | -2.489183 | -0.729459 |
| C | 2.781233  | -2.489183 | 0.729459  |
| C | 2.781233  | -2.489183 | -0.729459 |
| C | 2.781233  | 2.489183  | 0.729459  |

|   |           |          |           |
|---|-----------|----------|-----------|
| C | 2.781233  | 2.489183 | -0.729459 |
| C | -2.781233 | 2.489183 | 0.729459  |
| C | -2.781233 | 2.489183 | -0.729459 |
| C | -7.255134 | 0.000000 | 0.730637  |
| C | -7.255134 | 0.000000 | -0.730637 |
| C | 7.255134  | 0.000000 | 0.730637  |
| C | 7.255134  | 0.000000 | -0.730637 |

**POM-2**

E= -1636.50045157

v= 9.6977

|   |           |            |           |
|---|-----------|------------|-----------|
| B | 0.000000  | 0.000000   | -2.909626 |
| B | 0.000000  | 0.000000   | -1.250236 |
| B | 0.000000  | 1.461449   | -3.691758 |
| B | 0.000000  | -1.461449  | -3.691758 |
| C | 0.000000  | 3.776985   | -4.788095 |
| H | 0.000000  | 3.910510   | -5.871614 |
| C | 0.000000  | 0.000000   | 1.324163  |
| C | 0.000000  | -3.776985  | -4.788095 |
| H | 0.000000  | -3.910510  | -5.871614 |
| B | 0.000000  | -7.305091  | 1.601363  |
| B | 0.000000  | -5.827534  | 2.357971  |
| B | 0.000000  | -7.319969  | -0.058428 |
| C | 0.000000  | -8.716442  | 2.473779  |
| B | 0.000000  | -3.512926  | 3.458266  |
| H | 0.000000  | -3.383771  | 4.542423  |
| C | 0.000000  | -10.884778 | 3.814156  |
| H | 0.000000  | -10.916970 | 4.904115  |
| C | 0.000000  | -1.226652  | 2.104657  |
| C | 0.000000  | -2.263649  | 2.726309  |
| C | 0.000000  | -5.019571  | -4.045407 |
| C | 0.000000  | -6.045638  | -3.404662 |
| B | 0.000000  | 7.305091   | 1.601363  |
| B | 0.000000  | 8.716442   | 2.473779  |
| B | 0.000000  | 5.827534   | 2.357971  |
| B | 0.000000  | 7.319969   | -0.058428 |
| C | 0.000000  | 3.512926   | 3.458266  |
| H | 0.000000  | 3.383771   | 4.542423  |
| C | 0.000000  | 10.884778  | 3.814156  |
| H | 0.000000  | 10.916970  | 4.904115  |
| H | 0.000000  | 11.874126  | 3.355569  |
| C | 0.000000  | 7.262763   | -2.620732 |
| H | 0.000000  | 8.173237   | -3.223287 |
| C | 0.000000  | 6.045638   | -3.404662 |
| C | 0.000000  | 2.263649   | 2.726309  |
| C | 0.000000  | 1.226652   | 2.104657  |
| C | 0.000000  | 5.019571   | -4.045407 |
| C | 0.730623  | 9.795125   | 3.140591  |
| C | -0.730623 | 9.795125   | 3.140591  |
| C | -0.729461 | 7.312496   | -1.329242 |
| C | 0.729461  | 7.312496   | -1.329242 |
| C | -0.729726 | 2.599153   | -4.255937 |
| C | 0.729726  | 2.599153   | -4.255937 |
| C | -0.729395 | 4.687749   | 2.920604  |
| C | 0.729395  | 4.687749   | 2.920604  |
| C | -0.729383 | 0.000000   | 0.021031  |
| C | 0.729383  | 0.000000   | 0.021031  |
| C | -0.729395 | -4.687749  | 2.920604  |
| C | 0.729395  | -4.687749  | 2.920604  |
| C | 0.729726  | -2.599153  | -4.255937 |
| C | -0.729726 | -2.599153  | -4.255937 |
| C | 0.729461  | -7.312496  | -1.329242 |
| C | -0.729461 | -7.312496  | -1.329242 |
| C | -0.730623 | -9.795125  | 3.140591  |
| C | 0.730623  | -9.795125  | 3.140591  |
| H | 0.000000  | -11.874126 | 3.355569  |
| C | 0.000000  | -7.262763  | -2.620732 |
| H | 0.000000  | -8.173237  | -3.223287 |

**POM-3**

E= -2231.95834981

v= 4.7579

|   |           |            |           |
|---|-----------|------------|-----------|
| B | -2.638232 | 3.344956   | 0.000000  |
| B | -0.990580 | 3.540954   | 0.000000  |
| B | -3.588622 | 4.703307   | 0.000000  |
| B | -3.252436 | 1.804982   | 0.000000  |
| C | -4.956661 | 6.869261   | 0.000000  |
| H | -6.048357 | 6.871430   | 0.000000  |
| C | 1.565253  | 3.850906   | 0.000000  |
| C | -4.097470 | -0.613429  | 0.000000  |
| H | -5.160429 | -0.862286  | 0.000000  |
| B | 2.638232  | -3.344956  | 0.000000  |
| B | 3.252436  | -1.804982  | 0.000000  |
| B | 0.990580  | -3.540954  | 0.000000  |
| B | 3.588622  | -4.703307  | 0.000000  |
| C | -1.565253 | -3.850906  | 0.000000  |
| C | 4.097470  | 0.613429   | 0.000000  |
| H | 5.160429  | 0.862286   | 0.000000  |
| C | 4.956661  | -6.869261  | 0.000000  |
| H | 6.048357  | -6.871430  | 0.000000  |
| C | 2.487442  | 2.726795   | 0.000000  |
| C | 3.228179  | 1.771233   | 0.000000  |
| C | -3.228179 | -1.771233  | 0.000000  |
| C | -2.487442 | -2.726795  | 0.000000  |
| B | -0.964148 | -11.135069 | 0.000000  |
| B | 0.685486  | -10.951496 | 0.000000  |
| B | -1.660064 | -12.641374 | 0.000000  |
| B | -1.893260 | -9.759491  | 0.000000  |
| C | -2.727623 | -14.956100 | 0.000000  |
| H | -2.152648 | -15.882656 | 0.000000  |
| H | -3.805654 | -15.120281 | 0.000000  |
| C | 3.222750  | -10.589613 | 0.000000  |
| H | 3.929483  | -11.421838 | 0.000000  |
| C | -3.263719 | -7.593868  | 0.000000  |
| H | -4.355534 | -7.594872  | 0.000000  |
| C | -2.192962 | -5.162168  | 0.000000  |
| C | 4.368539  | -8.191932  | 0.000000  |
| C | 3.856005  | -9.287685  | 0.000000  |
| C | -2.685893 | -6.266177  | 0.000000  |
| C | -2.191106 | -13.792876 | 0.730684  |
| C | -2.191106 | -13.792876 | -0.730684 |
| B | 0.964148  | 11.135069  | 0.000000  |
| B | 1.660064  | 12.641374  | 0.000000  |
| B | 1.893260  | 9.759491   | 0.000000  |
| B | -0.685486 | 10.951496  | 0.000000  |
| C | 3.263719  | 7.593868   | 0.000000  |
| H | 4.355534  | 7.594872   | 0.000000  |
| C | 2.727623  | 14.956100  | 0.000000  |
| H | 3.805654  | 15.120281  | 0.000000  |
| H | 2.152648  | 15.882656  | 0.000000  |
| C | -3.222750 | 10.589613  | 0.000000  |
| H | -3.929483 | 11.421838  | 0.000000  |
| C | -3.856005 | 9.287685   | 0.000000  |
| C | 2.685893  | 6.266177   | 0.000000  |
| C | 2.192962  | 5.162168   | 0.000000  |
| C | -4.368539 | 8.191932   | 0.000000  |
| C | 2.191106  | 13.792876  | -0.730684 |
| C | 2.191106  | 13.792876  | 0.730684  |
| C | -1.946343 | 10.792457  | 0.729464  |
| C | -1.946343 | 10.792457  | -0.729464 |
| C | -4.286801 | 5.763849   | 0.729778  |
| C | -4.286801 | 5.763849   | -0.729778 |
| C | 2.589473  | 8.695947   | 0.729385  |
| C | 2.589473  | 8.695947   | -0.729385 |
| C | 0.271551  | 3.693631   | 0.729326  |
| C | 0.271551  | 3.693631   | -0.729326 |
| C | 3.692302  | -0.613409  | 0.729688  |
| C | 3.692302  | -0.613409  | -0.729688 |

|   |           |            |           |
|---|-----------|------------|-----------|
| C | -3.692302 | 0.613409   | -0.729688 |
| C | -3.692302 | 0.613409   | 0.729688  |
| C | -2.589473 | -8.695947  | 0.729385  |
| C | -2.589473 | -8.695947  | -0.729385 |
| C | -0.271551 | -3.693631  | -0.729326 |
| C | -0.271551 | -3.693631  | 0.729326  |
| C | 4.286801  | -5.763849  | 0.729778  |
| C | 4.286801  | -5.763849  | -0.729778 |
| C | 1.946343  | -10.792457 | 0.729464  |
| C | 1.946343  | -10.792457 | -0.729464 |

**POM-4**

E= -2827.41622465

v= 3.5052

|   |           |            |           |
|---|-----------|------------|-----------|
| B | 0.000000  | 7.273886   | 2.622740  |
| B | 0.000000  | 7.271962   | 0.963439  |
| B | 0.000000  | 8.736709   | 3.402749  |
| B | 0.000000  | 5.818045   | 3.415945  |
| C | 0.000000  | 11.052131  | 4.498854  |
| H | 0.000000  | 11.185502  | 5.582395  |
| C | 0.000000  | 7.275306   | -1.611069 |
| C | 0.000000  | 3.517624   | 4.543420  |
| H | 0.000000  | 3.397763   | 5.628522  |
| B | 0.000000  | 0.000000   | -1.816355 |
| B | 0.000000  | 1.457237   | -2.607388 |
| B | 0.000000  | 0.000000   | -0.157042 |
| B | 0.000000  | -1.457237  | -2.607388 |
| C | 0.000000  | 0.000000   | 2.417583  |
| C | 0.000000  | 3.757023   | -3.735778 |
| H | 0.000000  | 3.875906   | -4.820980 |
| C | 0.000000  | -3.757023  | -3.735778 |
| H | 0.000000  | -3.875906  | -4.820980 |
| C | 0.000000  | 6.048708   | -2.391854 |
| C | 0.000000  | 5.011072   | -3.012402 |
| C | 0.000000  | 2.263936   | 3.819150  |
| C | 0.000000  | 1.226714   | 3.197904  |
| B | 0.000000  | -7.273886  | 2.622740  |
| B | 0.000000  | -7.271962  | 0.963439  |
| B | 0.000000  | -8.736709  | 3.402749  |
| B | 0.000000  | -5.818045  | 3.415945  |
| C | 0.000000  | -11.052131 | 4.498854  |
| H | 0.000000  | -11.185502 | 5.582395  |
| C | 0.000000  | -7.275306  | -1.611069 |
| C | 0.000000  | -3.517624  | 4.543420  |
| H | 0.000000  | -3.397763  | 5.628522  |
| C | 0.000000  | -1.226714  | 3.197904  |
| C | 0.000000  | -5.011072  | -3.012402 |
| C | 0.000000  | -6.048708  | -2.391854 |
| C | 0.000000  | -2.263936  | 3.819150  |
| C | 0.729793  | -9.874163  | 3.966890  |
| C | -0.729793 | -9.874163  | 3.966890  |
| B | 0.000000  | 14.580506  | -1.889471 |
| B | 0.000000  | 15.991381  | -2.762719 |
| B | 0.000000  | 13.102853  | -2.645914 |
| B | 0.000000  | 14.596038  | -0.229728 |
| C | 0.000000  | 10.787918  | -3.745517 |
| H | 0.000000  | 10.658069  | -4.829599 |
| C | 0.000000  | 18.158748  | -4.104453 |
| H | 0.000000  | 18.190458  | -5.194441 |
| H | 0.000000  | 19.148384  | -3.646504 |
| C | 0.000000  | 14.538482  | 2.332560  |
| H | 0.000000  | 15.448730  | 2.935461  |
| C | 0.000000  | 13.320935  | 3.115901  |
| C | 0.000000  | 9.538945   | -3.012907 |
| C | 0.000000  | 8.502154   | -2.390921 |
| C | 0.000000  | 12.294620  | 3.756241  |
| C | -0.730671 | 17.069462  | -3.430323 |
| C | 0.730671  | 17.069462  | -3.430323 |
| C | 0.729469  | 14.588440  | 1.041105  |

|   |           |            |           |
|---|-----------|------------|-----------|
| C | -0.729469 | 14.588440  | 1.041105  |
| C | 0.729793  | 9.874163   | 3.966890  |
| C | -0.729793 | 9.874163   | 3.966890  |
| C | 0.729383  | 11.962838  | -3.208256 |
| C | -0.729383 | 11.962838  | -3.208256 |
| C | 0.729353  | 7.273494   | -0.307867 |
| C | -0.729353 | 7.273494   | -0.307867 |
| C | 0.729698  | 2.587716   | -3.186072 |
| C | -0.729698 | 2.587716   | -3.186072 |
| C | -0.729631 | 4.687095   | 3.994267  |
| C | 0.729631  | 4.687095   | 3.994267  |
| C | -0.729631 | -4.687095  | 3.994267  |
| C | -0.729335 | 0.000000   | 1.114321  |
| C | 0.729335  | 0.000000   | 1.114321  |
| C | 0.729698  | -2.587716  | -3.186072 |
| C | -0.729698 | -2.587716  | -3.186072 |
| C | 0.729353  | -7.273494  | -0.307867 |
| C | -0.729353 | -7.273494  | -0.307867 |
| B | 0.000000  | -14.580506 | -1.889471 |
| B | 0.000000  | -13.102853 | -2.645914 |
| B | 0.000000  | -14.596038 | -0.229728 |
| B | 0.000000  | -15.991381 | -2.762719 |
| C | 0.000000  | -14.538482 | 2.332560  |
| C | 0.000000  | -10.787918 | -3.745517 |
| H | 0.000000  | -10.658069 | -4.829599 |
| C | 0.000000  | -18.158748 | -4.104453 |
| H | 0.000000  | -18.190458 | -5.194441 |
| C | 0.000000  | -8.502154  | -2.390921 |
| C | 0.000000  | -9.538945  | -3.012907 |
| C | 0.000000  | -12.294620 | 3.756241  |
| C | 0.000000  | -13.320935 | 3.115901  |
| C | 0.729383  | -11.962838 | -3.208256 |
| C | -0.729383 | -11.962838 | -3.208256 |
| C | -0.729469 | -14.588440 | 1.041105  |
| C | 0.729469  | -14.588440 | 1.041105  |
| C | 0.730671  | -17.069462 | -3.430323 |
| C | -0.730671 | -17.069462 | -3.430323 |
| H | 0.000000  | -15.448730 | 2.935461  |
| H | 0.000000  | -19.148384 | -3.646504 |

**POM-5**

E= -3422.87410206

v= 2.2375

|   |           |            |          |
|---|-----------|------------|----------|
| B | -2.041467 | 3.741324   | 0.000000 |
| B | -0.384132 | 3.660951   | 0.000000 |
| B | -2.759759 | 5.235709   | 0.000000 |
| B | -2.901519 | 2.323771   | 0.000000 |
| C | -3.771644 | 7.589008   | 0.000000 |
| H | -4.849543 | 7.762005   | 0.000000 |
| C | 2.187437  | 3.536622   | 0.000000 |
| C | -4.138779 | 0.080651   | 0.000000 |
| H | -5.228414 | 0.013738   | 0.000000 |
| B | 2.041467  | -3.741324  | 0.000000 |
| B | 2.901519  | -2.323771  | 0.000000 |
| B | 0.384132  | -3.660951  | 0.000000 |
| B | 2.759759  | -5.235709  | 0.000000 |
| C | -2.187437 | -3.536622  | 0.000000 |
| C | 4.138779  | -0.080651  | 0.000000 |
| H | 5.228414  | -0.013738  | 0.000000 |
| C | 3.771644  | -7.589008  | 0.000000 |
| H | 4.849543  | -7.762005  | 0.000000 |
| C | 2.906971  | 2.273260   | 0.000000 |
| C | 3.476385  | 1.206723   | 0.000000 |
| C | -3.476385 | -1.206723  | 0.000000 |
| C | -2.906971 | -2.273260  | 0.000000 |
| B | -2.753205 | -10.791829 | 0.000000 |
| B | -1.095803 | -10.870642 | 0.000000 |
| B | -3.603999 | -12.214598 | 0.000000 |
| B | -3.473427 | -9.298528  | 0.000000 |

|   |           |            |           |
|---|-----------|------------|-----------|
| C | -4.813106 | -14.473090 | 0.000000  |
| H | -5.901888 | -14.552912 | 0.000000  |
| C | 1.475555  | -10.997961 | 0.000000  |
| C | -4.484734 | -6.944759  | 0.000000  |
| H | -5.562492 | -6.770838  | 0.000000  |
| C | -3.027011 | -4.723534  | 0.000000  |
| C | 2.986560  | -8.805380  | 0.000000  |
| C | 2.315396  | -9.811003  | 0.000000  |
| C | -3.698856 | -5.728703  | 0.000000  |
| C | -4.223702 | -13.322752 | 0.729790  |
| C | -4.223702 | -13.322752 | -0.729790 |
| B | 2.753205  | 10.791829  | 0.000000  |
| B | 3.603999  | 12.214598  | 0.000000  |
| B | 3.473427  | 9.298528   | 0.000000  |
| B | 1.095803  | 10.870642  | 0.000000  |
| C | 4.484734  | 6.944759   | 0.000000  |
| H | 5.562492  | 6.770838   | 0.000000  |
| C | 4.813106  | 14.473090  | 0.000000  |
| H | 5.901888  | 14.552912  | 0.000000  |
| C | -1.475555 | 10.997961  | 0.000000  |
| C | -2.315396 | 9.811003   | 0.000000  |
| C | 3.698856  | 5.728703   | 0.000000  |
| C | 3.027011  | 4.723534   | 0.000000  |
| C | -2.986560 | 8.805380   | 0.000000  |
| C | 4.223702  | 13.322752  | -0.729790 |
| C | 4.223702  | 13.322752  | 0.729790  |
| C | -0.173994 | 10.932884  | 0.729349  |
| C | -0.173994 | 10.932884  | -0.729349 |
| C | -3.281071 | 6.393699   | 0.729724  |
| C | -3.281071 | 6.393699   | -0.729724 |
| C | 3.994542  | 8.140101   | 0.729643  |
| C | 3.994542  | 8.140101   | -0.729643 |
| C | 0.885751  | 3.599896   | 0.729336  |
| C | 0.885751  | 3.599896   | -0.729336 |
| C | 3.533641  | -1.222217  | 0.729668  |
| C | 3.533641  | -1.222217  | -0.729668 |
| C | -3.533641 | 1.222217   | -0.729668 |
| C | -3.533641 | 1.222217   | 0.729668  |
| C | -3.994542 | -8.140101  | 0.729643  |
| C | -3.994542 | -8.140101  | -0.729643 |
| C | -0.885751 | -3.599896  | -0.729336 |
| C | -0.885751 | -3.599896  | 0.729336  |
| C | 3.281071  | -6.393699  | 0.729724  |
| C | 3.281071  | -6.393699  | -0.729724 |
| C | 0.173994  | -10.932884 | 0.729349  |
| C | 0.173994  | -10.932884 | -0.729349 |
| B | 1.395842  | -18.307346 | 0.000000  |
| B | 2.224024  | -16.868763 | 0.000000  |
| B | -0.262663 | -18.241711 | 0.000000  |
| B | 2.197716  | -19.759975 | 0.000000  |
| C | -2.819213 | -18.060794 | 0.000000  |
| C | 3.435971  | -14.610576 | 0.000000  |
| H | 4.525100  | -14.533955 | 0.000000  |
| C | 3.428759  | -21.992103 | 0.000000  |
| H | 4.515779  | -22.078454 | 0.000000  |
| C | 2.194865  | -12.261253 | 0.000000  |
| C | 2.765324  | -13.327258 | 0.000000  |
| C | -4.132473 | -15.750584 | 0.000000  |
| C | -3.543034 | -16.806946 | 0.000000  |
| C | 2.841792  | -15.757786 | 0.729365  |
| C | 2.841792  | -15.757786 | -0.729365 |
| C | -1.531647 | -18.172758 | -0.729461 |
| C | -1.531647 | -18.172758 | 0.729461  |
| C | 2.810181  | -20.870304 | 0.730656  |
| C | 2.810181  | -20.870304 | -0.730656 |
| H | -3.465222 | -18.940973 | 0.000000  |
| H | 2.921641  | -22.957458 | 0.000000  |
| B | -1.395842 | 18.307346  | 0.000000  |
| B | 0.262663  | 18.241711  | 0.000000  |

|   |           |           |           |
|---|-----------|-----------|-----------|
| B | -2.224024 | 16.868763 | 0.000000  |
| B | -2.197716 | 19.759975 | 0.000000  |
| C | -3.435971 | 14.610576 | 0.000000  |
| H | -4.525100 | 14.533955 | 0.000000  |
| C | -2.841792 | 15.757786 | 0.729365  |
| C | -2.841792 | 15.757786 | -0.729365 |
| C | -2.810181 | 20.870304 | 0.730656  |
| C | -2.810181 | 20.870304 | -0.730656 |
| C | 1.531647  | 18.172758 | 0.729461  |
| C | 1.531647  | 18.172758 | -0.729461 |
| C | 3.543034  | 16.806946 | 0.000000  |
| C | 4.132473  | 15.750584 | 0.000000  |
| C | -2.765324 | 13.327258 | 0.000000  |
| C | -2.194865 | 12.261253 | 0.000000  |
| C | -3.428759 | 21.992103 | 0.000000  |
| H | -2.921641 | 22.957458 | 0.000000  |
| H | -4.515779 | 22.078454 | 0.000000  |
| C | 2.819213  | 18.060794 | 0.000000  |
| H | 3.465222  | 18.940973 | 0.000000  |

**POM-6**

E= -2231.95382190

v= 8.4481

|   |            |           |           |
|---|------------|-----------|-----------|
| B | 0.000000   | 0.000000  | 0.000000  |
| B | 0.000000   | 1.655407  | 0.000000  |
| B | 1.433624   | -0.827703 | 0.000000  |
| B | -1.433624  | -0.827703 | 0.000000  |
| C | 3.661959   | -2.114233 | 0.000000  |
| C | 0.000000   | 4.228467  | 0.000000  |
| C | -3.661959  | -2.114233 | 0.000000  |
| B | -7.277034  | 4.201398  | 0.000000  |
| B | -5.831515  | 5.018337  | 0.000000  |
| B | -7.261765  | 2.541072  | 0.000000  |
| B | -8.714635  | 5.031397  | 0.000000  |
| C | -3.580067  | 6.243934  | 0.000000  |
| H | -3.508880  | 7.333333  | 0.000000  |
| C | -10.922105 | 6.305880  | 0.000000  |
| H | -10.986997 | 7.394379  | 0.000000  |
| C | -1.233405  | 4.997817  | 0.000000  |
| C | -2.295311  | 5.576018  | 0.000000  |
| C | -4.944939  | -1.430749 | 0.000000  |
| C | -5.976629  | -0.800211 | 0.000000  |
| B | 7.277034   | 4.201398  | 0.000000  |
| B | 8.714635   | 5.031397  | 0.000000  |
| B | 5.831515   | 5.018337  | 0.000000  |
| B | 7.261765   | 2.541072  | 0.000000  |
| C | 3.580067   | 6.243934  | 0.000000  |
| H | 3.508880   | 7.333333  | 0.000000  |
| C | 10.922105  | 6.305880  | 0.000000  |
| H | 10.986997  | 7.394379  | 0.000000  |
| H | 11.897218  | 5.817829  | 0.000000  |
| C | 7.197439   | -0.021538 | 0.000000  |
| H | 8.105293   | -0.627887 | 0.000000  |
| C | 5.976629   | -0.800211 | 0.000000  |
| C | 2.295311   | 5.576018  | 0.000000  |
| C | 1.233405   | 4.997817  | 0.000000  |
| C | 4.944939   | -1.430749 | 0.000000  |
| C | 9.812706   | 5.665368  | 0.730669  |
| C | 9.812706   | 5.665368  | -0.730669 |
| C | 7.249907   | 1.269746  | -0.729317 |
| C | 7.249907   | 1.269746  | 0.729317  |
| C | 2.533506   | -1.462720 | -0.729713 |
| C | 2.533506   | -1.462720 | 0.729713  |
| C | 4.724586   | 5.643731  | -0.729317 |
| C | 4.724586   | 5.643731  | 0.729317  |
| C | 0.000000   | 2.925440  | -0.729713 |
| C | 0.000000   | 2.925440  | 0.729713  |
| C | -4.724586  | 5.643731  | -0.729317 |
| C | -4.724586  | 5.643731  | 0.729317  |
| C | -2.533506  | -1.462720 | 0.729713  |

|   |            |            |           |
|---|------------|------------|-----------|
| C | -2.533506  | -1.462720  | -0.729713 |
| C | -7.249907  | 1.269746   | 0.729317  |
| C | -7.249907  | 1.269746   | -0.729317 |
| C | -9.812706  | 5.665368   | -0.730669 |
| C | -9.812706  | 5.665368   | 0.730669  |
| H | -11.897218 | 5.817829   | 0.000000  |
| C | -7.197439  | -0.021538  | 0.000000  |
| H | -8.105293  | -0.627887  | 0.000000  |
| B | 0.000000   | -8.402795  | 0.000000  |
| B | 1.430250   | -7.559409  | 0.000000  |
| B | -1.430250  | -7.559409  | 0.000000  |
| B | 0.000000   | -10.062794 | 0.000000  |
| C | -3.617372  | -6.222396  | 0.000000  |
| C | 3.617372   | -6.222396  | 0.000000  |
| H | 4.596413   | -6.705446  | 0.000000  |
| C | 0.000000   | -12.611760 | 0.000000  |
| H | 0.910221   | -13.212208 | 0.000000  |
| C | 2.525321   | -6.913477  | 0.729317  |
| C | 2.525321   | -6.913477  | -0.729317 |
| C | 0.000000   | -11.330737 | -0.730669 |
| C | 0.000000   | -11.330737 | 0.730669  |
| C | -2.525321  | -6.913477  | -0.729317 |
| C | -2.525321  | -6.913477  | 0.729317  |
| C | 3.681318   | -4.775807  | 0.000000  |
| C | 3.711534   | -3.567069  | 0.000000  |
| C | -3.681318  | -4.775807  | 0.000000  |
| C | -3.711534  | -3.567069  | 0.000000  |
| H | -0.910221  | -13.212208 | 0.000000  |
| H | -4.596413  | -6.705446  | 0.000000  |

**POM-7**

E= -1650.47469226

v= 5.2177

|   |            |           |           |
|---|------------|-----------|-----------|
| B | -11.214782 | 0.000000  | 0.000000  |
| B | -4.758758  | 3.597953  | 0.000000  |
| B | -4.758758  | -3.597953 | 0.000000  |
| C | -3.342030  | 5.715238  | 0.000000  |
| H | -3.789705  | 6.711727  | 0.000000  |
| C | -13.747028 | 0.000000  | 0.000000  |
| H | -14.347599 | -0.910290 | 0.000000  |
| H | -14.347599 | 0.910290  | 0.000000  |
| C | -3.342030  | -5.715238 | 0.000000  |
| H | -3.789705  | -6.711727 | 0.000000  |
| B | -6.983310  | 0.000000  | 0.000000  |
| C | -6.214055  | -1.307018 | 0.000000  |
| C | -5.571395  | -2.349152 | 0.000000  |
| C | -6.214055  | 1.307018  | 0.000000  |
| C | -5.571395  | 2.349152  | 0.000000  |
| C | -8.497201  | 0.000000  | 0.000000  |
| C | -9.721531  | 0.000000  | 0.000000  |
| C | -1.897475  | -5.731044 | 0.000000  |
| C | -0.681380  | -5.742291 | 0.000000  |
| C | 0.681380   | -5.742291 | 0.000000  |
| C | 1.897475   | -5.731044 | 0.000000  |
| C | -4.074363  | -4.655390 | 0.736083  |
| C | -4.074363  | -4.655390 | -0.736083 |
| C | -12.471439 | 0.000000  | 0.737662  |
| C | -12.471439 | 0.000000  | -0.737662 |
| C | -4.074363  | 4.655390  | 0.736083  |
| C | -4.074363  | 4.655390  | -0.736083 |
| B | 11.214782  | 0.000000  | 0.000000  |
| B | 4.758758   | -3.597953 | 0.000000  |
| B | 4.758758   | 3.597953  | 0.000000  |
| C | 3.342030   | -5.715238 | 0.000000  |
| H | 3.789705   | -6.711727 | 0.000000  |
| C | 13.747028  | 0.000000  | 0.000000  |
| H | 14.347599  | 0.910290  | 0.000000  |
| H | 14.347599  | -0.910290 | 0.000000  |
| C | 3.342030   | 5.715238  | 0.000000  |



|   |           |           |           |
|---|-----------|-----------|-----------|
| H | 3.789705  | 6.711727  | 0.000000  |
| B | 6.983310  | 0.000000  | 0.000000  |
| C | 6.214055  | 1.307018  | 0.000000  |
| C | 5.571395  | 2.349152  | 0.000000  |
| C | 6.214055  | -1.307018 | 0.000000  |
| C | 5.571395  | -2.349152 | 0.000000  |
| C | 8.497201  | 0.000000  | 0.000000  |
| C | 9.721531  | 0.000000  | 0.000000  |
| C | 1.897475  | 5.731044  | 0.000000  |
| C | 0.681380  | 5.742291  | 0.000000  |
| C | -0.681380 | 5.742291  | 0.000000  |
| C | -1.897475 | 5.731044  | 0.000000  |
| C | 4.074363  | 4.655390  | 0.736083  |
| C | 4.074363  | 4.655390  | -0.736083 |
| C | 12.471439 | 0.000000  | 0.737662  |
| C | 12.471439 | 0.000000  | -0.737662 |
| C | 4.074363  | -4.655390 | 0.736083  |
| C | 4.074363  | -4.655390 | -0.736083 |

**POM-8**

E= -2626.80396634

v= 3.3009

|   |           |            |           |
|---|-----------|------------|-----------|
| B | 0.000000  | 8.021664   | -4.570835 |
| B | 0.000000  | 11.801647  | 1.573275  |
| B | 0.000000  | 15.397593  | -4.875438 |
| C | 0.000000  | 11.727456  | 4.119682  |
| C | 0.000000  | 5.716004   | -5.654246 |
| H | 0.000000  | 5.585116   | -6.738783 |
| C | 0.000000  | 17.553813  | -6.202921 |
| H | 0.000000  | 17.588172  | -7.292880 |
| B | 0.000000  | 11.794381  | -2.657026 |
| C | 0.000000  | 13.083369  | -3.450618 |
| C | 0.000000  | 14.125943  | -4.092536 |
| C | 0.000000  | 11.825076  | -1.140661 |
| C | 0.000000  | 11.828984  | 0.083698  |
| C | 0.000000  | 10.454353  | -3.367942 |
| C | 0.000000  | 9.363256   | -3.923392 |
| C | 0.737697  | 16.467618  | -5.534202 |
| C | -0.737697 | 16.467618  | -5.534202 |
| C | 0.736026  | 6.889473   | -5.123643 |
| C | -0.736026 | 6.889473   | -5.123643 |
| C | 0.736122  | 11.784399  | 2.832866  |
| C | -0.736122 | 11.784399  | 2.832866  |
| B | 0.000000  | 3.742883   | 6.577252  |
| B | 0.000000  | 0.000000   | 0.381536  |
| B | 0.000000  | -3.742883  | 6.577252  |
| C | 0.000000  | 0.000000   | -2.178956 |
| C | 0.000000  | 6.052363   | 7.650810  |
| H | 0.000000  | 6.189517   | 8.734483  |
| C | 0.000000  | -6.052363  | 7.650810  |
| H | 0.000000  | -6.189517  | 8.734483  |
| B | 0.000000  | 0.000000   | 4.610382  |
| C | 0.000000  | -1.320068  | 5.353511  |
| C | 0.000000  | -2.403234  | 5.924250  |
| C | 0.000000  | 0.000000   | 3.093503  |
| C | 0.000000  | 0.000000   | 1.869030  |
| C | 0.000000  | 1.320068   | 5.353511  |
| C | 0.000000  | 2.403234   | 5.924250  |
| C | 0.000000  | -7.291952  | 6.909236  |
| C | 0.000000  | -8.330800  | 6.276880  |
| C | 0.000000  | -9.487518  | 5.555743  |
| C | 0.000000  | -10.512456 | 4.901095  |
| C | 0.736323  | -4.875213  | 7.127657  |
| C | -0.736323 | -4.875213  | 7.127657  |
| C | 0.736323  | 4.875213   | 7.127657  |
| C | -0.736323 | 4.875213   | 7.127657  |
| C | 0.735893  | 0.000000   | -0.879423 |
| C | -0.735893 | 0.000000   | -0.879423 |
| B | 0.000000  | -15.397593 | -4.875438 |

|   |           |            |           |
|---|-----------|------------|-----------|
| B | 0.000000  | -11.801647 | 1.573275  |
| B | 0.000000  | -8.021664  | -4.570835 |
| C | 0.000000  | -11.727456 | 4.119682  |
| H | 0.000000  | -12.636469 | 4.725514  |
| C | 0.000000  | -17.553813 | -6.202921 |
| H | 0.000000  | -17.588172 | -7.292880 |
| H | 0.000000  | -18.542484 | -5.742787 |
| C | 0.000000  | -5.716004  | -5.654246 |
| H | 0.000000  | -5.585116  | -6.738783 |
| B | 0.000000  | -11.794381 | -2.657026 |
| C | 0.000000  | -10.454353 | -3.367942 |
| C | 0.000000  | -9.363256  | -3.923392 |
| C | 0.000000  | -11.825076 | -1.140661 |
| C | 0.000000  | -11.828984 | 0.083698  |
| C | 0.000000  | -13.083369 | -3.450618 |
| C | 0.000000  | -14.125943 | -4.092536 |
| C | 0.000000  | -4.469844  | -4.923317 |
| C | 0.000000  | -3.421900  | -4.306317 |
| C | 0.000000  | -2.255408  | -3.601868 |
| C | 0.000000  | -1.221455  | -2.962391 |
| C | 0.736026  | -6.889473  | -5.123643 |
| C | -0.736026 | -6.889473  | -5.123643 |
| C | 0.737697  | -16.467618 | -5.534202 |
| C | -0.737697 | -16.467618 | -5.534202 |
| C | 0.736122  | -11.784399 | 2.832866  |
| C | -0.736122 | -11.784399 | 2.832866  |
| C | 0.000000  | 10.512456  | 4.901095  |
| C | 0.000000  | 9.487518   | 5.555743  |
| C | 0.000000  | 8.330800   | 6.276880  |
| C | 0.000000  | 7.291952   | 6.909236  |
| C | 0.000000  | 4.469844   | -4.923317 |
| C | 0.000000  | 3.421900   | -4.306317 |
| C | 0.000000  | 2.255408   | -3.601868 |
| C | 0.000000  | 1.221455   | -2.962391 |
| H | 0.000000  | 12.636469  | 4.725514  |
| H | 0.000000  | 18.542484  | -5.742787 |

**POM-9**

E= -3603.13323561

v= 1.6799

|   |           |           |           |
|---|-----------|-----------|-----------|
| B | -3.477550 | 21.798845 | 0.000000  |
| B | 2.525364  | 17.502086 | 0.000000  |
| B | -4.003002 | 14.433871 | 0.000000  |
| C | 5.047533  | 17.143756 | 0.000000  |
| H | 5.751289  | 17.979249 | 0.000000  |
| C | -4.552038 | 24.091658 | 0.000000  |
| H | -5.631072 | 24.249342 | 0.000000  |
| H | -3.982765 | 25.021763 | 0.000000  |
| C | -5.338379 | 12.264325 | 0.000000  |
| H | -6.430738 | 12.255900 | 0.000000  |
| B | -1.679104 | 17.968750 | 0.000000  |
| C | -2.535623 | 16.716746 | 0.000000  |
| C | -3.209545 | 15.694575 | 0.000000  |
| C | -0.168880 | 17.829174 | 0.000000  |
| C | 1.048209  | 17.695921 | 0.000000  |
| C | -2.322982 | 19.338599 | 0.000000  |
| C | -2.843389 | 20.446842 | 0.000000  |
| C | -4.751890 | 10.943998 | 0.000000  |
| C | -4.256422 | 9.833421  | 0.000000  |
| C | -3.687509 | 8.595181  | 0.000000  |
| C | -3.168401 | 7.495853  | 0.000000  |
| C | -4.679425 | 13.370841 | 0.735985  |
| C | -4.679425 | 13.370841 | -0.735985 |
| C | -4.010756 | 22.936640 | 0.737686  |
| C | -4.010756 | 22.936640 | -0.737686 |
| C | 3.775134  | 17.344130 | 0.736115  |
| C | 3.775134  | 17.344130 | -0.736115 |
| B | 5.781554  | 1.502940  | 0.000000  |
| B | 0.015929  | 5.903608  | 0.000000  |

|   |           |            |           |
|---|-----------|------------|-----------|
| B | 6.588538  | 8.933445   | 0.000000  |
| C | -2.528109 | 6.193715   | 0.000000  |
| C | 6.620160  | -0.901892  | 0.000000  |
| H | 7.684731  | -1.146525  | 0.000000  |
| C | 7.916204  | 11.106771  | 0.000000  |
| H | 9.008417  | 11.120324  | 0.000000  |
| B | 4.218391  | 5.431950   | 0.000000  |
| C | 5.102050  | 6.662201   | 0.000000  |
| C | 5.789512  | 7.675321   | 0.000000  |
| C | 2.710755  | 5.598695   | 0.000000  |
| C | 1.493943  | 5.735512   | 0.000000  |
| C | 4.814348  | 4.038981   | 0.000000  |
| C | 5.268385  | 2.901972   | 0.000000  |
| C | 7.319683  | 12.422280  | 0.000000  |
| C | 6.808863  | 13.525974  | 0.000000  |
| C | 6.222881  | 14.756667  | 0.000000  |
| C | 5.687944  | 15.848869  | 0.000000  |
| C | 7.263250  | 9.996299   | 0.736338  |
| C | 7.263250  | 9.996299   | -0.736338 |
| C | 6.215881  | 0.320938   | 0.736215  |
| C | 6.215881  | 0.320938   | -0.736215 |
| C | -1.236973 | 6.046201   | 0.735868  |
| C | -1.236973 | 6.046201   | -0.735868 |
| B | -5.781554 | -1.502940  | 0.000000  |
| B | -0.015929 | -5.903608  | 0.000000  |
| B | -6.588538 | -8.933445  | 0.000000  |
| C | 2.528109  | -6.193715  | 0.000000  |
| C | -6.620160 | 0.901892   | 0.000000  |
| H | -7.684731 | 1.146525   | 0.000000  |
| C | -7.916204 | -11.106771 | 0.000000  |
| H | -9.008417 | -11.120324 | 0.000000  |
| B | -4.218391 | -5.431950  | 0.000000  |
| C | -5.102050 | -6.662201  | 0.000000  |
| C | -5.789512 | -7.675321  | 0.000000  |
| C | -2.710755 | -5.598695  | 0.000000  |
| C | -1.493943 | -5.735512  | 0.000000  |
| C | -4.814348 | -4.038981  | 0.000000  |
| C | -5.268385 | -2.901972  | 0.000000  |
| C | -7.319683 | -12.422280 | 0.000000  |
| C | -6.808863 | -13.525974 | 0.000000  |
| C | -6.222881 | -14.756667 | 0.000000  |
| C | -5.687944 | -15.848869 | 0.000000  |
| C | -7.263250 | -9.996299  | 0.736338  |
| C | -7.263250 | -9.996299  | -0.736338 |
| C | -6.215881 | -0.320938  | 0.736215  |
| C | -6.215881 | -0.320938  | -0.736215 |
| C | 1.236973  | -6.046201  | 0.735868  |
| C | 1.236973  | -6.046201  | -0.735868 |
| B | 3.477550  | -21.798845 | 0.000000  |
| B | -2.525364 | -17.502086 | 0.000000  |
| B | 4.003002  | -14.433871 | 0.000000  |
| C | -5.047533 | -17.143756 | 0.000000  |
| H | -5.751289 | -17.979249 | 0.000000  |
| C | 4.552038  | -24.091658 | 0.000000  |
| H | 5.631072  | -24.249342 | 0.000000  |
| H | 3.982765  | -25.021763 | 0.000000  |
| C | 5.338379  | -12.264325 | 0.000000  |
| H | 6.430738  | -12.255900 | 0.000000  |
| B | 1.679104  | -17.968750 | 0.000000  |
| C | 2.535623  | -16.716746 | 0.000000  |
| C | 3.209545  | -15.694575 | 0.000000  |
| C | 0.168880  | -17.829174 | 0.000000  |
| C | -1.048209 | -17.695921 | 0.000000  |
| C | 2.322982  | -19.338599 | 0.000000  |
| C | 2.843389  | -20.446842 | 0.000000  |
| C | 4.751890  | -10.943998 | 0.000000  |
| C | 4.256422  | -9.833421  | 0.000000  |
| C | 3.687509  | -8.595181  | 0.000000  |
| C | 3.168401  | -7.495853  | 0.000000  |

|   |           |            |           |
|---|-----------|------------|-----------|
| C | 4.679425  | -13.370841 | 0.735985  |
| C | 4.679425  | -13.370841 | -0.735985 |
| C | 4.010756  | -22.936640 | 0.737686  |
| C | 4.010756  | -22.936640 | -0.737686 |
| C | -3.775134 | -17.344130 | 0.736115  |
| C | -3.775134 | -17.344130 | -0.736115 |
| C | -3.445015 | 5.068878   | 0.000000  |
| C | -4.197732 | 4.114219   | 0.000000  |
| C | -5.029140 | 3.034563   | 0.000000  |
| C | -5.759677 | 2.062364   | 0.000000  |
| C | 5.759677  | -2.062364  | 0.000000  |
| C | 5.029140  | -3.034563  | 0.000000  |
| C | 4.197732  | -4.114219  | 0.000000  |
| C | 3.445015  | -5.068878  | 0.000000  |

**POM-10**

E= -4579.46249723

v= 1.1331

|   |           |            |           |
|---|-----------|------------|-----------|
| B | 0.000000  | 3.731711   | -4.976893 |
| B | 0.000000  | 0.000000   | 1.240861  |
| B | 0.000000  | -3.731711  | -4.976893 |
| C | 0.000000  | 0.000000   | 3.801426  |
| C | 0.000000  | 6.027534   | -6.079330 |
| H | 0.000000  | 6.151036   | -7.164654 |
| C | 0.000000  | -6.027534  | -6.079330 |
| H | 0.000000  | -6.151036  | -7.164654 |
| B | 0.000000  | 0.000000   | -2.988019 |
| C | 0.000000  | -1.318880  | -3.733427 |
| C | 0.000000  | -2.398564  | -4.310694 |
| C | 0.000000  | 0.000000   | -1.471221 |
| C | 0.000000  | 0.000000   | -0.246740 |
| C | 0.000000  | 1.318880   | -3.733427 |
| C | 0.000000  | 2.398564   | -4.310694 |
| C | 0.000000  | -7.277293  | -5.355116 |
| C | 0.000000  | -8.325913  | -4.739298 |
| C | 0.000000  | -9.492663  | -4.035323 |
| C | 0.000000  | -10.526177 | -3.395175 |
| C | -0.736231 | -4.857706  | -5.540368 |
| C | 0.736231  | -4.857706  | -5.540368 |
| C | -0.736231 | 4.857706   | -5.540368 |
| C | 0.736231  | 4.857706   | -5.540368 |
| C | -0.735872 | 0.000000   | 2.501881  |
| C | 0.735872  | 0.000000   | 2.501881  |
| B | 0.000000  | -15.491592 | 6.138810  |
| B | 0.000000  | -11.742823 | -0.049688 |
| B | 0.000000  | -8.015183  | 6.171526  |
| C | 0.000000  | -11.746753 | -2.610211 |
| C | 0.000000  | -17.802146 | 7.209876  |
| H | 0.000000  | -17.939975 | 8.293471  |
| C | 0.000000  | -5.718409  | 7.272254  |
| H | 0.000000  | -5.593939  | 8.357471  |
| B | 0.000000  | -11.744932 | 4.179152  |
| C | 0.000000  | -10.427449 | 4.927446  |
| C | 0.000000  | -9.348232  | 5.505553  |
| C | 0.000000  | -11.741440 | 2.662327  |
| C | 0.000000  | -11.741105 | 1.437854  |
| C | 0.000000  | -13.066687 | 4.918936  |
| C | 0.000000  | -14.150961 | 5.487585  |
| C | 0.000000  | -4.469060  | 6.546875  |
| C | 0.000000  | -3.420851  | 5.930352  |
| C | 0.000000  | -2.254545  | 5.225642  |
| C | 0.000000  | -1.221238  | 4.585152  |
| C | -0.736183 | -6.888482  | 6.734096  |
| C | 0.736183  | -6.888482  | 6.734096  |
| C | -0.736353 | -16.624547 | 6.687699  |
| C | 0.736353  | -16.624547 | 6.687699  |
| C | -0.735887 | -11.744567 | -1.310677 |
| C | 0.735887  | -11.744567 | -1.310677 |
| B | 0.000000  | -19.769192 | -5.007888 |
| B | 0.000000  | -23.551472 | 1.132335  |

|   |           |            |           |
|---|-----------|------------|-----------|
| B | 0.000000  | -27.147593 | -5.315378 |
| C | 0.000000  | -23.477203 | 3.678761  |
| C | 0.000000  | -17.461636 | -6.087357 |
| H | 0.000000  | -17.329020 | -7.171694 |
| C | 0.000000  | -29.305111 | -6.640746 |
| H | 0.000000  | -29.340606 | -7.730657 |
| B | 0.000000  | -23.543824 | -3.097935 |
| C | 0.000000  | -24.832592 | -3.891766 |
| C | 0.000000  | -25.875363 | -4.533355 |
| C | 0.000000  | -23.574770 | -1.581585 |
| C | 0.000000  | -23.578723 | -0.357234 |
| C | 0.000000  | -22.203389 | -3.808183 |
| C | 0.000000  | -21.111678 | -4.362403 |
| C | -0.737702 | -28.218220 | -5.973134 |
| C | 0.737702  | -28.218220 | -5.973134 |
| C | -0.735999 | -18.635883 | -5.558554 |
| C | 0.735999  | -18.635883 | -5.558554 |
| C | -0.736121 | -23.534130 | 2.391940  |
| C | 0.736121  | -23.534130 | 2.391940  |
| C | 0.000000  | -12.968950 | -3.392333 |
| C | 0.000000  | -14.002889 | -4.031828 |
| C | 0.000000  | -15.168979 | -4.736916 |
| C | 0.000000  | -16.216440 | -5.354724 |
| C | 0.000000  | -19.041330 | 6.467693  |
| C | 0.000000  | -20.080302 | 5.835548  |
| C | 0.000000  | -21.237014 | 5.114418  |
| C | 0.000000  | -22.262084 | 4.459985  |
| B | 0.000000  | 8.015183   | 6.171526  |
| B | 0.000000  | 15.491592  | 6.138810  |
| B | 0.000000  | 11.742823  | -0.049688 |
| C | 0.000000  | 17.802146  | 7.209876  |
| H | 0.000000  | 17.939975  | 8.293471  |
| C | 0.000000  | 5.718409   | 7.272254  |
| H | 0.000000  | 5.593939   | 8.357471  |
| C | 0.000000  | 11.746753  | -2.610211 |
| B | 0.000000  | 11.744932  | 4.179152  |
| C | 0.000000  | 11.741440  | 2.662327  |
| C | 0.000000  | 11.741105  | 1.437854  |
| C | 0.000000  | 13.066687  | 4.918936  |
| C | 0.000000  | 14.150961  | 5.487585  |
| C | 0.000000  | 10.427449  | 4.927446  |
| C | 0.000000  | 9.348232   | 5.505553  |
| C | 0.000000  | 12.968950  | -3.392333 |
| C | 0.000000  | 14.002889  | -4.031828 |
| C | 0.000000  | 15.168979  | -4.736916 |
| C | 0.000000  | 16.216440  | -5.354724 |
| C | 0.735887  | 11.744567  | -1.310677 |
| C | -0.735887 | 11.744567  | -1.310677 |
| C | 0.736183  | 6.888482   | 6.734096  |
| C | -0.736183 | 6.888482   | 6.734096  |
| C | 0.736353  | 16.624547  | 6.687699  |
| C | -0.736353 | 16.624547  | 6.687699  |
| B | 0.000000  | 27.147593  | -5.315378 |
| B | 0.000000  | 19.769192  | -5.007888 |
| B | 0.000000  | 23.551472  | 1.132335  |
| C | 0.000000  | 17.461636  | -6.087357 |
| H | 0.000000  | 17.329020  | -7.171694 |
| C | 0.000000  | 29.305111  | -6.640746 |
| H | 0.000000  | 30.292916  | -6.180021 |
| H | 0.000000  | 29.340606  | -7.730657 |
| C | 0.000000  | 23.477203  | 3.678761  |
| H | 0.000000  | 24.386292  | 4.284538  |
| B | 0.000000  | 23.543824  | -3.097935 |
| C | 0.000000  | 23.574770  | -1.581585 |
| C | 0.000000  | 23.578723  | -0.357234 |
| C | 0.000000  | 22.203389  | -3.808183 |
| C | 0.000000  | 21.111678  | -4.362403 |
| C | 0.000000  | 24.832592  | -3.891766 |
| C | 0.000000  | 25.875363  | -4.533355 |

|   |           |            |           |
|---|-----------|------------|-----------|
| C | 0.000000  | 22.262084  | 4.459985  |
| C | 0.000000  | 21.237014  | 5.114418  |
| C | 0.000000  | 20.080302  | 5.835548  |
| C | 0.000000  | 19.041330  | 6.467693  |
| C | 0.736121  | 23.534130  | 2.391940  |
| C | -0.736121 | 23.534130  | 2.391940  |
| C | 0.737702  | 28.218220  | -5.973134 |
| C | -0.737702 | 28.218220  | -5.973134 |
| C | 0.735999  | 18.635883  | -5.558554 |
| C | -0.735999 | 18.635883  | -5.558554 |
| C | 0.000000  | 1.221238   | 4.585152  |
| C | 0.000000  | 2.254545   | 5.225642  |
| C | 0.000000  | 3.420851   | 5.930352  |
| C | 0.000000  | 4.469060   | 6.546875  |
| C | 0.000000  | 7.277293   | -5.355116 |
| C | 0.000000  | 8.325913   | -4.739298 |
| C | 0.000000  | 9.492663   | -4.035323 |
| C | 0.000000  | 10.526177  | -3.395175 |
| H | 0.000000  | -24.386292 | 4.284538  |
| H | 0.000000  | -30.292916 | -6.180021 |

**POM-11**

E= -5555.79171690

v= 0.7555

|   |           |            |           |
|---|-----------|------------|-----------|
| B | -5.132576 | 9.848442   | 0.000000  |
| B | 0.911215  | 5.839535   | 0.000000  |
| B | -5.468236 | 2.392894   | 0.000000  |
| C | 3.469073  | 5.722545   | 0.000000  |
| C | -6.130953 | 12.191359  | 0.000000  |
| H | -7.209616 | 12.363546  | 0.000000  |
| C | -6.673458 | 0.149315   | 0.000000  |
| H | -7.763250 | 0.074969   | 0.000000  |
| B | -3.313301 | 6.031220   | 0.000000  |
| C | -4.117326 | 4.747123   | 0.000000  |
| C | -4.742611 | 3.694519   | 0.000000  |
| C | -1.798057 | 5.962742   | 0.000000  |
| C | -0.574831 | 5.907226   | 0.000000  |
| C | -3.998613 | 7.382310   | 0.000000  |
| C | -4.526859 | 8.486813   | 0.000000  |
| C | -6.006298 | -1.132029  | 0.000000  |
| C | -5.438604 | -2.207463  | 0.000000  |
| C | -4.788380 | -3.404999  | 0.000000  |
| C | -4.196078 | -4.466659  | 0.000000  |
| C | -6.082061 | 1.293408   | 0.736213  |
| C | -6.082061 | 1.293408   | -0.736213 |
| C | -5.645085 | 10.998582  | 0.736237  |
| C | -5.645085 | 10.998582  | -0.736237 |
| C | 2.170899  | 5.781911   | 0.735866  |
| C | 2.170899  | 5.781911   | -0.735866 |
| B | 5.132576  | -9.848442  | 0.000000  |
| B | -0.911215 | -5.839535  | 0.000000  |
| B | 5.468236  | -2.392894  | 0.000000  |
| C | -3.469073 | -5.722545  | 0.000000  |
| C | 6.130953  | -12.191359 | 0.000000  |
| H | 7.209616  | -12.363546 | 0.000000  |
| C | 6.673458  | -0.149315  | 0.000000  |
| H | 7.763250  | -0.074969  | 0.000000  |
| B | 3.313301  | -6.031220  | 0.000000  |
| C | 4.117326  | -4.747123  | 0.000000  |
| C | 4.742611  | -3.694519  | 0.000000  |
| C | 1.798057  | -5.962742  | 0.000000  |
| C | 0.574831  | -5.907226  | 0.000000  |
| C | 3.998613  | -7.382310  | 0.000000  |
| C | 4.526859  | -8.486813  | 0.000000  |
| C | 6.006298  | 1.132029   | 0.000000  |
| C | 5.438604  | 2.207463   | 0.000000  |
| C | 4.788380  | 3.404999   | 0.000000  |
| C | 4.196078  | 4.466659   | 0.000000  |
| C | 6.082061  | -1.293408  | 0.736213  |

|   |           |            |           |
|---|-----------|------------|-----------|
| C | 6.082061  | -1.293408  | -0.736213 |
| C | 5.645085  | -10.998582 | 0.736237  |
| C | 5.645085  | -10.998582 | -0.736237 |
| C | -2.170899 | -5.781911  | 0.735866  |
| C | -2.170899 | -5.781911  | -0.735866 |
| B | -6.199746 | -13.620606 | 0.000000  |
| B | -0.152685 | -17.626304 | 0.000000  |
| B | -6.506646 | -21.089151 | 0.000000  |
| C | 2.404981  | -17.746860 | 0.000000  |
| C | -7.196719 | -11.276956 | 0.000000  |
| H | -8.275230 | -11.103805 | 0.000000  |
| C | -7.683627 | -23.347558 | 0.000000  |
| H | -8.772422 | -23.435215 | 0.000000  |
| B | -4.377253 | -17.436268 | 0.000000  |
| C | -5.176481 | -18.722940 | 0.000000  |
| C | -5.794314 | -19.779968 | 0.000000  |
| C | -2.861833 | -17.501653 | 0.000000  |
| C | -1.638605 | -17.556942 | 0.000000  |
| C | -5.065147 | -16.086248 | 0.000000  |
| C | -5.594188 | -14.982147 | 0.000000  |
| C | -6.999300 | -24.619600 | 0.000000  |
| C | -6.415330 | -25.686395 | 0.000000  |
| C | -5.748151 | -26.875045 | 0.000000  |
| C | -5.141386 | -27.929032 | 0.000000  |
| C | -7.107586 | -22.195349 | 0.736356  |
| C | -7.107586 | -22.195349 | -0.736356 |
| C | -6.711598 | -12.469985 | 0.736184  |
| C | -6.711598 | -12.469985 | -0.736184 |
| C | 1.106903  | -17.685475 | 0.735880  |
| C | 1.106903  | -17.685475 | -0.735880 |
| B | 4.404270  | -33.252815 | 0.000000  |
| B | -1.876254 | -29.369294 | 0.000000  |
| B | 4.430655  | -25.870262 | 0.000000  |
| C | -4.416587 | -29.178642 | 0.000000  |
| H | -5.063497 | -30.058894 | 0.000000  |
| C | 5.633387  | -35.466548 | 0.000000  |
| H | 6.720693  | -35.549911 | 0.000000  |
| H | 5.129220  | -36.433502 | 0.000000  |
| C | 5.616094  | -23.615333 | 0.000000  |
| H | 6.705403  | -23.533067 | 0.000000  |
| B | 2.350006  | -29.553597 | 0.000000  |
| C | 3.120303  | -28.246732 | 0.000000  |
| C | 3.723935  | -27.181541 | 0.000000  |
| C | 0.833804  | -29.515931 | 0.000000  |
| C | -0.389473 | -29.464382 | 0.000000  |
| C | 3.084899  | -30.876861 | 0.000000  |
| C | 3.679333  | -31.947222 | 0.000000  |
| C | 4.941808  | -22.337597 | 0.000000  |
| C | 4.372851  | -21.262818 | 0.000000  |
| C | 3.722196  | -20.065497 | 0.000000  |
| C | 3.130643  | -19.003398 | 0.000000  |
| C | 5.033427  | -24.763799 | 0.736004  |
| C | 5.033427  | -24.763799 | -0.736004 |
| C | 5.014222  | -34.351361 | 0.737705  |
| C | 5.014222  | -34.351361 | -0.737705 |
| C | -3.133740 | -29.294457 | 0.736119  |
| C | -3.133740 | -29.294457 | -0.736119 |
| C | -4.307908 | -6.906626  | 0.000000  |
| C | -4.994955 | -7.909581  | 0.000000  |
| C | -5.752045 | -9.042587  | 0.000000  |
| C | -6.415719 | -10.061595 | 0.000000  |
| C | 5.350894  | -13.407240 | 0.000000  |
| C | 4.687972  | -14.426740 | 0.000000  |
| C | 3.931465  | -15.560139 | 0.000000  |
| C | 3.244751  | -16.563319 | 0.000000  |
| B | 6.199746  | 13.620606  | 0.000000  |
| B | 6.506646  | 21.089151  | 0.000000  |
| B | 0.152685  | 17.626304  | 0.000000  |
| C | 7.683627  | 23.347558  | 0.000000  |

|   |           |           |           |
|---|-----------|-----------|-----------|
| H | 8.772422  | 23.435215 | 0.000000  |
| C | 7.196719  | 11.276956 | 0.000000  |
| H | 8.275230  | 11.103805 | 0.000000  |
| C | -2.404981 | 17.746860 | 0.000000  |
| B | 4.377253  | 17.436268 | 0.000000  |
| C | 2.861833  | 17.501653 | 0.000000  |
| C | 1.638605  | 17.556942 | 0.000000  |
| C | 5.176481  | 18.722940 | 0.000000  |
| C | 5.794314  | 19.779968 | 0.000000  |
| C | 5.065147  | 16.086248 | 0.000000  |
| C | 5.594188  | 14.982147 | 0.000000  |
| C | -3.130643 | 19.003398 | 0.000000  |
| C | -3.722196 | 20.065497 | 0.000000  |
| C | -4.372851 | 21.262818 | 0.000000  |
| C | -4.941808 | 22.337597 | 0.000000  |
| C | -1.106903 | 17.685475 | -0.735880 |
| C | -1.106903 | 17.685475 | 0.735880  |
| C | 6.711598  | 12.469985 | -0.736184 |
| C | 6.711598  | 12.469985 | 0.736184  |
| C | 7.107586  | 22.195349 | -0.736356 |
| C | 7.107586  | 22.195349 | 0.736356  |
| B | -4.404270 | 33.252815 | 0.000000  |
| B | -4.430655 | 25.870262 | 0.000000  |
| B | 1.876254  | 29.369294 | 0.000000  |
| C | -5.616094 | 23.615333 | 0.000000  |
| H | -6.705403 | 23.533067 | 0.000000  |
| C | -5.633387 | 35.466548 | 0.000000  |
| H | -5.129220 | 36.433502 | 0.000000  |
| H | -6.720693 | 35.549911 | 0.000000  |
| C | 4.416587  | 29.178642 | 0.000000  |
| H | 5.063497  | 30.058894 | 0.000000  |
| B | -2.350006 | 29.553597 | 0.000000  |
| C | -0.833804 | 29.515931 | 0.000000  |
| C | 0.389473  | 29.464382 | 0.000000  |
| C | -3.120303 | 28.246732 | 0.000000  |
| C | -3.723935 | 27.181541 | 0.000000  |
| C | -3.084899 | 30.876861 | 0.000000  |
| C | -3.679333 | 31.947222 | 0.000000  |
| C | 5.141386  | 27.929032 | 0.000000  |
| C | 5.748151  | 26.875045 | 0.000000  |
| C | 6.415330  | 25.686395 | 0.000000  |
| C | 6.999300  | 24.619600 | 0.000000  |
| C | 3.133740  | 29.294457 | -0.736119 |
| C | 3.133740  | 29.294457 | 0.736119  |
| C | -5.014222 | 34.351361 | -0.737705 |
| C | -5.014222 | 34.351361 | 0.737705  |
| C | -5.033427 | 24.763799 | -0.736004 |
| C | -5.033427 | 24.763799 | 0.736004  |
| C | 4.307908  | 6.906626  | 0.000000  |
| C | 4.994955  | 7.909581  | 0.000000  |
| C | 5.752045  | 9.042587  | 0.000000  |
| C | 6.415719  | 10.061595 | 0.000000  |
| C | -5.350894 | 13.407240 | 0.000000  |
| C | -4.687972 | 14.426740 | 0.000000  |
| C | -3.931465 | 15.560139 | 0.000000  |
| C | -3.244751 | 16.563319 | 0.000000  |

**POM-12**

E= -3603.12872390

v= 3.2527

|   |           |            |          |
|---|-----------|------------|----------|
| B | -3.635024 | -11.424309 | 0.000000 |
| B | 3.635024  | -11.424309 | 0.000000 |
| B | 0.000000  | -17.820900 | 0.000000 |
| C | 5.799266  | -10.079980 | 0.000000 |
| C | -5.799266 | -10.079980 | 0.000000 |
| H | -6.780193 | -10.560584 | 0.000000 |
| C | 0.000000  | -20.352991 | 0.000000 |
| H | -0.910166 | -20.953641 | 0.000000 |
| B | 0.000000  | -13.589356 | 0.000000 |
| C | 0.000000  | -15.103174 | 0.000000 |

|   |            |            |           |
|---|------------|------------|-----------|
| C | 0.000000   | -16.327542 | 0.000000  |
| C | 1.310671   | -12.825714 | 0.000000  |
| C | 2.364198   | -12.201872 | 0.000000  |
| C | -1.310671  | -12.825714 | 0.000000  |
| C | -2.364198  | -12.201872 | 0.000000  |
| C | 0.000000   | -19.077422 | 0.737699  |
| C | 0.000000   | -19.077422 | -0.737699 |
| C | -4.715132  | -10.775404 | 0.735989  |
| C | -4.715132  | -10.775404 | -0.735989 |
| C | 4.715132   | -10.775404 | 0.735989  |
| C | 4.715132   | -10.775404 | -0.735989 |
| B | 3.660566   | -2.113429  | 0.000000  |
| B | -3.660566  | -2.113429  | 0.000000  |
| B | 0.000000   | 4.226857   | 0.000000  |
| C | -5.877541  | -3.393400  | 0.000000  |
| C | 5.877541   | -3.393400  | 0.000000  |
| C | 0.000000   | 6.786799   | 0.000000  |
| B | 0.000000   | 0.000000   | 0.000000  |
| C | 0.000000   | 1.514982   | 0.000000  |
| C | 0.000000   | 2.739296   | 0.000000  |
| C | -1.312013  | -0.757491  | 0.000000  |
| C | -2.372300  | -1.369648  | 0.000000  |
| C | 1.312013   | -0.757491  | 0.000000  |
| C | 2.372300   | -1.369648  | 0.000000  |
| C | -1.226063  | 7.562778   | 0.000000  |
| C | -2.280564  | 8.167779   | 0.000000  |
| C | -3.473190  | 8.826984   | 0.000000  |
| C | -4.547946  | 9.396005   | 0.000000  |
| C | 0.000000   | 5.487150   | 0.736115  |
| C | 0.000000   | 5.487150   | -0.736115 |
| C | 4.752012   | -2.743575  | 0.736115  |
| C | 4.752012   | -2.743575  | -0.736115 |
| C | -4.752012  | -2.743575  | 0.736115  |
| C | -4.752012  | -2.743575  | -0.736115 |
| B | -15.433352 | 8.910450   | 0.000000  |
| B | -8.076230  | 8.860177   | 0.000000  |
| B | -11.711253 | 2.564132   | 0.000000  |
| C | -5.829886  | 10.062302  | 0.000000  |
| H | -5.755638  | 11.152112  | 0.000000  |
| C | -17.626208 | 10.176496  | 0.000000  |
| H | -18.601468 | 9.688594   | 0.000000  |
| H | -17.691302 | 11.265047  | 0.000000  |
| C | -11.629152 | 0.017678   | 0.000000  |
| H | -12.535831 | -0.591527  | 0.000000  |
| B | -11.768727 | 6.794678   | 0.000000  |
| C | -11.762730 | 5.277783   | 0.000000  |
| C | -11.749230 | 4.053481   | 0.000000  |
| C | -10.452059 | 7.547931   | 0.000000  |
| C | -9.385033  | 8.148391   | 0.000000  |
| C | -13.079732 | 7.551587   | 0.000000  |
| C | -14.140066 | 8.163771   | 0.000000  |
| C | -10.411153 | -0.759366  | 0.000000  |
| C | -9.380987  | -1.405621  | 0.000000  |
| C | -8.213786  | -2.108864  | 0.000000  |
| C | -7.162589  | -2.719588  | 0.000000  |
| C | -11.689340 | 1.304278   | 0.735989  |
| C | -11.689340 | 1.304278   | -0.735989 |
| C | -16.521533 | 9.538711   | 0.737699  |
| C | -16.521533 | 9.538711   | -0.737699 |
| C | -6.974207  | 9.471126   | 0.735989  |
| C | -6.974207  | 9.471126   | -0.735989 |
| B | 8.076230   | 8.860177   | 0.000000  |
| B | 15.433352  | 8.910450   | 0.000000  |
| B | 11.711253  | 2.564132   | 0.000000  |
| C | 17.626208  | 10.176496  | 0.000000  |
| H | 17.691302  | 11.265047  | 0.000000  |
| C | 5.829886   | 10.062302  | 0.000000  |
| H | 5.755638   | 11.152112  | 0.000000  |
| C | 11.629152  | 0.017678   | 0.000000  |

|   |           |            |           |
|---|-----------|------------|-----------|
| B | 11.768727 | 6.794678   | 0.000000  |
| C | 11.762730 | 5.277783   | 0.000000  |
| C | 11.749230 | 4.053481   | 0.000000  |
| C | 13.079732 | 7.551587   | 0.000000  |
| C | 14.140066 | 8.163771   | 0.000000  |
| C | 10.452059 | 7.547931   | 0.000000  |
| C | 9.385033  | 8.148391   | 0.000000  |
| C | 11.689340 | 1.304278   | 0.735989  |
| C | 11.689340 | 1.304278   | -0.735989 |
| C | 6.974207  | 9.471126   | 0.735989  |
| C | 6.974207  | 9.471126   | -0.735989 |
| C | 16.521533 | 9.538711   | 0.737699  |
| C | 16.521533 | 9.538711   | -0.737699 |
| C | 5.863206  | -8.636640  | 0.000000  |
| C | 5.907797  | -7.421362  | 0.000000  |
| C | 5.933222  | -6.058915  | 0.000000  |
| C | 5.936527  | -4.843190  | 0.000000  |
| C | -5.936527 | -4.843190  | 0.000000  |
| C | -5.933222 | -6.058915  | 0.000000  |
| C | -5.907797 | -7.421362  | 0.000000  |
| C | -5.863206 | -8.636640  | 0.000000  |
| C | 10.411153 | -0.759366  | 0.000000  |
| C | 9.380987  | -1.405621  | 0.000000  |
| C | 8.213786  | -2.108864  | 0.000000  |
| C | 7.162589  | -2.719588  | 0.000000  |
| C | 4.547946  | 9.396005   | 0.000000  |
| C | 3.473190  | 8.826984   | 0.000000  |
| C | 2.280564  | 8.167779   | 0.000000  |
| C | 1.226063  | 7.562778   | 0.000000  |
| H | 0.910166  | -20.953641 | 0.000000  |
| H | 6.780193  | -10.560584 | 0.000000  |
| H | 12.535831 | -0.591527  | 0.000000  |
| H | 18.601468 | 9.688594   | 0.000000  |

**POM-13**

E= -2259.75160921  
 v= 2.6087

|   |            |           |           |
|---|------------|-----------|-----------|
| B | -16.448545 | 0.000000  | 0.000000  |
| B | -6.048811  | 5.780537  | 0.000000  |
| B | -6.048811  | -5.780537 | 0.000000  |
| C | -4.629845  | 7.896956  | 0.000000  |
| H | -5.078454  | 8.893220  | 0.000000  |
| C | -18.980348 | 0.000000  | 0.000000  |
| H | -19.581124 | -0.910125 | 0.000000  |
| H | -19.581124 | 0.910125  | 0.000000  |
| C | -4.629845  | -7.896956 | 0.000000  |
| H | -5.078454  | -8.893220 | 0.000000  |
| C | -7.521396  | -3.504148 | 0.000000  |
| C | -6.867380  | -4.540050 | 0.000000  |
| C | -7.521396  | 3.504148  | 0.000000  |
| C | -6.867380  | 4.540050  | 0.000000  |
| C | -14.958593 | 0.000000  | 0.000000  |
| C | -3.186432  | -7.914914 | 0.000000  |
| C | -1.968011  | -7.932382 | 0.000000  |
| C | -0.612632  | -7.943721 | 0.000000  |
| C | -5.362501  | -6.837470 | 0.736619  |
| C | -5.362501  | -6.837470 | -0.736619 |
| C | -17.705346 | 0.000000  | 0.738402  |
| C | -17.705346 | 0.000000  | -0.738402 |
| C | -5.362501  | 6.837470  | 0.736619  |
| C | -5.362501  | 6.837470  | -0.736619 |
| B | 16.448545  | 0.000000  | 0.000000  |
| B | 6.048811   | -5.780537 | 0.000000  |
| B | 6.048811   | 5.780537  | 0.000000  |
| C | 4.629845   | -7.896956 | 0.000000  |
| H | 5.078454   | -8.893220 | 0.000000  |
| C | 18.980348  | 0.000000  | 0.000000  |
| H | 19.581124  | 0.910125  | 0.000000  |
| H | 19.581124  | -0.910125 | 0.000000  |

|   |            |           |           |
|---|------------|-----------|-----------|
| C | 4.629845   | 7.896956  | 0.000000  |
| H | 5.078454   | 8.893220  | 0.000000  |
| C | 7.521396   | 3.504148  | 0.000000  |
| C | 6.867380   | 4.540050  | 0.000000  |
| C | 7.521396   | -3.504148 | 0.000000  |
| C | 6.867380   | -4.540050 | 0.000000  |
| C | 14.958593  | 0.000000  | 0.000000  |
| C | 0.612632   | 7.943721  | 0.000000  |
| C | -0.612632  | 7.943721  | 0.000000  |
| C | -1.968011  | 7.932382  | 0.000000  |
| C | -3.186432  | 7.914914  | 0.000000  |
| C | 5.362501   | 6.837470  | 0.736619  |
| C | 5.362501   | 6.837470  | -0.736619 |
| C | 17.705346  | 0.000000  | 0.738402  |
| C | 17.705346  | 0.000000  | -0.738402 |
| C | 5.362501   | -6.837470 | 0.736619  |
| C | 5.362501   | -6.837470 | -0.736619 |
| B | 9.640484   | 0.000000  | 0.000000  |
| B | -9.640484  | 0.000000  | 0.000000  |
| C | -8.875306  | 1.305167  | 0.000000  |
| C | -8.236792  | 2.353803  | 0.000000  |
| C | -8.875306  | -1.305167 | 0.000000  |
| C | -8.236792  | -2.353803 | 0.000000  |
| C | 8.875306   | 1.305167  | 0.000000  |
| C | 8.236792   | 2.353803  | 0.000000  |
| C | 8.875306   | -1.305167 | 0.000000  |
| C | 8.236792   | -2.353803 | 0.000000  |
| C | 0.612632   | -7.943721 | 0.000000  |
| C | 1.968011   | 7.932382  | 0.000000  |
| C | 3.186432   | 7.914914  | 0.000000  |
| C | 1.968011   | -7.932382 | 0.000000  |
| C | 3.186432   | -7.914914 | 0.000000  |
| C | 13.733702  | 0.000000  | 0.000000  |
| C | 12.378729  | 0.000000  | 0.000000  |
| C | 11.150835  | 0.000000  | 0.000000  |
| C | -13.733702 | 0.000000  | 0.000000  |
| C | -12.378729 | 0.000000  | 0.000000  |
| C | -11.150835 | 0.000000  | 0.000000  |

**POM-14**

E= -3616.87806137

v= 1.8350

|   |           |           |           |
|---|-----------|-----------|-----------|
| B | 0.000000  | 10.224868 | -6.789144 |
| B | 0.000000  | 16.289163 | 3.089113  |
| C | 0.000000  | 16.210104 | 5.635946  |
| C | 0.000000  | 7.916802  | -7.868874 |
| H | 0.000000  | 7.786247  | -8.953670 |
| C | 0.000000  | 16.335098 | 0.378320  |
| C | 0.000000  | 16.326517 | 1.603381  |
| C | 0.000000  | 11.566969 | -6.151146 |
| C | 0.736555  | 9.090768  | -7.339217 |
| C | -0.736555 | 9.090768  | -7.339217 |
| C | 0.736643  | 16.268358 | 4.349187  |
| C | -0.736643 | 16.268358 | 4.349187  |
| B | 0.000000  | 16.297437 | -3.716589 |
| C | 0.000000  | 16.328495 | -2.204063 |
| C | 0.000000  | 16.336726 | -0.976344 |
| C | 0.000000  | 12.663535 | -5.604893 |
| C | 0.000000  | 13.872416 | -4.993550 |
| C | 0.000000  | 14.963327 | -4.430334 |
| B | 0.000000  | 6.033301  | 9.453137  |
| B | 0.000000  | 0.000000  | -0.494801 |
| B | 0.000000  | -6.033301 | 9.453137  |
| C | 0.000000  | 0.000000  | -3.056715 |
| C | 0.000000  | 8.345418  | 10.522721 |
| H | 0.000000  | 8.481943  | 11.606718 |
| C | 0.000000  | -8.345418 | 10.522721 |
| H | 0.000000  | -8.481943 | 11.606718 |
| C | 0.000000  | -3.598937 | 8.258934  |

|   |           |            |           |
|---|-----------|------------|-----------|
| C | 0.000000  | -4.691169  | 8.813686  |
| C | 0.000000  | 0.000000   | 2.214032  |
| C | 0.000000  | 0.000000   | 0.988695  |
| C | 0.000000  | 4.691169   | 8.813686  |
| C | 0.000000  | -9.585656  | 9.784221  |
| C | 0.000000  | -10.630928 | 9.157932  |
| C | 0.000000  | -11.788676 | 8.453122  |
| C | 0.736800  | -7.168060  | 10.000004 |
| C | -0.736800 | -7.168060  | 10.000004 |
| C | 0.736800  | 7.168060   | 10.000004 |
| C | -0.736800 | 7.168060   | 10.000004 |
| C | 0.736312  | 0.000000   | -1.756770 |
| C | -0.736312 | 0.000000   | -1.756770 |
| B | 0.000000  | -22.106006 | -7.267741 |
| B | 0.000000  | -16.289163 | 3.089113  |
| B | 0.000000  | -10.224868 | -6.789144 |
| C | 0.000000  | -16.210104 | 5.635946  |
| C | 0.000000  | -24.267560 | -8.585898 |
| H | 0.000000  | -24.306585 | -9.675743 |
| C | 0.000000  | -7.916802  | -7.868874 |
| H | 0.000000  | -7.786247  | -8.953670 |
| C | 0.000000  | -12.663535 | -5.604893 |
| C | 0.000000  | -11.566969 | -6.151146 |
| C | 0.000000  | -16.335098 | 0.378320  |
| C | 0.000000  | -16.326517 | 1.603381  |
| C | 0.000000  | -20.834136 | -6.491594 |
| C | 0.000000  | -4.451372  | -5.836745 |
| C | 0.000000  | -3.402496  | -5.203300 |
| C | 0.000000  | -2.250071  | -4.490821 |
| C | 0.000000  | -1.219255  | -3.841661 |
| C | 0.736555  | -9.090768  | -7.339217 |
| C | -0.736555 | -9.090768  | -7.339217 |
| C | 0.738417  | -23.179040 | -7.922007 |
| C | -0.738417 | -23.179040 | -7.922007 |
| C | 0.736643  | -16.268358 | 4.349187  |
| C | -0.736643 | -16.268358 | 4.349187  |
| B | 0.000000  | -16.297437 | -3.716589 |
| B | 0.000000  | 0.000000   | 6.309021  |
| C | 0.000000  | 0.000000   | 4.795946  |
| C | 0.000000  | 0.000000   | 3.568164  |
| C | 0.000000  | -1.315022  | 7.053977  |
| C | 0.000000  | -2.397122  | 7.634066  |
| C | 0.000000  | -14.963327 | -4.430334 |
| C | 0.000000  | -13.872416 | -4.993550 |
| C | 0.000000  | -16.328495 | -2.204063 |
| C | 0.000000  | -16.336726 | -0.976344 |
| C | 0.000000  | -12.828814 | 7.805406  |
| C | 0.000000  | -5.618088  | -6.526195 |
| C | 0.000000  | -6.670887  | -7.139682 |
| C | 0.000000  | -13.972493 | 7.077993  |
| C | 0.000000  | -14.996506 | 6.417523  |
| C | 0.000000  | -19.788781 | -5.853245 |
| C | 0.000000  | -18.632598 | -5.146715 |
| C | 0.000000  | -17.585180 | -4.505888 |
| C | 0.000000  | 3.598937   | 8.258934  |
| C | 0.000000  | 2.397122   | 7.634066  |
| C | 0.000000  | 1.315022   | 7.053977  |
| C | 0.000000  | 1.219255   | -3.841661 |
| C | 0.000000  | 2.250071   | -4.490821 |
| C | 0.000000  | 3.402496   | -5.203300 |
| C | 0.000000  | 4.451372   | -5.836745 |
| C | 0.000000  | 5.618088   | -6.526195 |
| C | 0.000000  | 6.670887   | -7.139682 |
| C | 0.000000  | 9.585656   | 9.784221  |
| C | 0.000000  | 10.630928  | 9.157932  |
| C | 0.000000  | 11.788676  | 8.453122  |
| C | 0.000000  | 12.828814  | 7.805406  |
| C | 0.000000  | 13.972493  | 7.077993  |
| C | 0.000000  | 14.996506  | 6.417523  |

|   |           |            |           |
|---|-----------|------------|-----------|
| H | 0.000000  | 17.119179  | 6.242046  |
| B | 0.000000  | 22.106006  | -7.267741 |
| C | 0.000000  | 19.788781  | -5.853245 |
| C | 0.000000  | 20.834136  | -6.491594 |
| C | 0.738417  | 23.179040  | -7.922007 |
| C | -0.738417 | 23.179040  | -7.922007 |
| C | 0.000000  | 17.585180  | -4.505888 |
| C | 0.000000  | 18.632598  | -5.146715 |
| C | 0.000000  | 24.267560  | -8.585898 |
| H | 0.000000  | 24.306585  | -9.675743 |
| H | 0.000000  | 25.254346  | -8.121799 |
| H | 0.000000  | -17.119179 | 6.242046  |
| H | 0.000000  | -25.254346 | -8.121799 |

**POM-15**

E= -4974.00448166

v= 0.8122

|   |            |            |           |
|---|------------|------------|-----------|
| B | 6.115824   | 19.112528  | 0.000000  |
| B | -4.363485  | 24.074616  | 0.000000  |
| C | -6.886879  | 23.721089  | 0.000000  |
| C | 7.442212   | 16.936786  | 0.000000  |
| H | 8.534757   | 16.925778  | 0.000000  |
| C | -1.673414  | 24.412234  | 0.000000  |
| C | -2.890428  | 24.271827  | 0.000000  |
| C | 5.334936   | 20.376827  | 0.000000  |
| C | 6.787109   | 18.045655  | 0.736521  |
| C | 6.787109   | 18.045655  | -0.736521 |
| C | -5.613953  | 23.917920  | 0.736638  |
| C | -5.613953  | 23.917920  | -0.736638 |
| B | 2.401811   | 24.815519  | 0.000000  |
| C | 0.894687   | 24.683529  | 0.000000  |
| C | -0.326788  | 24.559669  | 0.000000  |
| C | 4.672514   | 21.407378  | 0.000000  |
| C | 3.933345   | 22.542637  | 0.000000  |
| C | 3.255242   | 23.566085  | 0.000000  |
| B | -9.567068  | 13.189529  | 0.000000  |
| B | 0.974696   | 8.263700   | 0.000000  |
| B | -8.313918  | 1.212876   | 0.000000  |
| C | 3.521344   | 8.542803   | 0.000000  |
| C | -10.885064 | 15.369620  | 0.000000  |
| H | -11.977480 | 15.385772  | 0.000000  |
| C | -9.158278  | -1.190736  | 0.000000  |
| H | -10.224194 | -1.430513  | 0.000000  |
| C | -7.362831  | 3.751887   | 0.000000  |
| C | -7.807169  | 2.610273   | 0.000000  |
| C | -1.718132  | 7.969438   | 0.000000  |
| C | -0.500004  | 8.102177   | 0.000000  |
| C | -8.784410  | 11.925568  | 0.000000  |
| C | -8.304987  | -2.355140  | 0.000000  |
| C | -7.582382  | -3.336246  | 0.000000  |
| C | -6.771500  | -4.422092  | 0.000000  |
| C | -8.749752  | 0.030692   | 0.736718  |
| C | -8.749752  | 0.030692   | -0.736718 |
| C | -10.235823 | 14.257038  | 0.736801  |
| C | -10.235823 | 14.257038  | -0.736801 |
| C | 2.229200   | 8.400927   | 0.736295  |
| C | 2.229200   | 8.400927   | -0.736295 |
| B | 9.567068   | -13.189529 | 0.000000  |
| B | -0.974696  | -8.263700  | 0.000000  |
| B | 8.313918   | -1.212876  | 0.000000  |
| C | -3.521344  | -8.542803  | 0.000000  |
| C | 10.885064  | -15.369620 | 0.000000  |
| H | 11.977480  | -15.385772 | 0.000000  |
| C | 9.158278   | 1.190736   | 0.000000  |
| H | 10.224194  | 1.430513   | 0.000000  |
| C | 7.362831   | -3.751887  | 0.000000  |
| C | 7.807169   | -2.610273  | 0.000000  |
| C | 1.718132   | -7.969438  | 0.000000  |
| C | 0.500004   | -8.102177  | 0.000000  |
| C | 8.784410   | -11.925568 | 0.000000  |

|   |            |            |           |
|---|------------|------------|-----------|
| C | 6.771500   | 4.422092   | 0.000000  |
| C | 6.028053   | 5.396084   | 0.000000  |
| C | 5.193609   | 6.463525   | 0.000000  |
| C | 4.434937   | 7.416610   | 0.000000  |
| C | 8.749752   | -0.030692  | 0.736718  |
| C | 8.749752   | -0.030692  | -0.736718 |
| C | 10.235823  | -14.257038 | 0.736801  |
| C | 10.235823  | -14.257038 | -0.736801 |
| C | -2.229200  | -8.400927  | 0.736295  |
| C | -2.229200  | -8.400927  | -0.736295 |
| B | 5.789518   | -7.531014  | 0.000000  |
| B | -5.789518  | 7.531014   | 0.000000  |
| C | -4.285037  | 7.691303   | 0.000000  |
| C | -3.064356  | 7.823183   | 0.000000  |
| C | -6.393080  | 6.145169   | 0.000000  |
| C | -6.860791  | 5.009993   | 0.000000  |
| C | 6.393080   | -6.145169  | 0.000000  |
| C | 6.860791   | -5.009993  | 0.000000  |
| C | 4.285037   | -7.691303  | 0.000000  |
| C | 3.064356   | -7.823183  | 0.000000  |
| C | -6.028053  | -5.396084  | 0.000000  |
| C | 7.582382   | 3.336246   | 0.000000  |
| C | 8.304987   | 2.355140   | 0.000000  |
| C | -5.193609  | -6.463525  | 0.000000  |
| C | -4.434937  | -7.416610  | 0.000000  |
| C | 8.114242   | -10.900042 | 0.000000  |
| C | 7.362895   | -9.772976  | 0.000000  |
| C | 6.669738   | -8.759561  | 0.000000  |
| C | -8.114242  | 10.900042  | 0.000000  |
| C | -7.362895  | 9.772976   | 0.000000  |
| C | -6.669738  | 8.759561   | 0.000000  |
| C | 4.168952   | 9.840217   | 0.000000  |
| C | 4.702391   | 10.935405  | 0.000000  |
| C | 5.285307   | 12.158480  | 0.000000  |
| C | 5.800465   | 13.270242  | 0.000000  |
| C | 6.358601   | 14.505173  | 0.000000  |
| C | 6.853749   | 15.618531  | 0.000000  |
| C | -10.287672 | 16.683627  | 0.000000  |
| C | -9.779781  | 17.791270  | 0.000000  |
| C | -9.206349  | 19.019403  | 0.000000  |
| C | -8.676363  | 20.124188  | 0.000000  |
| C | -8.078031  | 21.340388  | 0.000000  |
| C | -7.532794  | 22.430126  | 0.000000  |
| B | -6.115824  | -19.112528 | 0.000000  |
| B | 4.363485   | -24.074616 | 0.000000  |
| B | -5.309414  | -30.971404 | 0.000000  |
| C | 6.886879   | -23.721089 | 0.000000  |
| C | -7.442212  | -16.936786 | 0.000000  |
| H | -8.534757  | -16.925778 | 0.000000  |
| C | -6.388506  | -33.261640 | 0.000000  |
| H | -7.467896  | -33.417231 | 0.000000  |
| C | -4.151089  | -28.516047 | 0.000000  |
| C | -4.673949  | -29.623708 | 0.000000  |
| C | 1.673414   | -24.412234 | 0.000000  |
| C | 2.890428   | -24.271827 | 0.000000  |
| C | -5.334936  | -20.376827 | 0.000000  |
| C | -5.845067  | -32.108273 | 0.738427  |
| C | -5.845067  | -32.108273 | -0.738427 |
| C | -6.787109  | -18.045655 | 0.736521  |
| C | -6.787109  | -18.045655 | -0.736521 |
| C | 5.613953   | -23.917920 | 0.736638  |
| C | 5.613953   | -23.917920 | -0.736638 |
| B | -2.401811  | -24.815519 | 0.000000  |
| C | -0.894687  | -24.683529 | 0.000000  |
| C | 0.326788   | -24.559669 | 0.000000  |
| C | -3.047765  | -26.180701 | 0.000000  |
| C | -3.572417  | -27.290890 | 0.000000  |
| C | -4.672514  | -21.407378 | 0.000000  |
| C | -3.933345  | -22.542637 | 0.000000  |

|   |           |            |           |
|---|-----------|------------|-----------|
| C | -3.255242 | -23.566085 | 0.000000  |
| C | 7.532794  | -22.430126 | 0.000000  |
| C | 8.078031  | -21.340388 | 0.000000  |
| C | 8.676363  | -20.124188 | 0.000000  |
| C | 9.206349  | -19.019403 | 0.000000  |
| C | 9.779781  | -17.791270 | 0.000000  |
| C | 10.287672 | -16.683627 | 0.000000  |
| C | -6.853749 | -15.618531 | 0.000000  |
| C | -6.358601 | -14.505173 | 0.000000  |
| C | -5.800465 | -13.270242 | 0.000000  |
| C | -5.285307 | -12.158480 | 0.000000  |
| C | -4.702391 | -10.935405 | 0.000000  |
| C | -4.168952 | -9.840217  | 0.000000  |
| H | -7.587713 | 24.559316  | 0.000000  |
| B | 5.309414  | 30.971404  | 0.000000  |
| C | 4.151089  | 28.516047  | 0.000000  |
| C | 4.673949  | 29.623708  | 0.000000  |
| C | 5.845067  | 32.108273  | 0.738427  |
| C | 5.845067  | 32.108273  | -0.738427 |
| C | 3.047765  | 26.180701  | 0.000000  |
| C | 3.572417  | 27.290890  | 0.000000  |
| C | 6.388506  | 33.261640  | 0.000000  |
| H | 7.467896  | 33.417231  | 0.000000  |
| H | 5.821457  | 34.193006  | 0.000000  |
| H | -5.821457 | -34.193006 | 0.000000  |
| H | 7.587713  | -24.559316 | 0.000000  |

**POM-16**

E= -6331.13091719

v= 0.6271

|   |           |           |           |
|---|-----------|-----------|-----------|
| B | 0.000000  | 26.460485 | -7.369566 |
| B | 0.000000  | 32.528411 | 2.505732  |
| C | 0.000000  | 32.448706 | 5.052540  |
| C | 0.000000  | 24.151810 | -8.448013 |
| H | 0.000000  | 24.020576 | -9.532723 |
| C | 0.000000  | 32.574035 | -0.205057 |
| C | 0.000000  | 32.565701 | 1.020003  |
| C | 0.000000  | 27.802897 | -6.732286 |
| C | 0.736531  | 25.326029 | -7.918981 |
| C | -0.736531 | 25.326029 | -7.918981 |
| C | 0.736637  | 32.507329 | 3.765806  |
| C | -0.736637 | 32.507329 | 3.765806  |
| B | 0.000000  | 32.534578 | -4.299979 |
| C | 0.000000  | 32.566408 | -2.787436 |
| C | 0.000000  | 32.575201 | -1.559726 |
| C | 0.000000  | 28.899746 | -6.186608 |
| C | 0.000000  | 30.108895 | -5.575781 |
| C | 0.000000  | 31.200067 | -5.013089 |
| B | 0.000000  | 22.268763 | 8.865182  |
| B | 0.000000  | 16.230579 | -1.075130 |
| B | 0.000000  | 10.220087 | 8.915157  |
| C | 0.000000  | 16.234206 | -3.637035 |
| C | 0.000000  | 24.580977 | 9.934461  |
| H | 0.000000  | 24.717401 | 11.018466 |
| C | 0.000000  | 7.920418  | 10.011579 |
| H | 0.000000  | 7.796319  | 11.097070 |
| C | 0.000000  | 12.643038 | 7.698484  |
| C | 0.000000  | 11.555360 | 8.262110  |
| C | 0.000000  | 16.227919 | 1.633721  |
| C | 0.000000  | 16.228678 | 0.408383  |
| C | 0.000000  | 20.926340 | 8.226376  |
| C | 0.000000  | 6.671034  | 9.288392  |
| C | 0.000000  | 5.617433  | 8.676309  |
| C | 0.000000  | 4.450185  | 7.987758  |
| C | 0.736671  | 9.091040  | 9.474513  |
| C | -0.736671 | 9.091040  | 9.474513  |
| C | 0.736816  | 23.403643 | 9.411817  |
| C | -0.736816 | 23.403643 | 9.411817  |
| C | 0.736305  | 16.232282 | -2.337110 |
| C | -0.736305 | 16.232282 | -2.337110 |

|   |           |            |           |
|---|-----------|------------|-----------|
| B | 0.000000  | -6.013647  | -7.342335 |
| B | 0.000000  | 0.000000   | 2.643809  |
| B | 0.000000  | 6.013647   | -7.342335 |
| C | 0.000000  | 0.000000   | 5.205724  |
| C | 0.000000  | -8.312375  | -8.440568 |
| H | 0.000000  | -8.435323  | -9.526183 |
| C | 0.000000  | 8.312375   | -8.440568 |
| H | 0.000000  | 8.435323   | -9.526183 |
| C | 0.000000  | 3.590954   | -6.125151 |
| C | 0.000000  | 4.678725   | -6.688605 |
| C | 0.000000  | 0.000000   | -0.065077 |
| C | 0.000000  | 0.000000   | 1.160266  |
| C | 0.000000  | -4.678725  | -6.688605 |
| C | 0.000000  | 11.784299  | -6.419437 |
| C | 0.000000  | 12.833551  | -5.786630 |
| C | 0.000000  | 13.985721  | -5.073734 |
| C | 0.000000  | 15.015868  | -4.423542 |
| C | 0.736698  | 7.142306   | -7.902415 |
| C | -0.736698 | 7.142306   | -7.902415 |
| C | 0.736698  | -7.142306  | -7.902415 |
| C | -0.736698 | -7.142306  | -7.902415 |
| C | 0.736294  | 0.000000   | 3.905807  |
| C | -0.736294 | 0.000000   | 3.905807  |
| B | 0.000000  | 0.000000   | -4.160001 |
| B | 0.000000  | 16.231500  | 5.728667  |
| C | 0.000000  | 16.228218  | 4.215646  |
| C | 0.000000  | 16.227639  | 2.987862  |
| C | 0.000000  | 14.918781  | 6.478162  |
| C | 0.000000  | 13.840231  | 7.064761  |
| C | 0.000000  | 1.314189   | -4.906734 |
| C | 0.000000  | 2.393345   | -5.492263 |
| C | 0.000000  | 0.000000   | -2.647024 |
| C | 0.000000  | 0.000000   | -1.419233 |
| C | 0.000000  | 3.401189   | 7.354526  |
| C | 0.000000  | 10.616574  | -7.107185 |
| C | 0.000000  | 9.562472   | -7.718403 |
| C | 0.000000  | 2.249311   | 6.641160  |
| C | 0.000000  | 1.219150   | 5.990985  |
| C | 0.000000  | -3.590954  | -6.125151 |
| C | 0.000000  | -2.393345  | -5.492263 |
| C | 0.000000  | -1.314189  | -4.906734 |
| C | 0.000000  | 19.833547  | 7.672735  |
| C | 0.000000  | 18.631068  | 7.049189  |
| C | 0.000000  | 17.548099  | 6.470683  |
| C | 0.000000  | 17.454241  | -4.420708 |
| C | 0.000000  | 18.485325  | -5.069440 |
| C | 0.000000  | 19.637899  | -5.781690 |
| C | 0.000000  | 20.687047  | -6.414684 |
| C | 0.000000  | 21.853650  | -7.104341 |
| C | 0.000000  | 22.906234  | -7.718182 |
| C | 0.000000  | 25.821279  | 9.196119  |
| C | 0.000000  | 26.866817  | 8.570279  |
| C | 0.000000  | 28.025251  | 7.866583  |
| C | 0.000000  | 29.066026  | 7.219886  |
| C | 0.000000  | 30.210355  | 6.493471  |
| C | 0.000000  | 31.234789  | 5.833666  |
| B | 0.000000  | -10.220087 | 8.915157  |
| B | 0.000000  | -16.230579 | -1.075130 |
| B | 0.000000  | -22.268763 | 8.865182  |
| C | 0.000000  | -16.234206 | -3.637035 |
| C | 0.000000  | -7.920418  | 10.011579 |
| H | 0.000000  | -7.796319  | 11.097070 |
| C | 0.000000  | -24.580977 | 9.934461  |
| H | 0.000000  | -24.717401 | 11.018466 |
| C | 0.000000  | -19.833547 | 7.672735  |
| C | 0.000000  | -20.926340 | 8.226376  |
| C | 0.000000  | -16.227919 | 1.633721  |
| C | 0.000000  | -16.228678 | 0.408383  |
| C | 0.000000  | -11.555360 | 8.262110  |



|   |           |            |            |
|---|-----------|------------|------------|
| C | 0.000000  | -25.821279 | 9.196119   |
| C | 0.000000  | -26.866817 | 8.570279   |
| C | 0.000000  | -28.025251 | 7.866583   |
| C | 0.736816  | -23.403643 | 9.411817   |
| C | -0.736816 | -23.403643 | 9.411817   |
| C | 0.736671  | -9.091040  | 9.474513   |
| C | -0.736671 | -9.091040  | 9.474513   |
| C | 0.736305  | -16.232282 | -2.337110  |
| C | -0.736305 | -16.232282 | -2.337110  |
| B | 0.000000  | -38.340795 | -7.854950  |
| B | 0.000000  | -32.528411 | 2.505732   |
| B | 0.000000  | -26.460485 | -7.369566  |
| C | 0.000000  | -32.448706 | 5.052540   |
| C | 0.000000  | -40.501351 | -9.174679  |
| H | 0.000000  | -40.539815 | -10.264534 |
| C | 0.000000  | -24.151810 | -8.448013  |
| H | 0.000000  | -24.020576 | -9.532723  |
| C | 0.000000  | -28.899746 | -6.186608  |
| C | 0.000000  | -27.802897 | -6.732286  |
| C | 0.000000  | -32.574035 | -0.205057  |
| C | 0.000000  | -32.565701 | 1.020003   |
| C | 0.000000  | -37.069533 | -7.077765  |
| C | 0.000000  | -20.687047 | -6.414684  |
| C | 0.000000  | -19.637899 | -5.781690  |
| C | 0.000000  | -18.485325 | -5.069440  |
| C | 0.000000  | -17.454241 | -4.420708  |
| C | 0.736531  | -25.326029 | -7.918981  |
| C | -0.736531 | -25.326029 | -7.918981  |
| C | 0.738424  | -39.413230 | -8.510149  |
| C | -0.738424 | -39.413230 | -8.510149  |
| C | 0.736637  | -32.507329 | 3.765806   |
| C | -0.736637 | -32.507329 | 3.765806   |
| B | 0.000000  | -32.534578 | -4.299979  |
| B | 0.000000  | -16.231500 | 5.728667   |
| C | 0.000000  | -16.228218 | 4.215646   |
| C | 0.000000  | -16.227639 | 2.987862   |
| C | 0.000000  | -17.548099 | 6.470683   |
| C | 0.000000  | -18.631068 | 7.049189   |
| C | 0.000000  | -31.200067 | -5.013089  |
| C | 0.000000  | -30.108895 | -5.575781  |
| C | 0.000000  | -32.566408 | -2.787436  |
| C | 0.000000  | -32.575201 | -1.559726  |
| C | 0.000000  | -29.066026 | 7.219886   |
| C | 0.000000  | -21.853650 | -7.104341  |
| C | 0.000000  | -22.906234 | -7.718182  |
| C | 0.000000  | -30.210355 | 6.493471   |
| C | 0.000000  | -31.234789 | 5.833666   |
| C | 0.000000  | -36.024770 | -6.438418  |
| C | 0.000000  | -34.869056 | -5.731161  |
| C | 0.000000  | -33.821963 | -5.089779  |
| C | 0.000000  | -12.643038 | 7.698484   |
| C | 0.000000  | -13.840231 | 7.064761   |
| C | 0.000000  | -14.918781 | 6.478162   |
| C | 0.000000  | -15.015868 | -4.423542  |
| C | 0.000000  | -13.985721 | -5.073734  |
| C | 0.000000  | -12.833551 | -5.786630  |
| C | 0.000000  | -11.784299 | -6.419437  |
| C | 0.000000  | -10.616574 | -7.107185  |
| C | 0.000000  | -9.562472  | -7.718403  |
| C | 0.000000  | -6.671034  | 9.288392   |
| C | 0.000000  | -5.617433  | 8.676309   |
| C | 0.000000  | -4.450185  | 7.987758   |
| C | 0.000000  | -3.401189  | 7.354526   |
| C | 0.000000  | -2.249311  | 6.641160   |
| C | 0.000000  | -1.219150  | 5.990985   |
| H | 0.000000  | 33.357566  | 5.658952   |
| B | 0.000000  | 38.340795  | -7.854950  |
| C | 0.000000  | 36.024770  | -6.438418  |
| C | 0.000000  | 37.069533  | -7.077765  |

|   |           |            |            |
|---|-----------|------------|------------|
| C | 0.738424  | 39.413230  | -8.510149  |
| C | -0.738424 | 39.413230  | -8.510149  |
| C | 0.000000  | 33.821963  | -5.089779  |
| C | 0.000000  | 34.869056  | -5.731161  |
| C | 0.000000  | 40.501351  | -9.174679  |
| H | 0.000000  | 40.539815  | -10.264534 |
| H | 0.000000  | 41.488284  | -8.711247  |
| H | 0.000000  | -33.357566 | 5.658952   |
| H | 0.000000  | -41.488284 | -8.711247  |

**POM-17**

E= -7688.25733942

v= 0.3924

|   |            |           |           |
|---|------------|-----------|-----------|
| B | 6.643561   | 34.894485 | 0.000000  |
| B | -3.485497  | 40.531050 | 0.000000  |
| C | -6.026626  | 40.343374 | 0.000000  |
| C | 7.822200   | 32.635296 | 0.000000  |
| H | 8.911620   | 32.551795 | 0.000000  |
| C | -0.779143  | 40.692681 | 0.000000  |
| C | -2.002712  | 40.631739 | 0.000000  |
| C | 5.948346   | 36.207828 | 0.000000  |
| C | 7.242206   | 33.785213 | 0.736519  |
| C | 7.242206   | 33.785213 | -0.736519 |
| C | -4.743539  | 40.456507 | 0.736638  |
| C | -4.743539  | 40.456507 | -0.736638 |
| B | 3.313693   | 40.829912 | 0.000000  |
| C | 1.801174   | 40.796181 | 0.000000  |
| C | 0.574232   | 40.751951 | 0.000000  |
| C | 5.355644   | 37.279996 | 0.000000  |
| C | 4.693072   | 38.461590 | 0.000000  |
| C | 4.083776   | 39.527436 | 0.000000  |
| B | -9.392333  | 30.008494 | 0.000000  |
| B | 0.800780   | 24.403058 | 0.000000  |
| B | -8.922599  | 17.970404 | 0.000000  |
| C | 3.360192   | 24.515979 | 0.000000  |
| C | -10.562561 | 32.271320 | 0.000000  |
| H | -11.651530 | 32.359712 | 0.000000  |
| C | -9.918537  | 15.625487 | 0.000000  |
| H | -10.997614 | 15.454385 | 0.000000  |
| C | -7.810951  | 20.443292 | 0.000000  |
| C | -8.327597  | 19.332527 | 0.000000  |
| C | -1.905491  | 24.284763 | 0.000000  |
| C | -0.681304  | 24.337858 | 0.000000  |
| C | -8.695217  | 28.695403 | 0.000000  |
| C | -9.141730  | 14.408701 | 0.000000  |
| C | -8.484208  | 13.382843 | 0.000000  |
| C | -7.745216  | 12.246852 | 0.000000  |
| C | -9.432683  | 16.818257 | 0.736687  |
| C | -9.432683  | 16.818257 | -0.736687 |
| C | -9.988435  | 31.118194 | 0.736807  |
| C | -9.988435  | 31.118194 | -0.736807 |
| C | 2.061551   | 24.458358 | 0.736301  |
| C | 2.061551   | 24.458358 | -0.736301 |
| B | 8.023598   | 2.451582  | 0.000000  |
| B | -2.211748  | 8.032665  | 0.000000  |
| B | 7.508035   | 14.467381 | 0.000000  |
| C | -4.771295  | 7.922599  | 0.000000  |
| C | 9.221223   | 0.202988  | 0.000000  |
| H | 10.311170  | 0.127553  | 0.000000  |
| C | 8.505231   | 16.811671 | 0.000000  |
| H | 9.584423   | 16.982031 | 0.000000  |
| C | 6.396161   | 11.994486 | 0.000000  |
| C | 6.912601   | 13.105343 | 0.000000  |
| C | 0.494651   | 8.148503  | 0.000000  |
| C | -0.729572  | 8.096168  | 0.000000  |
| C | 7.312603   | 3.756980  | 0.000000  |
| C | 6.333859   | 20.191510 | 0.000000  |
| C | 5.655729   | 21.212054 | 0.000000  |
| C | 4.893042   | 22.331893 | 0.000000  |
| C | 4.198477   | 23.332656 | 0.000000  |

|   |            |            |           |   |           |            |           |
|---|------------|------------|-----------|---|-----------|------------|-----------|
| C | 8.018755   | 15.619126  | 0.736714  | C | 7.810951  | -20.443292 | 0.000000  |
| C | 8.018755   | 15.619126  | -0.736714 | C | 8.327597  | -19.332527 | 0.000000  |
| C | 8.632482   | 1.348519   | 0.736676  | C | 1.905491  | -24.284763 | 0.000000  |
| C | 8.632482   | 1.348519   | -0.736676 | C | 0.681304  | -24.337858 | 0.000000  |
| C | -3.472593  | 7.978708   | 0.736300  | C | 8.695217  | -28.695403 | 0.000000  |
| C | -3.472593  | 7.978708   | -0.736300 | C | 7.745216  | -12.246852 | 0.000000  |
| B | 4.585858   | 8.323083   | 0.000000  | C | 7.066666  | -11.226586 | 0.000000  |
| B | -5.996839  | 24.112937  | 0.000000  | C | 6.303491  | -10.107081 | 0.000000  |
| C | -4.485063  | 24.174537  | 0.000000  | C | 5.608800  | -9.106401  | 0.000000  |
| C | -3.258381  | 24.226531  | 0.000000  | C | 9.432683  | -16.818257 | 0.736687  |
| C | -6.689339  | 22.769269  | 0.000000  | C | 9.432683  | -16.818257 | -0.736687 |
| C | -7.229189  | 21.666577  | 0.000000  | C | 9.988435  | -31.118194 | 0.736807  |
| C | 5.275866   | 9.667867   | 0.000000  | C | 9.988435  | -31.118194 | -0.736807 |
| C | 5.814851   | 10.771009  | 0.000000  | C | -2.061551 | -24.458358 | 0.736301  |
| C | 3.074244   | 8.258589   | 0.000000  | C | -2.061551 | -24.458358 | -0.736301 |
| C | 1.847574   | 8.206246   | 0.000000  | B | 5.996839  | -24.112937 | 0.000000  |
| C | -7.066666  | 11.226586  | 0.000000  | B | -4.585858 | -8.323083  | 0.000000  |
| C | 7.072216   | 19.055104  | 0.000000  | C | -3.074244 | -8.258589  | 0.000000  |
| C | 7.729156   | 18.028873  | 0.000000  | C | -1.847574 | -8.206246  | 0.000000  |
| C | -6.303491  | 10.107081  | 0.000000  | C | -5.275866 | -9.667867  | 0.000000  |
| C | -5.608800  | 9.106401   | 0.000000  | C | -5.814851 | -10.771009 | 0.000000  |
| C | 6.702805   | 4.819458   | 0.000000  | C | 6.689339  | -22.769269 | 0.000000  |
| C | 6.018982   | 5.988742   | 0.000000  | C | 7.229189  | -21.666577 | 0.000000  |
| C | 5.387869   | 7.041881   | 0.000000  | C | 4.485063  | -24.174537 | 0.000000  |
| C | -8.094470  | 27.627780  | 0.000000  | C | 3.258381  | -24.226531 | 0.000000  |
| C | -7.419437  | 26.453427  | 0.000000  | C | -5.655729 | -21.212054 | 0.000000  |
| C | -6.794709  | 25.396449  | 0.000000  | C | 8.484208  | -13.382843 | 0.000000  |
| C | 4.090709   | 25.768562  | 0.000000  | C | 9.141730  | -14.408701 | 0.000000  |
| C | 4.694211   | 26.826757  | 0.000000  | C | -4.893042 | -22.331893 | 0.000000  |
| C | 5.355700   | 28.009187  | 0.000000  | C | -4.198477 | -23.332656 | 0.000000  |
| C | 5.942412   | 29.084904  | 0.000000  | C | 8.094470  | -27.627780 | 0.000000  |
| C | 6.580468   | 30.280503  | 0.000000  | C | 7.419437  | -26.453427 | 0.000000  |
| C | 7.147707   | 31.358916  | 0.000000  | C | 6.794709  | -25.396449 | 0.000000  |
| C | -9.879707  | 33.543006  | 0.000000  | C | -6.702805 | -4.819458  | 0.000000  |
| C | -9.300449  | 34.615054  | 0.000000  | C | -6.018982 | -5.988742  | 0.000000  |
| C | -8.647928  | 35.803061  | 0.000000  | C | -5.387869 | -7.041881  | 0.000000  |
| C | -8.047076  | 36.870961  | 0.000000  | B | -6.643561 | -34.894485 | 0.000000  |
| C | -7.370637  | 38.045516  | 0.000000  | B | 3.485497  | -40.531050 | 0.000000  |
| C | -6.755489  | 39.097374  | 0.000000  | C | 6.026626  | -40.343374 | 0.000000  |
| B | -8.023598  | -2.451582  | 0.000000  | C | -7.822200 | -32.635296 | 0.000000  |
| B | 2.211748   | -8.032665  | 0.000000  | H | -8.911620 | -32.551795 | 0.000000  |
| B | -7.508035  | -14.467381 | 0.000000  | C | 0.779143  | -40.692681 | 0.000000  |
| C | 4.771295   | -7.922599  | 0.000000  | C | 2.002712  | -40.631739 | 0.000000  |
| C | -9.221223  | -0.202988  | 0.000000  | C | -5.948346 | -36.207828 | 0.000000  |
| H | -10.311170 | -0.127553  | 0.000000  | C | -7.242206 | -33.785213 | 0.736519  |
| C | -8.505231  | -16.811671 | 0.000000  | C | -7.242206 | -33.785213 | -0.736519 |
| H | -9.584423  | -16.982031 | 0.000000  | C | 4.743539  | -40.456507 | 0.736638  |
| C | -6.396161  | -11.994486 | 0.000000  | C | 4.743539  | -40.456507 | -0.736638 |
| C | -6.912601  | -13.105343 | 0.000000  | B | -3.313693 | -40.829912 | 0.000000  |
| C | -0.494651  | -8.148503  | 0.000000  | C | -1.801174 | -40.796181 | 0.000000  |
| C | 0.729572   | -8.096168  | 0.000000  | C | -0.574232 | -40.751951 | 0.000000  |
| C | -7.312603  | -3.756980  | 0.000000  | C | -5.355644 | -37.279996 | 0.000000  |
| C | -7.729156  | -18.028873 | 0.000000  | C | -4.693072 | -38.461590 | 0.000000  |
| C | -7.072216  | -19.055104 | 0.000000  | C | -4.083776 | -39.527436 | 0.000000  |
| C | -6.333859  | -20.191510 | 0.000000  | C | 6.755489  | -39.097374 | 0.000000  |
| C | -8.018755  | -15.619126 | 0.736714  | C | 7.370637  | -38.045516 | 0.000000  |
| C | -8.018755  | -15.619126 | -0.736714 | C | 8.047076  | -36.870961 | 0.000000  |
| C | -8.632482  | -1.348519  | 0.736676  | C | 8.647928  | -35.803061 | 0.000000  |
| C | -8.632482  | -1.348519  | -0.736676 | C | 9.300449  | -34.615054 | 0.000000  |
| C | 3.472593   | -7.978708  | 0.736300  | C | 9.879707  | -33.543006 | 0.000000  |
| C | 3.472593   | -7.978708  | -0.736300 | C | -7.147707 | -31.358916 | 0.000000  |
| B | 9.392333   | -30.008494 | 0.000000  | C | -6.580468 | -30.280503 | 0.000000  |
| B | -0.800780  | -24.403058 | 0.000000  | C | -5.942412 | -29.084904 | 0.000000  |
| B | 8.922599   | -17.970404 | 0.000000  | C | -5.355700 | -28.009187 | 0.000000  |
| C | -3.360192  | -24.515979 | 0.000000  | C | -4.694211 | -26.826757 | 0.000000  |
| C | 10.562561  | -32.271320 | 0.000000  | C | -4.090709 | -25.768562 | 0.000000  |
| H | 11.651530  | -32.359712 | 0.000000  | C | 5.502880  | -6.670513  | 0.000000  |
| C | 9.918537   | -15.625487 | 0.000000  | C | 6.106978  | -5.612673  | 0.000000  |
| H | 10.997614  | -15.454385 | 0.000000  | C | 6.768579  | -4.430311  | 0.000000  |

|   |           |            |           |
|---|-----------|------------|-----------|
| C | 7.354614  | -3.354236  | 0.000000  |
| C | 7.990329  | -2.157399  | 0.000000  |
| C | 8.554618  | -1.077447  | 0.000000  |
| C | -8.554618 | 1.077447   | 0.000000  |
| C | -7.990329 | 2.157399   | 0.000000  |
| C | -7.354614 | 3.354236   | 0.000000  |
| C | -6.768579 | 4.430311   | 0.000000  |
| C | -6.106978 | 5.612673   | 0.000000  |
| C | -5.502880 | 6.670513   | 0.000000  |
| H | 6.671049  | -41.225711 | 0.000000  |
| H | -6.671049 | 41.225711  | 0.000000  |
| B | 6.612191  | 46.785445  | 0.000000  |
| C | 5.298607  | 44.409532  | 0.000000  |
| C | 5.891569  | 45.481308  | 0.000000  |
| C | 7.219621  | 47.885668  | 0.738428  |
| C | 7.219621  | 47.885668  | -0.738428 |
| C | 4.047060  | 42.150152  | 0.000000  |
| C | 4.642281  | 43.224163  | 0.000000  |
| B | -6.612191 | -46.785445 | 0.000000  |
| C | -5.298607 | -44.409532 | 0.000000  |
| C | -5.891569 | -45.481308 | 0.000000  |
| C | -7.219621 | -47.885668 | 0.738428  |
| C | -7.219621 | -47.885668 | -0.738428 |
| C | -4.047060 | -42.150152 | 0.000000  |
| C | -4.642281 | -43.224163 | 0.000000  |
| C | -7.835836 | -49.001865 | 0.000000  |
| H | -8.922970 | -49.088037 | 0.000000  |
| H | -7.329386 | -49.967679 | 0.000000  |
| C | 7.835836  | 49.001865  | 0.000000  |
| H | 8.922970  | 49.088037  | 0.000000  |
| H | 7.329386  | 49.967679  | 0.000000  |

**POM-18**

E= -4974.00003776

v= 1.6153

|   |            |            |           |
|---|------------|------------|-----------|
| B | -5.844192  | -15.293367 | 0.000000  |
| B | 5.844192   | -15.293367 | 0.000000  |
| C | 8.005391   | -13.942750 | 0.000000  |
| C | -8.005391  | -13.942750 | 0.000000  |
| H | -8.986493  | -14.422139 | 0.000000  |
| B | 0.000000   | -18.782149 | 0.000000  |
| C | 4.581096   | -16.075954 | 0.000000  |
| C | -4.581096  | -16.075954 | 0.000000  |
| C | -6.922212  | -14.640047 | 0.736483  |
| C | -6.922212  | -14.640047 | -0.736483 |
| C | 6.922212   | -14.640047 | 0.736483  |
| C | 6.922212   | -14.640047 | -0.736483 |
| B | 5.890958   | -3.401146  | 0.000000  |
| B | -5.890958  | -3.401146  | 0.000000  |
| B | 0.000000   | 6.802292   | 0.000000  |
| C | -8.109212  | -4.681856  | 0.000000  |
| C | 8.109212   | -4.681856  | 0.000000  |
| C | 0.000000   | 9.363712   | 0.000000  |
| B | 0.000000   | 0.000000   | 0.000000  |
| C | 0.000000   | 1.511729   | 0.000000  |
| C | -4.606001  | -2.659276  | 0.000000  |
| C | 4.606001   | -2.659276  | 0.000000  |
| C | -4.515367  | 12.036196  | 0.000000  |
| C | -5.710595  | 12.674910  | 0.000000  |
| C | -6.791005  | 13.238368  | 0.000000  |
| C | 0.000000   | 8.063818   | 0.736582  |
| C | 0.000000   | 8.063818   | -0.736582 |
| C | 6.983471   | -4.031909  | 0.736582  |
| C | 6.983471   | -4.031909  | -0.736582 |
| C | -6.983471  | -4.031909  | 0.736582  |
| C | -6.983471  | -4.031909  | -0.736582 |
| B | -10.322349 | 12.707902  | 0.000000  |
| B | -16.166540 | 2.585465   | 0.000000  |
| C | -8.072080  | 13.904247  | 0.000000  |

|   |            |            |           |
|---|------------|------------|-----------|
| H | -7.996692  | 14.993601  | 0.000000  |
| C | -16.077471 | 0.038503   | 0.000000  |
| H | -16.983185 | -0.571462  | 0.000000  |
| C | -16.265818 | 9.391074   | 0.000000  |
| C | -16.261289 | 7.878017   | 0.000000  |
| C | -11.631636 | 12.005322  | 0.000000  |
| C | -14.860266 | -0.738001  | 0.000000  |
| C | -13.832091 | -1.391934  | 0.000000  |
| C | -12.681335 | -2.107676  | 0.000000  |
| C | -16.139759 | 1.325212   | 0.736483  |
| C | -16.139759 | 1.325212   | -0.736483 |
| C | -9.217546  | 13.314835  | 0.736483  |
| C | -9.217546  | 13.314835  | -0.736483 |
| B | 10.322349  | 12.707902  | 0.000000  |
| B | 16.166540  | 2.585465   | 0.000000  |
| C | 8.072080   | 13.904247  | 0.000000  |
| H | 7.996692   | 14.993601  | 0.000000  |
| C | 16.077471  | 0.038503   | 0.000000  |
| B | 16.265818  | 9.391074   | 0.000000  |
| C | 16.261289  | 7.878017   | 0.000000  |
| C | 11.631636  | 12.005322  | 0.000000  |
| C | 16.139759  | 1.325212   | 0.736483  |
| C | 16.139759  | 1.325212   | -0.736483 |
| C | 9.217546   | 13.314835  | 0.736483  |
| C | 9.217546   | 13.314835  | -0.736483 |
| C | 8.069261   | -12.500367 | 0.000000  |
| C | 8.121496   | -11.282975 | 0.000000  |
| C | 8.165969   | -9.928520  | 0.000000  |
| C | -8.165969  | -9.928520  | 0.000000  |
| C | -8.121496  | -11.282975 | 0.000000  |
| C | -8.069261  | -12.500367 | 0.000000  |
| C | 14.860266  | -0.738001  | 0.000000  |
| C | 13.832091  | -1.391934  | 0.000000  |
| C | 12.681335  | -2.107676  | 0.000000  |
| C | 6.791005   | 13.238368  | 0.000000  |
| C | 5.710595   | 12.674910  | 0.000000  |
| C | 4.515367   | 12.036196  | 0.000000  |
| H | 8.986493   | -14.422139 | 0.000000  |
| H | 16.983185  | -0.571462  | 0.000000  |
| C | -16.250960 | 6.650329   | 0.000000  |
| C | -16.232950 | 5.295700   | 0.000000  |
| C | -16.212732 | 4.070631   | 0.000000  |
| C | 0.000000   | 2.739453   | 0.000000  |
| C | 0.000000   | 4.093431   | 0.000000  |
| C | 0.000000   | 5.318552   | 0.000000  |
| C | 16.250960  | 6.650329   | 0.000000  |
| C | 16.232950  | 5.295700   | 0.000000  |
| C | 16.212732  | 4.070631   | 0.000000  |
| C | -8.189734  | -8.703219  | 0.000000  |
| C | -8.189019  | -7.348335  | 0.000000  |
| C | -8.173149  | -6.130250  | 0.000000  |
| C | 8.189734   | -8.703219  | 0.000000  |
| C | 8.189019   | -7.348335  | 0.000000  |
| C | 8.173149   | -6.130250  | 0.000000  |
| C | -12.702685 | 11.410297  | 0.000000  |
| C | -13.884834 | 10.748580  | 0.000000  |
| C | -14.953207 | 10.143681  | 0.000000  |
| C | -3.545015  | -2.046715  | 0.000000  |
| C | -2.372436  | -1.369727  | 0.000000  |
| C | -1.309196  | -0.755865  | 0.000000  |
| C | 3.530265   | -16.705997 | 0.000000  |
| C | 2.366126   | -17.398909 | 0.000000  |
| C | 1.308082   | -18.021697 | 0.000000  |
| C | -3.442342  | 11.444127  | 0.000000  |
| C | -2.269335  | 10.766066  | 0.000000  |
| C | -1.222378  | 10.143280  | 0.000000  |
| C | -11.632076 | -2.740908  | 0.000000  |
| C | -10.458354 | -3.417731  | 0.000000  |
| C | -9.395527  | -4.013030  | 0.000000  |

|   |            |            |           |
|---|------------|------------|-----------|
| C | 12.702685  | 11.410297  | 0.000000  |
| C | 13.884834  | 10.748580  | 0.000000  |
| C | 14.953207  | 10.143681  | 0.000000  |
| C | 3.545015   | -2.046715  | 0.000000  |
| C | 2.372436   | -1.369727  | 0.000000  |
| C | 1.309196   | -0.755865  | 0.000000  |
| C | -3.530265  | -16.705997 | 0.000000  |
| C | -2.366126  | -17.398909 | 0.000000  |
| C | -1.308082  | -18.021697 | 0.000000  |
| C | 3.442342   | 11.444127  | 0.000000  |
| C | 2.269335   | 10.766066  | 0.000000  |
| C | 1.222378   | 10.143280  | 0.000000  |
| C | 11.632076  | -2.740908  | 0.000000  |
| C | 10.458354  | -3.417731  | 0.000000  |
| C | 9.395527   | -4.013030  | 0.000000  |
| B | 22.161598  | 12.795005  | 0.000000  |
| C | 24.354177  | 14.060891  | 0.000000  |
| H | 24.418976  | 15.149480  | 0.000000  |
| C | 17.573586  | 10.146114  | 0.000000  |
| C | 23.249904  | 13.423338  | -0.738467 |
| C | 23.249904  | 13.423338  | 0.738467  |
| C | 18.637016  | 10.760086  | 0.000000  |
| C | 19.810414  | 11.437548  | 0.000000  |
| C | 20.871181  | 12.049982  | 0.000000  |
| B | 0.000000   | -25.590010 | 0.000000  |
| C | 0.000000   | -28.121781 | 0.000000  |
| H | -0.910346  | -28.722194 | 0.000000  |
| C | 0.000000   | -20.292229 | 0.000000  |
| C | 0.000000   | -26.846676 | 0.738467  |
| C | 0.000000   | -26.846676 | -0.738467 |
| C | 0.000000   | -21.520173 | 0.000000  |
| C | 0.000000   | -22.875095 | 0.000000  |
| C | 0.000000   | -24.099964 | 0.000000  |
| B | -22.161598 | 12.795005  | 0.000000  |
| C | -24.354177 | 14.060891  | 0.000000  |
| H | -25.329323 | 13.572714  | 0.000000  |
| C | -17.573586 | 10.146114  | 0.000000  |
| C | -23.249904 | 13.423338  | -0.738467 |
| C | -23.249904 | 13.423338  | 0.738467  |
| C | -18.637016 | 10.760086  | 0.000000  |
| C | -19.810414 | 11.437548  | 0.000000  |
| C | -20.871181 | 12.049982  | 0.000000  |
| H | -24.418976 | 15.149480  | 0.000000  |
| H | 25.329323  | 13.572714  | 0.000000  |
| H | 0.910346   | -28.722194 | 0.000000  |

**POM-19**

E= -761.729665232

v= 27.6593

|   |           |           |           |
|---|-----------|-----------|-----------|
| B | 0.000000  | 4.273338  | 0.000000  |
| B | 1.438401  | 3.442396  | 0.000000  |
| B | -1.438401 | 3.442396  | 0.000000  |
| C | 3.592077  | 2.052377  | 0.000000  |
| H | 4.582374  | 2.512053  | 0.000000  |
| C | -3.592077 | 2.052377  | 0.000000  |
| H | -4.582374 | 2.512053  | 0.000000  |
| B | 0.000000  | -4.273338 | 0.000000  |
| B | 1.438401  | -3.442396 | 0.000000  |
| B | -1.438401 | -3.442396 | 0.000000  |
| C | -3.592077 | -2.052377 | 0.000000  |
| H | -4.582374 | -2.512053 | 0.000000  |
| C | 3.592077  | -2.052377 | 0.000000  |
| H | 4.582374  | -2.512053 | 0.000000  |
| C | 3.619162  | 0.604857  | 0.000000  |
| C | 3.619162  | -0.604857 | 0.000000  |
| C | -3.619162 | 0.604857  | 0.000000  |
| C | -3.619162 | -0.604857 | 0.000000  |
| C | -2.517542 | 2.770505  | 0.729719  |
| C | -2.517542 | 2.770505  | -0.729719 |
| C | -2.517542 | -2.770505 | 0.729719  |

|   |           |           |           |
|---|-----------|-----------|-----------|
| C | -2.517542 | -2.770505 | -0.729719 |
| C | 2.517542  | -2.770505 | 0.729719  |
| C | 2.517542  | -2.770505 | -0.729719 |
| C | 2.517542  | 2.770505  | 0.729719  |
| C | 2.517542  | 2.770505  | -0.729719 |
| H | 0.000000  | 5.468497  | 0.000000  |
| H | 0.000000  | -5.468497 | 0.000000  |

**POM-20**

E= -1357.18762303

v= 13.4673

|   |           |           |           |
|---|-----------|-----------|-----------|
| B | 0.000000  | 0.000000  | -2.204601 |
| B | 0.000000  | 0.000000  | -0.545049 |
| B | 0.000000  | 1.458865  | -2.992157 |
| B | 0.000000  | -1.458865 | -2.992157 |
| C | 0.000000  | 3.764079  | -4.110331 |
| H | 0.000000  | 3.886637  | -5.195153 |
| C | 0.000000  | 0.000000  | 2.029737  |
| C | 0.000000  | -3.764079 | -4.110331 |
| H | 0.000000  | -3.886637 | -5.195153 |
| B | 0.000000  | -7.281358 | 2.251819  |
| B | 0.000000  | -5.821584 | 3.044893  |
| B | 0.000000  | -7.325504 | 0.591348  |
| C | 0.000000  | -3.514492 | 4.161243  |
| H | 0.000000  | -3.391262 | 5.246023  |
| C | 0.000000  | -1.226423 | 2.810613  |
| C | 0.000000  | -2.262687 | 3.433502  |
| C | 0.000000  | -5.014014 | -3.380216 |
| C | 0.000000  | -6.046408 | -2.749711 |
| B | 0.000000  | 7.281358  | 2.251819  |
| B | 0.000000  | 5.821584  | 3.044893  |
| B | 0.000000  | 7.325504  | 0.591348  |
| C | 0.000000  | 3.514492  | 4.161243  |
| H | 0.000000  | 3.391262  | 5.246023  |
| C | 0.000000  | 7.267029  | -1.971115 |
| H | 0.000000  | 8.176223  | -2.575468 |
| C | 0.000000  | 6.046408  | -2.749711 |
| C | 0.000000  | 2.262687  | 3.433502  |
| C | 0.000000  | 1.226423  | 2.810613  |
| C | 0.000000  | 5.014014  | -3.380216 |
| C | -0.729727 | 7.317488  | -0.679743 |
| C | 0.729727  | 7.317488  | -0.679743 |
| C | -0.729709 | 2.591379  | -3.566760 |
| C | 0.729709  | 2.591379  | -3.566760 |
| C | -0.729655 | 4.685564  | 3.615710  |
| C | 0.729655  | 4.685564  | 3.615710  |
| C | -0.729307 | 0.000000  | 0.726448  |
| C | 0.729307  | 0.000000  | 0.726448  |
| C | -0.729655 | -4.685564 | 3.615710  |
| C | 0.729655  | -4.685564 | 3.615710  |
| C | 0.729709  | -2.591379 | -3.566760 |
| C | -0.729709 | -2.591379 | -3.566760 |
| C | 0.729727  | -7.317488 | -0.679743 |
| C | -0.729727 | -7.317488 | -0.679743 |
| C | 0.000000  | -7.267029 | -1.971115 |
| H | 0.000000  | -8.176223 | -2.575468 |
| H | 0.000000  | -8.299989 | 2.876919  |
| H | 0.000000  | 8.299989  | 2.876919  |

**POM-21**

E= -1952.64550712

v= 6.7677

|   |           |          |          |
|---|-----------|----------|----------|
| B | -2.206105 | 3.649010 | 0.000000 |
| B | -0.546661 | 3.641424 | 0.000000 |
| B | -2.986710 | 5.111640 | 0.000000 |
| B | -3.002229 | 2.194681 | 0.000000 |
| C | -4.093512 | 7.422171 | 0.000000 |
| H | -5.177720 | 7.549978 | 0.000000 |

|   |           |            |           |
|---|-----------|------------|-----------|
| C | 2.027991  | 3.629495   | 0.000000  |
| C | -4.137398 | -0.101940  | 0.000000  |
| H | -5.222975 | -0.217438  | 0.000000  |
| B | 2.206105  | -3.649010  | 0.000000  |
| B | 3.002229  | -2.194681  | 0.000000  |
| B | 0.546661  | -3.641424  | 0.000000  |
| B | 2.986710  | -5.111640  | 0.000000  |
| C | -2.027991 | -3.629495  | 0.000000  |
| C | 4.137398  | 0.101940   | 0.000000  |
| H | 5.222975  | 0.217438   | 0.000000  |
| C | 4.093512  | -7.422171  | 0.000000  |
| H | 5.177720  | -7.549978  | 0.000000  |
| C | 2.802124  | 2.398748   | 0.000000  |
| C | 3.418343  | 1.358524   | 0.000000  |
| C | -3.418343 | -1.358524  | 0.000000  |
| C | -2.802124 | -2.398748  | 0.000000  |
| B | -2.285426 | -10.909290 | 0.000000  |
| B | -0.625190 | -10.961237 | 0.000000  |
| B | -3.071546 | -9.445749  | 0.000000  |
| C | 1.937486  | -10.914760 | 0.000000  |
| H | 2.537680  | -11.826709 | 0.000000  |
| C | -4.176796 | -7.133323  | 0.000000  |
| H | -5.260969 | -7.004840  | 0.000000  |
| C | -2.815109 | -4.851791  | 0.000000  |
| C | 3.357224  | -8.668431  | 0.000000  |
| C | 2.721728  | -9.697754  | 0.000000  |
| C | -3.443070 | -5.884981  | 0.000000  |
| B | 2.285426  | 10.909290  | 0.000000  |
| B | 3.071546  | 9.445749   | 0.000000  |
| B | 0.625190  | 10.961237  | 0.000000  |
| C | 4.176796  | 7.133323   | 0.000000  |
| H | 5.260969  | 7.004840   | 0.000000  |
| C | -1.937486 | 10.914760  | 0.000000  |
| H | -2.537680 | 11.826709  | 0.000000  |
| C | -2.721728 | 9.697754   | 0.000000  |
| C | 3.443070  | 5.884981   | 0.000000  |
| C | 2.815109  | 4.851791   | 0.000000  |
| C | -3.357224 | 8.668431   | 0.000000  |
| C | -0.645912 | 10.959300  | 0.729725  |
| C | -0.645912 | 10.959300  | -0.729725 |
| C | -3.555731 | 6.246786   | 0.729746  |
| C | -3.555731 | 6.246786   | -0.729746 |
| C | 3.636767  | 8.306902   | 0.729644  |
| C | 3.636767  | 8.306902   | -0.729644 |
| C | 0.724744  | 3.635539   | 0.729319  |
| C | 0.724744  | 3.635539   | -0.729319 |
| C | 3.584006  | -1.065602  | 0.729637  |
| C | 3.584006  | -1.065602  | -0.729637 |
| C | -3.584006 | 1.065602   | -0.729637 |
| C | -3.584006 | 1.065602   | 0.729637  |
| C | -3.636767 | -8.306902  | 0.729644  |
| C | -3.636767 | -8.306902  | -0.729644 |
| C | -0.724744 | -3.635539  | -0.729319 |
| C | -0.724744 | -3.635539  | 0.729319  |
| C | 3.555731  | -6.246786  | 0.729746  |
| C | 3.555731  | -6.246786  | -0.729746 |
| C | 0.645912  | -10.959300 | 0.729725  |
| C | 0.645912  | -10.959300 | -0.729725 |
| H | -2.915305 | -11.924857 | 0.000000  |
| H | 2.915305  | 11.924857  | 0.000000  |

**POM-22**

E= -2548.10338019

v= 4.1604

|   |          |           |          |
|---|----------|-----------|----------|
| B | 0.000000 | 7.277058  | 2.213311 |
| B | 0.000000 | 7.277119  | 0.553865 |
| B | 0.000000 | 8.735817  | 3.001095 |
| B | 0.000000 | 5.818980  | 3.002638 |
| C | 0.000000 | 11.040876 | 4.119205 |

|   |           |            |           |
|---|-----------|------------|-----------|
| H | 0.000000  | 11.163327  | 5.204024  |
| C | 0.000000  | 7.277205   | -2.020804 |
| C | 0.000000  | 3.517084   | 4.127087  |
| H | 0.000000  | 3.396394   | 5.212097  |
| B | 0.000000  | 0.000000   | -2.233507 |
| B | 0.000000  | 1.458046   | -3.022885 |
| B | 0.000000  | 0.000000   | -0.574150 |
| B | 0.000000  | -1.458046  | -3.022885 |
| C | 0.000000  | 0.000000   | 2.000424  |
| C | 0.000000  | 3.759866   | -4.147132 |
| H | 0.000000  | 3.880438   | -5.232148 |
| C | 0.000000  | -3.759866  | -4.147132 |
| H | 0.000000  | -3.880438  | -5.232148 |
| C | 0.000000  | 6.050131   | -2.800767 |
| C | 0.000000  | 5.012928   | -3.422046 |
| C | 0.000000  | 2.263890   | 3.402056  |
| C | 0.000000  | 1.226684   | 2.780783  |
| B | 0.000000  | -7.277058  | 2.213311  |
| B | 0.000000  | -7.277119  | 0.553865  |
| B | 0.000000  | -8.735817  | 3.001095  |
| B | 0.000000  | -5.818980  | 3.002638  |
| C | 0.000000  | -11.040876 | 4.119205  |
| H | 0.000000  | -11.163327 | 5.204024  |
| C | 0.000000  | -7.277205  | -2.020804 |
| C | 0.000000  | -3.517084  | 4.127087  |
| H | 0.000000  | -3.396394  | 5.212097  |
| C | 0.000000  | -1.226684  | 2.780783  |
| C | 0.000000  | -5.012928  | -3.422046 |
| C | 0.000000  | -6.050131  | -2.800767 |
| C | 0.000000  | -2.263890  | 3.402056  |
| C | 0.729753  | -9.868159  | 3.575602  |
| C | -0.729753 | -9.868159  | 3.575602  |
| B | 0.000000  | 14.558036  | -2.243170 |
| B | 0.000000  | 13.098217  | -3.036260 |
| B | 0.000000  | 14.601988  | -0.582665 |
| C | 0.000000  | 10.791246  | -4.152870 |
| H | 0.000000  | 10.667999  | -5.237640 |
| C | 0.000000  | 14.543657  | 1.979779  |
| H | 0.000000  | 15.452825  | 2.584157  |
| C | 0.000000  | 13.323015  | 2.758380  |
| C | 0.000000  | 9.539379   | -3.425126 |
| C | 0.000000  | 8.503205   | -2.802105 |
| C | 0.000000  | 12.290702  | 3.389009  |
| C | 0.729723  | 14.594056  | 0.688419  |
| C | -0.729723 | 14.594056  | 0.688419  |
| C | 0.729753  | 9.868159   | 3.575602  |
| C | -0.729753 | 9.868159   | 3.575602  |
| C | 0.729638  | 11.962159  | -3.607098 |
| C | -0.729638 | 11.962159  | -3.607098 |
| C | 0.729319  | 7.277024   | -0.717549 |
| C | -0.729319 | 7.277024   | -0.717549 |
| C | 0.729676  | 2.589687   | -3.599298 |
| C | -0.729676 | 2.589687   | -3.599298 |
| C | -0.729624 | 4.687133   | 3.579104  |
| C | 0.729624  | 4.687133   | 3.579104  |
| C | 0.729624  | -4.687133  | 3.579104  |
| C | -0.729624 | -4.687133  | 3.579104  |
| C | -0.729331 | 0.000000   | 0.697190  |
| C | 0.729331  | 0.000000   | 0.697190  |
| C | 0.729676  | -2.589687  | -3.599298 |
| C | -0.729676 | -2.589687  | -3.599298 |
| C | 0.729319  | -7.277024  | -0.717549 |
| C | -0.729319 | -7.277024  | -0.717549 |
| B | 0.000000  | -14.558036 | -2.243170 |
| B | 0.000000  | -13.098217 | -3.036260 |
| B | 0.000000  | -14.601988 | -0.582665 |
| C | 0.000000  | -14.543657 | 1.979779  |
| C | 0.000000  | -10.791246 | -4.152870 |
| H | 0.000000  | -10.667999 | -5.237640 |

|   |           |            |           |
|---|-----------|------------|-----------|
| C | 0.000000  | -8.503205  | -2.802105 |
| C | 0.000000  | -9.539379  | -3.425126 |
| C | 0.000000  | -12.290702 | 3.389009  |
| C | 0.000000  | -13.323015 | 2.758380  |
| C | 0.729638  | -11.962159 | -3.607098 |
| C | -0.729638 | -11.962159 | -3.607098 |
| C | -0.729723 | -14.594056 | 0.688419  |
| C | 0.729723  | -14.594056 | 0.688419  |
| H | 0.000000  | -15.452825 | 2.584157  |
| H | 0.000000  | -15.576709 | -2.868258 |
| H | 0.000000  | 15.576709  | -2.868258 |

**POM-23**

E= -3143.56125107

v= 2.7560

|   |           |            |           |
|---|-----------|------------|-----------|
| B | -2.228946 | 3.634742   | 0.000000  |
| B | -0.569590 | 3.637165   | 0.000000  |
| B | -3.020382 | 5.091671   | 0.000000  |
| B | -3.016364 | 2.175613   | 0.000000  |
| C | -4.147884 | 7.391865   | 0.000000  |
| H | -5.233065 | 7.510911   | 0.000000  |
| C | 2.004954  | 3.641154   | 0.000000  |
| C | -4.137567 | -0.127701  | 0.000000  |
| H | -5.222382 | -0.249986  | 0.000000  |
| B | 2.228946  | -3.634742  | 0.000000  |
| B | 3.016364  | -2.175613  | 0.000000  |
| B | 0.569590  | -3.637165  | 0.000000  |
| B | 3.020382  | -5.091671  | 0.000000  |
| C | -2.004954 | -3.641154  | 0.000000  |
| C | 4.137567  | 0.127701   | 0.000000  |
| H | 5.222382  | 0.249986   | 0.000000  |
| C | 4.147884  | -7.391865  | 0.000000  |
| H | 5.233065  | -7.510911  | 0.000000  |
| C | 2.787354  | 2.415739   | 0.000000  |
| C | 3.410476  | 1.379649   | 0.000000  |
| C | -3.410476 | -1.379649  | 0.000000  |
| C | -2.787354 | -2.415739  | 0.000000  |
| B | -2.207424 | -10.918386 | 0.000000  |
| B | -0.547951 | -10.916027 | 0.000000  |
| B | -2.992409 | -12.378659 | 0.000000  |
| B | -2.998917 | -9.461514  | 0.000000  |
| C | -4.106086 | -14.685847 | 0.000000  |
| H | -5.190686 | -14.810267 | 0.000000  |
| C | 2.026698  | -10.912327 | 0.000000  |
| C | -4.126651 | -7.161231  | 0.000000  |
| H | -5.211817 | -7.041981  | 0.000000  |
| C | -2.783424 | -4.869006  | 0.000000  |
| C | 3.424564  | -8.645927  | 0.000000  |
| C | 2.804788  | -9.684028  | 0.000000  |
| C | -3.403272 | -5.907062  | 0.000000  |
| C | -3.564680 | -13.512119 | 0.729757  |
| C | -3.564680 | -13.512119 | -0.729757 |
| B | 2.207424  | 10.918386  | 0.000000  |
| B | 2.992409  | 12.378659  | 0.000000  |
| B | 2.998917  | 9.461514   | 0.000000  |
| B | 0.547951  | 10.916027  | 0.000000  |
| C | 4.126651  | 7.161231   | 0.000000  |
| H | 5.211817  | 7.041981   | 0.000000  |
| C | 4.106086  | 14.685847  | 0.000000  |
| H | 5.190686  | 14.810267  | 0.000000  |
| C | -2.026698 | 10.912327  | 0.000000  |
| C | -2.804788 | 9.684028   | 0.000000  |
| C | 3.403272  | 5.907062   | 0.000000  |
| C | 2.783424  | 4.869006   | 0.000000  |
| C | -3.424564 | 8.645927   | 0.000000  |
| C | 3.564680  | 13.512119  | -0.729757 |
| C | 3.564680  | 13.512119  | 0.729757  |
| C | -0.723444 | 10.914119  | 0.729316  |
| C | -0.723444 | 10.914119  | -0.729316 |
| C | -3.598401 | 6.222453   | 0.729685  |

|   |           |            |           |
|---|-----------|------------|-----------|
| C | -3.598401 | 6.222453   | -0.729685 |
| C | 3.577050  | 8.330502   | 0.729621  |
| C | 3.577050  | 8.330502   | -0.729621 |
| C | 0.701745  | 3.638956   | 0.729332  |
| C | 0.701745  | 3.638956   | -0.729332 |
| C | 3.591356  | -1.043188  | 0.729665  |
| C | 3.591356  | -1.043188  | -0.729665 |
| C | -3.591356 | 1.043188   | -0.729665 |
| C | -3.591356 | 1.043188   | 0.729665  |
| C | -3.577050 | -8.330502  | 0.729621  |
| C | -3.577050 | -8.330502  | -0.729621 |
| C | -0.701745 | -3.638956  | -0.729332 |
| C | -0.701745 | -3.638956  | 0.729332  |
| C | 3.598401  | -6.222453  | 0.729685  |
| C | 3.598401  | -6.222453  | -0.729685 |
| C | 0.723444  | -10.914119 | 0.729316  |
| C | 0.723444  | -10.914119 | -0.729316 |
| B | 2.261947  | -18.192814 | 0.000000  |
| B | 3.052635  | -16.731737 | 0.000000  |
| B | 0.601565  | -18.239670 | 0.000000  |
| C | -1.960941 | -18.185104 | 0.000000  |
| C | 4.164838  | -14.422654 | 0.000000  |
| H | 5.249391  | -14.297388 | 0.000000  |
| C | 2.810054  | -12.137008 | 0.000000  |
| C | 3.434873  | -13.172098 | 0.000000  |
| C | -3.373701 | -15.934382 | 0.000000  |
| C | -2.741399 | -16.965669 | 0.000000  |
| C | 3.621304  | -15.594596 | 0.729641  |
| C | 3.621304  | -15.594596 | -0.729641 |
| C | -0.669520 | -18.233703 | -0.729726 |
| C | -0.669520 | -18.233703 | 0.729726  |
| H | -2.563997 | -19.095167 | 0.000000  |
| B | -2.261947 | 18.192814  | 0.000000  |
| B | -0.601565 | 18.239670  | 0.000000  |
| B | -3.052635 | 16.731737  | 0.000000  |
| C | -4.164838 | 14.422654  | 0.000000  |
| H | -5.249391 | 14.297388  | 0.000000  |
| C | -3.621304 | 15.594596  | 0.729641  |
| C | -3.621304 | 15.594596  | -0.729641 |
| C | 0.669520  | 18.233703  | 0.729726  |
| C | 0.669520  | 18.233703  | -0.729726 |
| C | 2.741399  | 16.965669  | 0.000000  |
| C | 3.373701  | 15.934382  | 0.000000  |
| C | -3.434873 | 13.172098  | 0.000000  |
| C | -2.810054 | 12.137008  | 0.000000  |
| C | 1.960941  | 18.185104  | 0.000000  |
| H | 2.563997  | 19.095167  | 0.000000  |
| H | 2.888686  | -19.210309 | 0.000000  |
| H | -2.888686 | 19.210309  | 0.000000  |

**POM-24**

E= -1812.98471046

v= 12.6159

|   |           |           |          |
|---|-----------|-----------|----------|
| B | 0.000000  | 0.000000  | 0.000000 |
| B | 0.000000  | 1.656033  | 0.000000 |
| B | -1.434167 | -0.828017 | 0.000000 |
| B | 1.434167  | -0.828017 | 0.000000 |
| C | -3.662775 | -2.114704 | 0.000000 |
| C | 0.000000  | 4.229408  | 0.000000 |
| C | 3.662775  | -2.114704 | 0.000000 |
| B | 7.256363  | 4.189463  | 0.000000 |
| B | 5.825403  | 5.034126  | 0.000000 |
| B | 7.272383  | 2.527884  | 0.000000 |
| C | 3.572925  | 6.257804  | 0.000000 |
| H | 3.499929  | 7.347043  | 0.000000 |
| C | 1.232266  | 5.000593  | 0.000000 |
| C | 2.290296  | 5.585773  | 0.000000 |
| C | 4.946774  | -1.433123 | 0.000000 |
| C | 5.982569  | -0.809432 | 0.000000 |
| B | -7.256363 | 4.189463  | 0.000000 |

|   |           |           |           |
|---|-----------|-----------|-----------|
| B | -5.825403 | 5.034126  | 0.000000  |
| B | -7.272383 | 2.527884  | 0.000000  |
| C | -3.572925 | 6.257804  | 0.000000  |
| H | -3.499929 | 7.347043  | 0.000000  |
| C | -7.205879 | -0.034658 | 0.000000  |
| H | -8.112690 | -0.642494 | 0.000000  |
| C | -5.982569 | -0.809432 | 0.000000  |
| C | -2.290296 | 5.585773  | 0.000000  |
| C | -1.232266 | 5.000593  | 0.000000  |
| C | -4.946774 | -1.433123 | 0.000000  |
| C | -7.259034 | 1.256408  | 0.729645  |
| C | -7.259034 | 1.256408  | -0.729645 |
| C | -2.534198 | -1.463120 | 0.729703  |
| C | -2.534198 | -1.463120 | -0.729703 |
| C | -4.717598 | 5.658304  | 0.729645  |
| C | -4.717598 | 5.658304  | -0.729645 |
| C | 0.000000  | 2.926240  | 0.729703  |
| C | 0.000000  | 2.926240  | -0.729703 |
| C | 4.717598  | 5.658304  | 0.729645  |
| C | 4.717598  | 5.658304  | -0.729645 |
| C | 2.534198  | -1.463120 | -0.729703 |
| C | 2.534198  | -1.463120 | 0.729703  |
| C | 7.259034  | 1.256408  | -0.729645 |
| C | 7.259034  | 1.256408  | 0.729645  |
| C | 7.205879  | -0.034658 | 0.000000  |
| H | 8.112690  | -0.642494 | 0.000000  |
| B | 0.000000  | -8.378926 | 0.000000  |
| B | -1.446979 | -7.562010 | 0.000000  |
| B | 1.446979  | -7.562010 | 0.000000  |
| C | 3.632954  | -6.223146 | 0.000000  |
| C | -3.632954 | -6.223146 | 0.000000  |
| H | -4.612761 | -6.704549 | 0.000000  |
| C | -2.541436 | -6.914711 | -0.729645 |
| C | -2.541436 | -6.914711 | 0.729645  |
| C | 2.541436  | -6.914711 | 0.729645  |
| C | 2.541436  | -6.914711 | -0.729645 |
| C | -3.692274 | -4.776341 | 0.000000  |
| C | -3.714508 | -3.567470 | 0.000000  |
| C | 3.692274  | -4.776341 | 0.000000  |
| C | 3.714508  | -3.567470 | 0.000000  |
| H | 4.612761  | -6.704549 | 0.000000  |
| H | 8.291769  | 4.787255  | 0.000000  |
| H | 0.000000  | -9.574510 | 0.000000  |
| H | -8.291769 | 4.787255  | 0.000000  |

**POM-25**

E= -1218.79931015  
v= 11.1423

|   |           |           |           |
|---|-----------|-----------|-----------|
| B | -4.729096 | 3.631369  | 0.000000  |
| B | -4.729096 | -3.631369 | 0.000000  |
| C | -3.341961 | 5.768560  | 0.000000  |
| H | -3.800496 | 6.759990  | 0.000000  |
| C | -3.341961 | -5.768560 | 0.000000  |
| H | -3.800496 | -6.759990 | 0.000000  |
| B | -6.882103 | 0.000000  | 0.000000  |
| C | -6.131988 | -1.307684 | 0.000000  |
| C | -5.517916 | -2.368410 | 0.000000  |
| C | -6.131988 | 1.307684  | 0.000000  |
| C | -5.517916 | 2.368410  | 0.000000  |
| C | -1.897654 | -5.797896 | 0.000000  |
| C | -0.681550 | -5.812452 | 0.000000  |
| C | 0.681550  | -5.812452 | 0.000000  |
| C | 1.897654  | -5.797896 | 0.000000  |
| C | -4.062072 | -4.700132 | 0.735687  |
| C | -4.062072 | -4.700132 | -0.735687 |
| C | -4.062072 | 4.700132  | 0.735687  |
| C | -4.062072 | 4.700132  | -0.735687 |
| B | 4.729096  | -3.631369 | 0.000000  |
| B | 4.729096  | 3.631369  | 0.000000  |

|   |           |           |           |
|---|-----------|-----------|-----------|
| C | 3.341961  | -5.768560 | 0.000000  |
| H | 3.800496  | -6.759990 | 0.000000  |
| C | 3.341961  | 5.768560  | 0.000000  |
| H | 3.800496  | 6.759990  | 0.000000  |
| B | 6.882103  | 0.000000  | 0.000000  |
| C | 6.131988  | 1.307684  | 0.000000  |
| C | 5.517916  | 2.368410  | 0.000000  |
| C | 6.131988  | -1.307684 | 0.000000  |
| C | 5.517916  | -2.368410 | 0.000000  |
| C | 1.897654  | 5.797896  | 0.000000  |
| C | 0.681550  | 5.812452  | 0.000000  |
| C | -0.681550 | 5.812452  | 0.000000  |
| C | -1.897654 | 5.797896  | 0.000000  |
| C | 4.062072  | 4.700132  | 0.735687  |
| C | 4.062072  | 4.700132  | -0.735687 |
| C | 4.062072  | -4.700132 | 0.735687  |
| C | 4.062072  | -4.700132 | -0.735687 |
| H | -8.075122 | 0.000000  | 0.000000  |
| H | 8.075122  | 0.000000  | 0.000000  |

**POM-26**

E= -2195.12860135  
v= 4.9799

|   |           |            |           |
|---|-----------|------------|-----------|
| B | 0.000000  | 8.015479   | 5.587055  |
| B | 0.000000  | 11.802040  | -0.611989 |
| C | 0.000000  | 11.735122  | -3.158908 |
| C | 0.000000  | 5.719756   | 6.692116  |
| H | 0.000000  | 5.595907   | 7.777414  |
| B | 0.000000  | 11.745131  | 3.609189  |
| C | 0.000000  | 11.786707  | 2.102330  |
| C | 0.000000  | 11.815725  | 0.877023  |
| C | 0.000000  | 10.423078  | 4.334025  |
| C | 0.000000  | 9.346141   | 4.919147  |
| C | -0.735617 | 6.889548   | 6.152706  |
| C | 0.735617  | 6.889548   | 6.152706  |
| C | -0.735722 | 11.791461  | -1.871717 |
| C | 0.735722  | 11.791461  | -1.871717 |
| B | 0.000000  | 3.734085   | -5.550780 |
| B | 0.000000  | 0.000000   | 0.662584  |
| B | 0.000000  | -3.734085  | -5.550780 |
| C | 0.000000  | 0.000000   | 3.223235  |
| C | 0.000000  | 6.033294   | -6.646311 |
| H | 0.000000  | 6.159582   | -7.731309 |
| C | 0.000000  | -6.033294  | -6.646311 |
| H | 0.000000  | -6.159582  | -7.731309 |
| B | 0.000000  | 0.000000   | -3.566409 |
| C | 0.000000  | -1.319118  | -4.311292 |
| C | 0.000000  | -2.399484  | -4.887335 |
| C | 0.000000  | 0.000000   | -2.049454 |
| C | 0.000000  | 0.000000   | -0.824968 |
| C | 0.000000  | 1.319118   | -4.311292 |
| C | 0.000000  | 2.399484   | -4.887335 |
| C | 0.000000  | -7.280300  | -5.917278 |
| C | 0.000000  | -8.325414  | -5.295347 |
| C | 0.000000  | -9.488397  | -4.584397 |
| C | 0.000000  | -10.518348 | -3.937649 |
| C | -0.736303 | -4.861356  | -6.111470 |
| C | 0.736303  | -4.861356  | -6.111470 |
| C | -0.736303 | 4.861356   | -6.111470 |
| C | 0.736303  | 4.861356   | -6.111470 |
| C | -0.735850 | 0.000000   | 1.923666  |
| C | 0.735850  | 0.000000   | 1.923666  |
| B | 0.000000  | -11.802040 | -0.611989 |
| B | 0.000000  | -8.015479  | 5.587055  |
| C | 0.000000  | -11.735122 | -3.158908 |
| H | 0.000000  | -12.643708 | -3.765111 |
| C | 0.000000  | -5.719756  | 6.692116  |
| H | 0.000000  | -5.595907  | 7.777414  |
| B | 0.000000  | -11.745131 | 3.609189  |

|   |           |            |           |
|---|-----------|------------|-----------|
| C | 0.000000  | -10.423078 | 4.334025  |
| C | 0.000000  | -9.346141  | 4.919147  |
| C | 0.000000  | -11.786707 | 2.102330  |
| C | 0.000000  | -11.815725 | 0.877023  |
| C | 0.000000  | -4.469784  | 5.967671  |
| C | 0.000000  | -3.421308  | 5.351563  |
| C | 0.000000  | -2.254763  | 4.647229  |
| C | 0.000000  | -1.221328  | 4.006927  |
| C | -0.735617 | -6.889548  | 6.152706  |
| C | 0.735617  | -6.889548  | 6.152706  |
| C | -0.735722 | -11.791461 | -1.871717 |
| C | 0.735722  | -11.791461 | -1.871717 |
| C | 0.000000  | 10.518348  | -3.937649 |
| C | 0.000000  | 9.488397   | -4.584397 |
| C | 0.000000  | 8.325414   | -5.295347 |
| C | 0.000000  | 7.280300   | -5.917278 |
| C | 0.000000  | 4.469784   | 5.967671  |
| C | 0.000000  | 3.421308   | 5.351563  |
| C | 0.000000  | 2.254763   | 4.647229  |
| C | 0.000000  | 1.221328   | 4.006927  |
| H | 0.000000  | 12.643708  | -3.765111 |
| H | 0.000000  | -12.763048 | 4.231436  |
| H | 0.000000  | 12.763048  | 4.231436  |

**POM-27**

E= -3171.45785401

v= 2.3232

|   |           |           |           |
|---|-----------|-----------|-----------|
| B | 0.574217  | 17.677689 | 0.000000  |
| B | -5.613243 | 13.871088 | 0.000000  |
| C | 3.121342  | 17.618828 | 0.000000  |
| H | 3.724600  | 18.529447 | 0.000000  |
| C | -6.710681 | 11.571703 | 0.000000  |
| H | -7.795563 | 11.444234 | 0.000000  |
| B | -3.646749 | 17.606741 | 0.000000  |
| C | -4.367643 | 16.282508 | 0.000000  |
| C | -4.949637 | 15.203893 | 0.000000  |
| C | -2.140022 | 17.653152 | 0.000000  |
| C | -0.914837 | 17.686485 | 0.000000  |
| C | -5.982095 | 10.324102 | 0.000000  |
| C | -5.362067 | 9.277942  | 0.000000  |
| C | -4.653090 | 8.114218  | 0.000000  |
| C | -4.009007 | 7.083136  | 0.000000  |
| C | -6.175154 | 12.743265 | 0.735602  |
| C | -6.175154 | 12.743265 | -0.735602 |
| C | 1.833975  | 17.670959 | 0.735710  |
| C | 1.833975  | 17.670959 | -0.735710 |
| B | 5.566557  | 2.159215  | 0.000000  |
| B | -0.661087 | 5.872054  | 0.000000  |
| B | 5.540117  | 9.626016  | 0.000000  |
| C | -3.221674 | 5.864205  | 0.000000  |
| C | 6.674317  | -0.134131 | 0.000000  |
| H | 7.759933  | -0.255101 | 0.000000  |
| C | 6.627946  | 11.928806 | 0.000000  |
| H | 7.712508  | 12.058774 | 0.000000  |
| B | 3.567817  | 5.885646  | 0.000000  |
| C | 4.308540  | 7.206977  | 0.000000  |
| C | 4.881074  | 8.289212  | 0.000000  |
| C | 2.050952  | 5.880464  | 0.000000  |
| C | 0.826474  | 5.876539  | 0.000000  |
| C | 4.317196  | 4.568822  | 0.000000  |
| C | 4.897199  | 3.490612  | 0.000000  |
| C | 5.894658  | 13.173321 | 0.000000  |
| C | 5.269048  | 14.216235 | 0.000000  |
| C | 4.554016  | 15.376711 | 0.000000  |
| C | 3.904059  | 16.404640 | 0.000000  |
| C | 6.097147  | 10.755065 | 0.736319  |
| C | 6.097147  | 10.755065 | -0.736319 |
| C | 6.132477  | 1.034263  | 0.736203  |
| C | 6.132477  | 1.034263  | -0.736203 |

|   |           |            |           |
|---|-----------|------------|-----------|
| C | -1.922126 | 5.867931   | 0.735859  |
| C | -1.922126 | 5.867931   | -0.735859 |
| B | -5.566557 | -2.159215  | 0.000000  |
| B | 0.661087  | -5.872054  | 0.000000  |
| B | -5.540117 | -9.626016  | 0.000000  |
| C | 3.221674  | -5.864205  | 0.000000  |
| C | -6.674317 | 0.134131   | 0.000000  |
| H | -7.759933 | 0.255101   | 0.000000  |
| C | -6.627946 | -11.928806 | 0.000000  |
| H | -7.712508 | -12.058774 | 0.000000  |
| B | -3.567817 | -5.885646  | 0.000000  |
| C | -4.308540 | -7.206977  | 0.000000  |
| C | -4.881074 | -8.289212  | 0.000000  |
| C | -2.050952 | -5.880464  | 0.000000  |
| C | -0.826474 | -5.876539  | 0.000000  |
| C | -4.317196 | -4.568822  | 0.000000  |
| C | -4.897199 | -3.490612  | 0.000000  |
| C | -5.894658 | -13.173321 | 0.000000  |
| C | -5.269048 | -14.216235 | 0.000000  |
| C | -4.554016 | -15.376711 | 0.000000  |
| C | -3.904059 | -16.404640 | 0.000000  |
| C | -6.097147 | -10.755065 | 0.736319  |
| C | -6.097147 | -10.755065 | -0.736319 |
| C | -6.132477 | -1.034263  | 0.736203  |
| C | -6.132477 | -1.034263  | -0.736203 |
| C | 1.922126  | -5.867931  | 0.735859  |
| C | 1.922126  | -5.867931  | -0.735859 |
| B | -0.574217 | -17.677689 | 0.000000  |
| B | 5.613243  | -13.871088 | 0.000000  |
| C | -3.121342 | -17.618828 | 0.000000  |
| H | -3.724600 | -18.529447 | 0.000000  |
| C | 6.710681  | -11.571703 | 0.000000  |
| H | 7.795563  | -11.444234 | 0.000000  |
| B | 3.646749  | -17.606741 | 0.000000  |
| C | 4.367643  | -16.282508 | 0.000000  |
| C | 4.949637  | -15.203893 | 0.000000  |
| C | 2.140022  | -17.653152 | 0.000000  |
| C | 0.914837  | -17.686485 | 0.000000  |
| C | 5.982095  | -10.324102 | 0.000000  |
| C | 5.362067  | -9.277942  | 0.000000  |
| C | 4.653090  | -8.114218  | 0.000000  |
| C | 4.009007  | -7.083136  | 0.000000  |
| C | 6.175154  | -12.743265 | 0.735602  |
| C | 6.175154  | -12.743265 | -0.735602 |
| C | -1.833975 | -17.670959 | 0.735710  |
| C | -1.833975 | -17.670959 | -0.735710 |
| C | -4.001660 | 4.640500   | 0.000000  |
| C | -4.638773 | 3.605109   | 0.000000  |
| C | -5.339333 | 2.436305   | 0.000000  |
| C | -5.952189 | 1.385948   | 0.000000  |
| C | 5.952189  | -1.385948  | 0.000000  |
| C | 5.339333  | -2.436305  | 0.000000  |
| C | 4.638773  | -3.605109  | 0.000000  |
| C | 4.001660  | -4.640500  | 0.000000  |
| H | 4.271081  | -18.623008 | 0.000000  |
| H | -4.271081 | 18.623008  | 0.000000  |

**POM-28**

E= -4147.78710482

v= 1.4493

|   |          |           |           |
|---|----------|-----------|-----------|
| B | 0.000000 | 3.732571  | -5.582850 |
| B | 0.000000 | 0.000000  | 0.633095  |
| B | 0.000000 | -3.732571 | -5.582850 |
| C | 0.000000 | 0.000000  | 3.193638  |
| C | 0.000000 | 6.029394  | -6.683248 |
| H | 0.000000 | 6.153623  | -7.768494 |
| C | 0.000000 | -6.029394 | -6.683248 |
| H | 0.000000 | -6.153623 | -7.768494 |
| B | 0.000000 | 0.000000  | -3.595748 |
| C | 0.000000 | -1.319049 | -4.340950 |



|   |           |            |           |
|---|-----------|------------|-----------|
| C | 0.000000  | -2.399044  | -4.917633 |
| C | 0.000000  | 0.000000   | -2.078967 |
| C | 0.000000  | 0.000000   | -0.854488 |
| C | 0.000000  | 1.319049   | -4.340950 |
| C | 0.000000  | 2.399044   | -4.917633 |
| C | 0.000000  | -7.278795  | -5.958091 |
| C | 0.000000  | -8.327242  | -5.341978 |
| C | 0.000000  | -9.493897  | -4.637849 |
| C | 0.000000  | -10.527532 | -3.997895 |
| C | -0.736215 | -4.859288  | -6.145105 |
| C | 0.736215  | -4.859288  | -6.145105 |
| C | -0.736215 | 4.859288   | -6.145105 |
| C | 0.736215  | 4.859288   | -6.145105 |
| C | -0.735869 | 0.000000   | 1.894100  |
| C | 0.735869  | 0.000000   | 1.894100  |
| B | 0.000000  | -15.482811 | 5.559870  |
| B | 0.000000  | -11.748876 | -0.653699 |
| B | 0.000000  | -8.016186  | 5.562077  |
| C | 0.000000  | -11.748938 | -3.214300 |
| C | 0.000000  | -17.781910 | 6.655476  |
| H | 0.000000  | -17.908025 | 7.740491  |
| C | 0.000000  | -5.719414  | 6.662732  |
| H | 0.000000  | -5.595146  | 7.747974  |
| B | 0.000000  | -11.748986 | 3.575223  |
| C | 0.000000  | -10.429713 | 4.320334  |
| C | 0.000000  | -9.349660  | 4.896898  |
| C | 0.000000  | -11.748706 | 2.058352  |
| C | 0.000000  | -11.748674 | 0.833869  |
| C | 0.000000  | -13.067909 | 4.320183  |
| C | 0.000000  | -14.148240 | 4.896302  |
| C | 0.000000  | -4.469916  | 5.937635  |
| C | 0.000000  | -3.421428  | 5.321594  |
| C | 0.000000  | -2.254854  | 4.617329  |
| C | 0.000000  | -1.221290  | 3.977261  |
| C | -0.736191 | -6.889427  | 6.124441  |
| C | 0.736191  | -6.889427  | 6.124441  |
| C | -0.736323 | -16.610064 | 6.120503  |
| C | 0.736323  | -16.610064 | 6.120503  |
| C | -0.735858 | -11.748755 | -1.914744 |
| C | 0.735858  | -11.748755 | -1.914744 |
| B | 0.000000  | -19.764317 | -5.578131 |
| B | 0.000000  | -23.550667 | 0.621164  |
| C | 0.000000  | -23.483711 | 3.168082  |
| C | 0.000000  | -17.468610 | -6.683259 |
| H | 0.000000  | -17.344844 | -7.768566 |
| B | 0.000000  | -23.493815 | -3.600000 |
| C | 0.000000  | -23.535341 | -2.093152 |
| C | 0.000000  | -23.564373 | -0.867848 |
| C | 0.000000  | -22.171816 | -4.324956 |
| C | 0.000000  | -21.094942 | -4.910186 |
| C | -0.735604 | -18.638311 | -6.143686 |
| C | 0.735604  | -18.638311 | -6.143686 |
| C | -0.735717 | -23.539891 | 1.880892  |
| C | 0.735717  | -23.539891 | 1.880892  |
| C | 0.000000  | -12.970162 | -3.998041 |
| C | 0.000000  | -14.003598 | -4.638341 |
| C | 0.000000  | -15.170075 | -5.342777 |
| C | 0.000000  | -16.218520 | -5.958932 |
| C | 0.000000  | -19.029013 | 5.926609  |
| C | 0.000000  | -20.074169 | 5.304751  |
| C | 0.000000  | -21.237124 | 4.593761  |
| C | 0.000000  | -22.267055 | 3.946984  |
| B | 0.000000  | 8.016186   | 5.562077  |
| B | 0.000000  | 15.482811  | 5.559870  |
| B | 0.000000  | 11.748876  | -0.653699 |
| C | 0.000000  | 17.781910  | 6.655476  |
| H | 0.000000  | 17.908025  | 7.740491  |
| C | 0.000000  | 5.719414   | 6.662732  |
| H | 0.000000  | 5.595146   | 7.747974  |

|   |           |            |           |
|---|-----------|------------|-----------|
| C | 0.000000  | 11.748938  | -3.214300 |
| B | 0.000000  | 11.748986  | 3.575223  |
| C | 0.000000  | 11.748706  | 2.058352  |
| C | 0.000000  | 11.748674  | 0.833869  |
| C | 0.000000  | 13.067909  | 4.320183  |
| C | 0.000000  | 14.148240  | 4.896302  |
| C | 0.000000  | 10.429713  | 4.320334  |
| C | 0.000000  | 9.349660   | 4.896898  |
| C | 0.000000  | 12.970162  | -3.998041 |
| C | 0.000000  | 14.003598  | -4.638341 |
| C | 0.000000  | 15.170075  | -5.342777 |
| C | 0.000000  | 16.218520  | -5.958932 |
| C | 0.735858  | 11.748755  | -1.914744 |
| C | -0.735858 | 11.748755  | -1.914744 |
| C | 0.736191  | 6.889427   | 6.124441  |
| C | -0.736191 | 6.889427   | 6.124441  |
| C | 0.736323  | 16.610064  | 6.120503  |
| C | -0.736323 | 16.610064  | 6.120503  |
| B | 0.000000  | 19.764317  | -5.578131 |
| B | 0.000000  | 23.550667  | 0.621164  |
| C | 0.000000  | 17.468610  | -6.683259 |
| H | 0.000000  | 17.344844  | -7.768566 |
| C | 0.000000  | 23.483711  | 3.168082  |
| H | 0.000000  | 24.392527  | 3.774083  |
| B | 0.000000  | 23.493815  | -3.600000 |
| C | 0.000000  | 23.535341  | -2.093152 |
| C | 0.000000  | 23.564373  | -0.867848 |
| C | 0.000000  | 22.171816  | -4.324956 |
| C | 0.000000  | 21.094942  | -4.910186 |
| C | 0.000000  | 22.267055  | 3.946984  |
| C | 0.000000  | 21.237124  | 4.593761  |
| C | 0.000000  | 20.074169  | 5.304751  |
| C | 0.000000  | 19.029013  | 5.926609  |
| C | 0.735717  | 23.539891  | 1.880892  |
| C | -0.735717 | 23.539891  | 1.880892  |
| C | 0.735604  | 18.638311  | -6.143686 |
| C | -0.735604 | 18.638311  | -6.143686 |
| C | 0.000000  | 1.221290   | 3.977261  |
| C | 0.000000  | 2.254854   | 4.617329  |
| C | 0.000000  | 3.421428   | 5.321594  |
| C | 0.000000  | 4.469916   | 5.937635  |
| C | 0.000000  | 7.278795   | -5.958091 |
| C | 0.000000  | 8.327242   | -5.341978 |
| C | 0.000000  | 9.493897   | -4.637849 |
| C | 0.000000  | 10.527532  | -3.997895 |
| H | 0.000000  | -24.392527 | 3.774083  |
| H | 0.000000  | -24.511694 | -4.222172 |
| H | 0.000000  | 24.511694  | -4.222172 |

**POM-29**

E= -5124.11635456  
v= 0.9359

|   |           |           |          |
|---|-----------|-----------|----------|
| B | -5.582379 | 9.601006  | 0.000000 |
| B | 0.637276  | 5.875025  | 0.000000 |
| B | -5.574839 | 2.135807  | 0.000000 |
| C | 3.197821  | 5.877831  | 0.000000 |
| C | -6.684930 | 11.896777 | 0.000000 |
| H | -7.770278 | 12.020113 | 0.000000 |
| C | -6.673001 | -0.162081 | 0.000000 |
| H | -7.758102 | -0.287541 | 0.000000 |
| B | -3.591561 | 5.870423  | 0.000000 |
| C | -4.335415 | 4.550592  | 0.000000 |
| C | -4.910985 | 3.470005  | 0.000000 |
| C | -2.074786 | 5.872031  | 0.000000 |
| C | -0.850306 | 5.873368  | 0.000000 |
| C | -4.338158 | 7.188661  | 0.000000 |
| C | -4.915912 | 8.268085  | 0.000000 |
| C | -5.946447 | -1.410713 | 0.000000 |
| C | -5.329130 | -2.458448 | 0.000000 |

|   |           |            |           |   |           |            |           |
|---|-----------|------------|-----------|---|-----------|------------|-----------|
| C | -4.623754 | -3.624347  | 0.000000  | C | 5.970774  | -22.086235 | 0.000000  |
| C | -3.982639 | -4.657260  | 0.000000  | C | 5.353413  | -21.038498 | 0.000000  |
| C | -6.136041 | 1.008550   | 0.736211  | C | 4.647903  | -19.872671 | 0.000000  |
| C | -6.136041 | 1.008550   | -0.736211 | C | 4.006515  | -18.839910 | 0.000000  |
| C | -6.145798 | 10.727122  | 0.736218  | C | 6.158183  | -24.505803 | 0.735600  |
| C | -6.145798 | 10.727122  | -0.736218 | C | 6.158183  | -24.505803 | -0.735600 |
| C | 1.898280  | 5.876388   | 0.735870  | C | -1.860786 | -29.416107 | 0.735711  |
| C | 1.898280  | 5.876388   | -0.735870 | C | -1.860786 | -29.416107 | -0.735711 |
| B | 5.582379  | -9.601006  | 0.000000  | C | -3.980112 | -7.099944  | 0.000000  |
| B | -0.637276 | -5.875025  | 0.000000  | C | -4.619163 | -8.134137  | 0.000000  |
| B | 5.574839  | -2.135807  | 0.000000  | C | -5.322072 | -9.301526  | 0.000000  |
| C | -3.197821 | -5.877831  | 0.000000  | C | -5.937220 | -10.350537 | 0.000000  |
| C | 6.684930  | -11.896777 | 0.000000  | C | 5.960859  | -13.146751 | 0.000000  |
| H | 7.770278  | -12.020113 | 0.000000  | C | 5.345631  | -14.195717 | 0.000000  |
| C | 6.673001  | 0.162081   | 0.000000  | C | 4.642655  | -15.363069 | 0.000000  |
| H | 7.758102  | 0.287541   | 0.000000  | C | 4.003628  | -16.397275 | 0.000000  |
| B | 3.591561  | -5.870423  | 0.000000  | B | 5.558625  | 13.896415  | 0.000000  |
| C | 4.335415  | -4.550592  | 0.000000  | B | 5.548623  | 21.363271  | 0.000000  |
| C | 4.910985  | -3.470005  | 0.000000  | B | -0.660807 | 17.622405  | 0.000000  |
| C | 2.074786  | -5.872031  | 0.000000  | C | 6.641636  | 23.663599  | 0.000000  |
| C | 0.850306  | -5.873368  | 0.000000  | H | 7.726502  | 23.790981  | 0.000000  |
| C | 4.338158  | -7.188661  | 0.000000  | C | 6.661315  | 11.600621  | 0.000000  |
| C | 4.915912  | -8.268085  | 0.000000  | H | 7.746657  | 11.477228  | 0.000000  |
| C | 5.946447  | 1.410713   | 0.000000  | C | -3.221406 | 17.619565  | 0.000000  |
| C | 5.329130  | 2.458448   | 0.000000  | B | 3.568115  | 17.627256  | 0.000000  |
| C | 4.623754  | 3.624347   | 0.000000  | C | 2.051243  | 17.625302  | 0.000000  |
| C | 3.982639  | 4.657260   | 0.000000  | C | 0.826760  | 17.623894  | 0.000000  |
| C | 6.136041  | -1.008550  | 0.736211  | C | 4.311673  | 18.946961  | 0.000000  |
| C | 6.136041  | -1.008550  | -0.736211 | C | 4.886580  | 20.027938  | 0.000000  |
| C | 6.145798  | -10.727122 | 0.736218  | C | 4.314640  | 16.308779  | 0.000000  |
| C | 6.145798  | -10.727122 | -0.736218 | C | 4.892247  | 15.229285  | 0.000000  |
| C | -1.898280 | -5.876388  | 0.735870  | C | -4.006515 | 18.839910  | 0.000000  |
| C | -1.898280 | -5.876388  | -0.735870 | C | -4.647903 | 19.872671  | 0.000000  |
| B | -5.558625 | -13.896415 | 0.000000  | C | -5.353413 | 21.038498  | 0.000000  |
| B | 0.660807  | -17.622405 | 0.000000  | C | -5.970774 | 22.086235  | 0.000000  |
| B | -5.548623 | -21.363271 | 0.000000  | C | -1.921852 | 17.620843  | -0.735858 |
| C | 3.221406  | -17.619565 | 0.000000  | C | -1.921852 | 17.620843  | 0.735858  |
| C | -6.661315 | -11.600621 | 0.000000  | C | 6.122069  | 12.770191  | -0.736190 |
| H | -7.746657 | -11.477228 | 0.000000  | C | 6.122069  | 12.770191  | 0.736190  |
| C | -6.641636 | -23.663599 | 0.000000  | C | 6.108034  | 22.491127  | -0.736322 |
| H | -7.726502 | -23.790981 | 0.000000  | C | 6.108034  | 22.491127  | 0.736322  |
| B | -3.568115 | -17.627256 | 0.000000  | B | -5.594084 | 25.632544  | 0.000000  |
| C | -4.311673 | -18.946961 | 0.000000  | B | 0.601047  | 29.425804  | 0.000000  |
| C | -4.886580 | -20.027938 | 0.000000  | C | -6.696486 | 23.335518  | 0.000000  |
| C | -2.051243 | -17.625302 | 0.000000  | H | -7.781655 | 23.210554  | 0.000000  |
| C | -0.826760 | -17.623894 | 0.000000  | C | 3.148053  | 29.361595  | 0.000000  |
| C | -4.314640 | -16.308779 | 0.000000  | H | 3.753042  | 30.271061  | 0.000000  |
| C | -4.892247 | -15.229285 | 0.000000  | B | -3.620076 | 29.364251  | 0.000000  |
| C | -5.911306 | -24.909845 | 0.000000  | C | -2.113247 | 29.407430  | 0.000000  |
| C | -5.288231 | -25.954276 | 0.000000  | C | -0.887984 | 29.437848  | 0.000000  |
| C | -4.576180 | -27.116581 | 0.000000  | C | -4.343652 | 28.041461  | 0.000000  |
| C | -3.928488 | -28.145938 | 0.000000  | C | -4.927688 | 26.963948  | 0.000000  |
| C | -6.108034 | -22.491127 | 0.736322  | C | 3.928488  | 28.145938  | 0.000000  |
| C | -6.108034 | -22.491127 | -0.736322 | C | 4.576180  | 27.116581  | 0.000000  |
| C | -6.122069 | -12.770191 | 0.736190  | C | 5.288231  | 25.954276  | 0.000000  |
| C | -6.122069 | -12.770191 | -0.736190 | C | 5.911306  | 24.909845  | 0.000000  |
| C | 1.921852  | -17.620843 | 0.735858  | C | 1.860786  | 29.416107  | -0.735711 |
| C | 1.921852  | -17.620843 | -0.735858 | C | 1.860786  | 29.416107  | 0.735711  |
| B | -0.601047 | -29.425804 | 0.000000  | C | -6.158183 | 24.505803  | -0.735600 |
| B | 5.594084  | -25.632544 | 0.000000  | C | -6.158183 | 24.505803  | 0.735600  |
| C | -3.148053 | -29.361595 | 0.000000  | C | 3.980112  | 7.099944   | 0.000000  |
| H | -3.753042 | -30.271061 | 0.000000  | C | 4.619163  | 8.134137   | 0.000000  |
| C | 6.696486  | -23.335518 | 0.000000  | C | 5.322072  | 9.301526   | 0.000000  |
| H | 7.781655  | -23.210554 | 0.000000  | C | 5.937220  | 10.350537  | 0.000000  |
| B | 3.620076  | -29.364251 | 0.000000  | C | -5.960859 | 13.146751  | 0.000000  |
| C | 4.343652  | -28.041461 | 0.000000  | C | -5.345631 | 14.195717  | 0.000000  |
| C | 4.927688  | -26.963948 | 0.000000  | C | -4.642655 | 15.363069  | 0.000000  |
| C | 2.113247  | -29.407430 | 0.000000  | C | -4.003628 | 16.397275  | 0.000000  |
| C | 0.887984  | -29.437848 | 0.000000  | H | 4.243320  | -30.381409 | 0.000000  |

H -4.243320 30.381409 0.000000

**POM-30**

E= -2955.61573784  
 v= 4.6916

B -3.655651 -11.419468 0.000000  
 B 3.655651 -11.419468 0.000000  
 C 5.823758 -10.080567 0.000000  
 C -5.823758 -10.080567 0.000000  
 H -6.804714 -10.561175 0.000000  
 B 0.000000 -13.531501 0.000000  
 C 1.310410 -12.785938 0.000000  
 C 2.378307 -12.184405 0.000000  
 C -1.310410 -12.785938 0.000000  
 C -2.378307 -12.184405 0.000000  
 C -4.738794 -10.775523 0.735573  
 C -4.738794 -10.775523 -0.735573  
 C 4.738794 -10.775523 0.735573  
 C 4.738794 -10.775523 -0.735573  
 B 3.660784 -2.113555 0.000000  
 B -3.660784 -2.113555 0.000000  
 B 0.000000 4.227110 0.000000  
 C -5.878128 -3.393739 0.000000  
 C 5.878128 -3.393739 0.000000  
 C 0.000000 6.787477 0.000000  
 B 0.000000 0.000000 0.000000  
 C 0.000000 1.515066 0.000000  
 C 0.000000 2.739428 0.000000  
 C -1.312085 -0.757533 0.000000  
 C -2.372414 -1.369714 0.000000  
 C 1.312085 -0.757533 0.000000  
 C 2.372414 -1.369714 0.000000  
 C -1.225326 7.564596 0.000000  
 C -2.276351 8.175597 0.000000  
 C -3.465457 8.841103 0.000000  
 C -4.537033 9.416102 0.000000  
 C 0.000000 5.487524 0.736063  
 C 0.000000 5.487524 -0.736063  
 C 4.752335 -2.743762 0.736063  
 C 4.752335 -2.743762 -0.736063  
 C -4.752335 -2.743762 0.736063  
 C -4.752335 -2.743762 -0.736063  
 B -8.061724 8.875621 0.000000  
 B -11.717375 2.543847 0.000000  
 C -5.818148 10.083806 0.000000  
 H -5.743889 11.173643 0.000000  
 C -11.641906 -0.003239 0.000000  
 H -12.548603 -0.612468 0.000000  
 B -11.718624 6.765751 0.000000  
 C -11.728152 5.258120 0.000000  
 C -11.741158 4.032528 0.000000  
 C -10.417742 7.527818 0.000000  
 C -9.362851 8.151877 0.000000  
 C -10.423100 -0.778865 0.000000  
 C -9.389348 -1.419378 0.000000  
 C -8.218451 -2.116421 0.000000  
 C -7.163795 -2.721135 0.000000  
 C -11.701274 1.283845 0.735573  
 C -11.701274 1.283845 -0.735573  
 C -6.962479 9.491678 0.735573  
 C -6.962479 9.491678 -0.735573  
 B 8.061724 8.875621 0.000000  
 B 11.717375 2.543847 0.000000  
 C 5.818148 10.083806 0.000000  
 H 5.743889 11.173643 0.000000  
 C 11.641906 -0.003239 0.000000  
 B 11.718624 6.765751 0.000000  
 C 11.728152 5.258120 0.000000  
 C 11.741158 4.032528 0.000000  
 C 10.417742 7.527818 0.000000

C 9.362851 8.151877 0.000000  
 C 11.701274 1.283845 0.735573  
 C 11.701274 1.283845 -0.735573  
 C 6.962479 9.491678 0.735573  
 C 6.962479 9.491678 -0.735573  
 C 5.886067 -8.637237 0.000000  
 C 5.923892 -7.421725 0.000000  
 C 5.942099 -6.059177 0.000000  
 C 5.938469 -4.843461 0.000000  
 C -5.938469 -4.843461 0.000000  
 C -5.942099 -6.059177 0.000000  
 C -5.923892 -7.421725 0.000000  
 C -5.886067 -8.637237 0.000000  
 C 10.423100 -0.778865 0.000000  
 C 9.389348 -1.419378 0.000000  
 C 8.218451 -2.116421 0.000000  
 C 7.163795 -2.721135 0.000000  
 C 4.537033 9.416102 0.000000  
 C 3.465457 8.841103 0.000000  
 C 2.276351 8.175597 0.000000  
 C 1.225326 7.564596 0.000000  
 H 6.804714 -10.561175 0.000000  
 H 12.548603 -0.612468 0.000000  
 H -12.751662 7.362175 0.000000  
 H 0.000000 -14.724351 0.000000  
 H 12.751662 7.362175 0.000000

**POM-31**

E= -1675.7565046  
 v= 5.5894

B 5.839340 6.022000 0.000000  
 B -5.839340 6.022000 0.000000  
 C 7.973362 4.629520 0.000000  
 H 8.964807 5.088557 0.000000  
 C -7.973362 4.629520 0.000000  
 H -8.964807 5.088557 0.000000  
 C -3.536553 7.452930 0.000000  
 C -4.586178 6.820483 0.000000  
 C 3.536553 7.452930 0.000000  
 C 4.586178 6.820483 0.000000  
 C -8.005120 3.186336 0.000000  
 C -8.027732 1.968005 0.000000  
 C -8.042763 0.612672 0.000000  
 C -6.905563 5.350249 0.736437  
 C -6.905563 5.350249 -0.736437  
 C 6.905563 5.350249 0.736437  
 C 6.905563 5.350249 -0.736437  
 B -5.839340 -6.022000 0.000000  
 B 5.839340 -6.022000 0.000000  
 C -7.973362 -4.629520 0.000000  
 H -8.964807 -5.088557 0.000000  
 C 7.973362 -4.629520 0.000000  
 H 8.964807 -5.088557 0.000000  
 C 3.536553 -7.452930 0.000000  
 C 4.586178 -6.820483 0.000000  
 C -3.536553 -7.452930 0.000000  
 C -4.586178 -6.820483 0.000000  
 C 8.042763 -0.612672 0.000000  
 C 8.042763 0.612672 0.000000  
 C 8.027732 1.968005 0.000000  
 C 8.005120 3.186336 0.000000  
 C 6.905563 -5.350249 0.736437  
 C 6.905563 -5.350249 -0.736437  
 C -6.905563 -5.350249 0.736437  
 C -6.905563 -5.350249 -0.736437  
 B 0.000000 -9.499636 0.000000  
 B 0.000000 9.499636 0.000000  
 C 1.304581 8.752630 0.000000  
 C 2.370913 8.141351 0.000000

|   |           |            |          |
|---|-----------|------------|----------|
| C | -1.304581 | 8.752630   | 0.000000 |
| C | -2.370913 | 8.141351   | 0.000000 |
| C | 1.304581  | -8.752630  | 0.000000 |
| C | 2.370913  | -8.141351  | 0.000000 |
| C | -1.304581 | -8.752630  | 0.000000 |
| C | -2.370913 | -8.141351  | 0.000000 |
| C | -8.042763 | -0.612672  | 0.000000 |
| C | 8.027732  | -1.968005  | 0.000000 |
| C | 8.005120  | -3.186336  | 0.000000 |
| C | -8.027732 | -1.968005  | 0.000000 |
| C | -8.005120 | -3.186336  | 0.000000 |
| H | 0.000000  | 10.693405  | 0.000000 |
| H | 0.000000  | -10.693405 | 0.000000 |

**POM-32**

E= -3032.88295959

v= 2.5522

|   |           |            |            |
|---|-----------|------------|------------|
| B | 0.000000  | 10.221294  | -8.139487  |
| B | 0.000000  | 16.299133  | 1.832576   |
| C | 0.000000  | 16.223092  | 4.379530   |
| C | 0.000000  | 7.922809   | -9.239582  |
| H | 0.000000  | 7.799648   | -10.325184 |
| C | 0.000000  | 16.321616  | -0.878498  |
| C | 0.000000  | 16.327970  | 0.346919   |
| C | 0.000000  | 11.554883  | -7.484502  |
| C | 0.736332  | 9.092949   | -8.701117  |
| C | -0.736332 | 9.092949   | -8.701117  |
| C | 0.736470  | 16.281796  | 3.092614   |
| C | -0.736470 | 16.281796  | 3.092614   |
| B | 0.000000  | 16.229924  | -4.963471  |
| C | 0.000000  | 16.270436  | -3.460790  |
| C | 0.000000  | 16.302910  | -2.232101  |
| C | 0.000000  | 12.641431  | -6.917845  |
| C | 0.000000  | 13.835979  | -6.280928  |
| C | 0.000000  | 14.913042  | -5.688811  |
| B | 0.000000  | 6.016500   | 8.105334   |
| B | 0.000000  | 0.000000   | -1.875755  |
| B | 0.000000  | -6.016500  | 8.105334   |
| C | 0.000000  | 0.000000   | -4.437718  |
| C | 0.000000  | 8.317366   | 9.199034   |
| H | 0.000000  | 8.442157   | 10.284438  |
| C | 0.000000  | -8.317366  | 9.199034   |
| H | 0.000000  | -8.442157  | 10.284438  |
| C | 0.000000  | -3.591943  | 6.891324   |
| C | 0.000000  | -4.680271  | 7.453707   |
| C | 0.000000  | 0.000000   | 0.833107   |
| C | 0.000000  | 0.000000   | -0.392242  |
| C | 0.000000  | 4.680271   | 7.453707   |
| C | 0.000000  | -9.565578  | 8.474097   |
| C | 0.000000  | -10.617621 | 7.859268   |
| C | 0.000000  | -11.782910 | 7.166998   |
| C | 0.736775  | -7.145715  | 8.663701   |
| C | -0.736775 | -7.145715  | 8.663701   |
| C | 0.736775  | 7.145715   | 8.663701   |
| C | -0.736775 | 7.145715   | 8.663701   |
| C | 0.736312  | 0.000000   | -3.137788  |
| C | -0.736312 | 0.000000   | -3.137788  |
| B | 0.000000  | -16.299133 | 1.832576   |
| B | 0.000000  | -10.221294 | -8.139487  |
| C | 0.000000  | -16.223092 | 4.379530   |
| C | 0.000000  | -7.922809  | -9.239582  |
| H | 0.000000  | -7.799648  | -10.325184 |
| C | 0.000000  | -12.641431 | -6.917845  |
| C | 0.000000  | -11.554883 | -7.484502  |
| C | 0.000000  | -16.321616 | -0.878498  |
| C | 0.000000  | -16.327970 | 0.346919   |
| C | 0.000000  | -4.450848  | -7.218642  |
| C | 0.000000  | -3.401550  | -6.585898  |
| C | 0.000000  | -2.249399  | -5.872968  |

|   |           |            |           |
|---|-----------|------------|-----------|
| C | 0.000000  | -1.219126  | -5.222960 |
| C | 0.736332  | -9.092949  | -8.701117 |
| C | -0.736332 | -9.092949  | -8.701117 |
| C | 0.736470  | -16.281796 | 3.092614  |
| C | -0.736470 | -16.281796 | 3.092614  |
| B | 0.000000  | -16.229924 | -4.963471 |
| B | 0.000000  | 0.000000   | 4.928170  |
| C | 0.000000  | 0.000000   | 3.415060  |
| C | 0.000000  | 0.000000   | 2.187276  |
| C | 0.000000  | -1.314275  | 5.674542  |
| C | 0.000000  | -2.393831  | 6.259371  |
| C | 0.000000  | -14.913042 | -5.688811 |
| C | 0.000000  | -13.835979 | -6.280928 |
| C | 0.000000  | -16.270436 | -3.460790 |
| C | 0.000000  | -16.302910 | -2.232101 |
| C | 0.000000  | -12.829337 | 6.529492  |
| C | 0.000000  | -5.618641  | -7.906271 |
| C | 0.000000  | -6.672668  | -8.517644 |
| C | 0.000000  | -13.979036 | 5.811632  |
| C | 0.000000  | -15.007657 | 5.158358  |
| C | 0.000000  | 3.591943   | 6.891324  |
| C | 0.000000  | 2.393831   | 6.259371  |
| C | 0.000000  | 1.314275   | 5.674542  |
| C | 0.000000  | 1.219126   | -5.222960 |
| C | 0.000000  | 2.249399   | -5.872968 |
| C | 0.000000  | 3.401550   | -6.585898 |
| C | 0.000000  | 4.450848   | -7.218642 |
| C | 0.000000  | 5.618641   | -7.906271 |
| C | 0.000000  | 6.672668   | -8.517644 |
| C | 0.000000  | 9.565578   | 8.474097  |
| C | 0.000000  | 10.617621  | 7.859268  |
| C | 0.000000  | 11.782910  | 7.166998  |
| C | 0.000000  | 12.829337  | 6.529492  |
| C | 0.000000  | 13.979036  | 5.811632  |
| C | 0.000000  | 15.007657  | 5.158358  |
| H | 0.000000  | 17.249295  | -5.584693 |
| H | 0.000000  | 17.131484  | 4.986544  |
| H | 0.000000  | -17.249295 | -5.584693 |
| H | 0.000000  | -17.131484 | 4.986544  |

**POM-33**

E= -4390.00938548

v= 1.1191

|   |            |            |           |
|---|------------|------------|-----------|
| B | -8.163181  | -18.320192 | 0.000000  |
| B | 1.795703   | -24.421232 | 0.000000  |
| C | 4.342843   | -24.351072 | 0.000000  |
| C | -9.258430  | -16.019391 | 0.000000  |
| H | -10.343766 | -15.893924 | 0.000000  |
| C | -0.915420  | -24.437181 | 0.000000  |
| C | 0.309979   | -24.446450 | 0.000000  |
| C | -7.510890  | -19.655092 | 0.000000  |
| C | -8.722402  | -17.190637 | 0.736342  |
| C | -8.722402  | -17.190637 | -0.736342 |
| C | 3.055783   | -24.406691 | 0.736439  |
| C | 3.055783   | -24.406691 | -0.736439 |
| B | -5.000156  | -24.335693 | 0.000000  |
| C | -3.497583  | -24.379805 | 0.000000  |
| C | -2.268976  | -24.415250 | 0.000000  |
| C | -6.946392  | -20.742763 | 0.000000  |
| C | -6.312171  | -21.938750 | 0.000000  |
| C | -5.722475  | -23.017138 | 0.000000  |
| B | 8.092968   | -14.153619 | 0.000000  |
| B | -1.875650  | -8.114451  | 0.000000  |
| B | 8.120464   | -2.122193  | 0.000000  |
| C | -4.437593  | -8.108126  | 0.000000  |
| C | 9.181338   | -16.456972 | 0.000000  |
| H | 10.266450  | -16.584281 | 0.000000  |
| C | 9.222212   | 0.174904   | 0.000000  |
| H | 10.308011  | 0.296280   | 0.000000  |

|   |            |            |           |
|---|------------|------------|-----------|
| C | 6.899578   | -4.543067  | 0.000000  |
| C | 7.464789   | -3.456211  | 0.000000  |
| C | 0.833211   | -8.121055  | 0.000000  |
| C | -0.392131  | -8.118069  | 0.000000  |
| C | 7.444237   | -12.815975 | 0.000000  |
| C | 8.502225   | 1.426117   | 0.000000  |
| C | 7.893101   | 2.481432   | 0.000000  |
| C | 7.207728   | 3.650547   | 0.000000  |
| C | 8.682307   | -0.994418  | 0.736682  |
| C | 8.682307   | -0.994418  | -0.736682 |
| C | 8.648768   | -15.284098 | 0.736793  |
| C | 8.648768   | -15.284098 | -0.736793 |
| C | -3.137666  | -8.111299  | 0.736290  |
| C | -3.137666  | -8.111299  | -0.736290 |
| B | -8.092968  | 14.153619  | 0.000000  |
| B | 1.875650   | 8.114451   | 0.000000  |
| B | -8.120464  | 2.122193   | 0.000000  |
| C | 4.437593   | 8.108126   | 0.000000  |
| C | -9.181338  | 16.456972  | 0.000000  |
| H | -10.266450 | 16.584281  | 0.000000  |
| C | -9.222212  | -0.174904  | 0.000000  |
| H | -10.308011 | -0.296280  | 0.000000  |
| C | -6.899578  | 4.543067   | 0.000000  |
| C | -7.464789  | 3.456211   | 0.000000  |
| C | -0.833211  | 8.121055   | 0.000000  |
| C | 0.392131   | 8.118069   | 0.000000  |
| C | -7.444237  | 12.815975  | 0.000000  |
| C | -7.207728  | -3.650547  | 0.000000  |
| C | -6.577319  | -4.701270  | 0.000000  |
| C | -5.867106  | -5.855093  | 0.000000  |
| C | -5.219733  | -6.887017  | 0.000000  |
| C | -8.682307  | 0.994418   | 0.736682  |
| C | -8.682307  | 0.994418   | -0.736682 |
| C | -8.648768  | 15.284098  | 0.736793  |
| C | -8.648768  | 15.284098  | -0.736793 |
| C | 3.137666   | 8.111299   | 0.736290  |
| C | 3.137666   | 8.111299   | -0.736290 |
| B | -4.928206  | 8.130670   | 0.000000  |
| B | 4.928206   | -8.130670  | 0.000000  |
| C | 3.415150   | -8.127240  | 0.000000  |
| C | 2.187368   | -8.124333  | 0.000000  |
| C | 5.677414   | -6.817827  | 0.000000  |
| C | 6.264643   | -5.739608  | 0.000000  |
| C | -5.677414  | 6.817827   | 0.000000  |
| C | -6.264643  | 5.739608   | 0.000000  |
| C | -3.415150  | 8.127240   | 0.000000  |
| C | -2.187368  | 8.124333   | 0.000000  |
| C | 6.577319   | 4.701270   | 0.000000  |
| C | -7.893101  | -2.481432  | 0.000000  |
| C | -8.502225  | -1.426117  | 0.000000  |
| C | 5.867106   | 5.855093   | 0.000000  |
| C | 5.219733   | 6.887017   | 0.000000  |
| C | -6.884168  | 11.726449  | 0.000000  |
| C | -6.254552  | 10.527118  | 0.000000  |
| C | -5.671868  | 9.446395   | 0.000000  |
| C | 6.884168   | -11.726449 | 0.000000  |
| C | 6.254552   | -10.527118 | 0.000000  |
| C | 5.671868   | -9.446395  | 0.000000  |
| B | 8.163181   | 18.320192  | 0.000000  |
| B | -1.795703  | 24.421232  | 0.000000  |
| C | -4.342843  | 24.351072  | 0.000000  |
| C | 9.258430   | 16.019391  | 0.000000  |
| H | 10.343766  | 15.893924  | 0.000000  |
| C | 0.915420   | 24.437181  | 0.000000  |
| C | -0.309979  | 24.446450  | 0.000000  |
| C | 7.510890   | 19.655092  | 0.000000  |
| C | 8.722402   | 17.190637  | 0.736342  |
| C | 8.722402   | 17.190637  | -0.736342 |
| C | -3.055783  | 24.406691  | 0.736439  |

|   |           |            |           |
|---|-----------|------------|-----------|
| C | -3.055783 | 24.406691  | -0.736439 |
| B | 5.000156  | 24.335693  | 0.000000  |
| C | 3.497583  | 24.379805  | 0.000000  |
| C | 2.268976  | 24.415250  | 0.000000  |
| C | 6.946392  | 20.742763  | 0.000000  |
| C | 6.312171  | 21.938750  | 0.000000  |
| C | 5.722475  | 23.017138  | 0.000000  |
| C | -5.124639 | 23.137646  | 0.000000  |
| C | -5.780479 | 22.110661  | 0.000000  |
| C | -6.501103 | 20.962689  | 0.000000  |
| C | -7.140924 | 19.917674  | 0.000000  |
| C | -7.836121 | 18.754128  | 0.000000  |
| C | -8.453403 | 17.703521  | 0.000000  |
| C | 8.533792  | 14.770723  | 0.000000  |
| C | 7.920050  | 13.718075  | 0.000000  |
| C | 7.229449  | 12.552037  | 0.000000  |
| C | 6.594046  | 11.504349  | 0.000000  |
| C | 5.878340  | 10.353920  | 0.000000  |
| C | 5.225866  | 9.325207   | 0.000000  |
| C | -5.225866 | -9.325207  | 0.000000  |
| C | -5.878340 | -10.353920 | 0.000000  |
| C | -6.594046 | -11.504349 | 0.000000  |
| C | -7.229449 | -12.552037 | 0.000000  |
| C | -7.920050 | -13.718075 | 0.000000  |
| C | -8.533792 | -14.770723 | 0.000000  |
| C | 8.453403  | -17.703521 | 0.000000  |
| C | 7.836121  | -18.754128 | 0.000000  |
| C | 7.140924  | -19.917674 | 0.000000  |
| C | 6.501103  | -20.962689 | 0.000000  |
| C | 5.780479  | -22.110661 | 0.000000  |
| C | 5.124639  | -23.137646 | 0.000000  |
| H | -4.947685 | 25.261007  | 0.000000  |
| H | 5.623760  | 25.353582  | 0.000000  |
| H | -5.623760 | -25.353582 | 0.000000  |
| H | 4.947685  | -25.261007 | 0.000000  |

**POM-34**

E= -5747.13580942

v= 0.6990

|   |           |           |            |
|---|-----------|-----------|------------|
| B | 0.000000  | 32.536504 | -1.840890  |
| B | 0.000000  | 26.457311 | 8.131334   |
| C | 0.000000  | 32.460370 | -4.387857  |
| C | 0.000000  | 24.158857 | 9.231490   |
| H | 0.000000  | 24.035735 | 10.317100  |
| C | 0.000000  | 28.877046 | 6.908928   |
| C | 0.000000  | 27.790714 | 7.475986   |
| C | 0.000000  | 32.558524 | 0.870181   |
| C | 0.000000  | 32.565067 | -0.355229  |
| C | 0.000000  | 22.908569 | 8.509701   |
| C | 0.000000  | 21.854504 | 7.898406   |
| C | 0.000000  | 20.686889 | 7.210479   |
| C | 0.736317  | 25.328926 | 8.692925   |
| C | -0.736317 | 25.328926 | 8.692925   |
| C | 0.736419  | 32.519227 | -3.100946  |
| C | -0.736419 | 32.519227 | -3.100946  |
| B | 0.000000  | 10.222206 | -8.115983  |
| B | 0.000000  | 16.236714 | 1.867056   |
| B | 0.000000  | 22.253751 | -8.114494  |
| C | 0.000000  | 16.236441 | 4.429031   |
| C | 0.000000  | 7.922566  | -9.212379  |
| H | 0.000000  | 7.798629  | -10.297894 |
| C | 0.000000  | 24.554814 | -9.207640  |
| H | 0.000000  | 24.679830 | -10.293023 |
| C | 0.000000  | 19.829234 | -6.900389  |
| C | 0.000000  | 20.917534 | -7.462808  |
| C | 0.000000  | 16.236790 | -0.841803  |
| C | 0.000000  | 16.236758 | 0.383537   |
| C | 0.000000  | 11.557676 | -7.463281  |
| C | 0.000000  | 28.020355 | -7.175586  |
| C | 0.000000  | 29.066771 | -6.538067  |

|   |           |            |            |   |           |            |           |
|---|-----------|------------|------------|---|-----------|------------|-----------|
| C | 0.000000  | 30.216253  | -5.819854  | C | 0.736261  | -16.236484 | 3.129090  |
| C | 0.000000  | 31.244846  | -5.166545  | C | -0.736261 | -16.236484 | 3.129090  |
| C | 0.736808  | 23.383091  | -8.672591  | B | 0.000000  | -16.237620 | -4.936805 |
| C | -0.736808 | 23.383091  | -8.672591  | B | 0.000000  | 0.000000   | 4.955548  |
| C | 0.736690  | 9.093113   | -8.675201  | C | 0.000000  | 0.000000   | 3.442550  |
| C | -0.736690 | 9.093113   | -8.675201  | C | 0.000000  | 0.000000   | 2.214768  |
| C | 0.736261  | 16.236484  | 3.129090   | C | 0.000000  | -1.314325  | 5.702073  |
| C | -0.736261 | 16.236484  | 3.129090   | C | 0.000000  | -2.393718  | 6.287147  |
| B | 0.000000  | 16.237620  | -4.936805  | C | 0.000000  | -14.923152 | -5.683207 |
| B | 0.000000  | 32.465861  | 4.955117   | C | 0.000000  | -13.843687 | -6.268128 |
| C | 0.000000  | 32.506721  | 3.452457   | C | 0.000000  | -16.237434 | -3.423746 |
| C | 0.000000  | 32.539503  | 2.223782   | C | 0.000000  | -16.237203 | -2.195965 |
| C | 0.000000  | 31.148853  | 5.680263   | C | 0.000000  | -12.834790 | 6.576951  |
| C | 0.000000  | 30.071727  | 6.272248   | C | 0.000000  | -5.618859  | -7.878229 |
| C | 0.000000  | 17.551781  | -5.683213  | C | 0.000000  | -6.672896  | -8.489554 |
| C | 0.000000  | 18.631284  | -6.268145  | C | 0.000000  | -13.986931 | 5.864016  |
| C | 0.000000  | 16.237434  | -3.423746  | C | 0.000000  | -15.017272 | 5.214135  |
| C | 0.000000  | 16.237203  | -2.195965  | C | 0.000000  | -19.829234 | -6.900389 |
| C | 0.000000  | 19.637698  | 6.577567   | C | 0.000000  | -18.631284 | -6.268145 |
| C | 0.000000  | 26.855038  | -7.867810  | C | 0.000000  | -17.551781 | -5.683213 |
| C | 0.000000  | 25.802947  | -8.482552  | C | 0.000000  | 3.591571   | 6.919583  |
| C | 0.000000  | 18.485599  | 5.864559   | C | 0.000000  | 2.393718   | 6.287147  |
| C | 0.000000  | 17.455398  | 5.214444   | C | 0.000000  | 1.314325   | 5.702073  |
| C | 0.000000  | 12.645805  | -6.900539  | B | 0.000000  | -26.457311 | 8.131334  |
| C | 0.000000  | 13.843687  | -6.268128  | B | 0.000000  | -32.536504 | -1.840890 |
| C | 0.000000  | 14.923152  | -5.683207  | C | 0.000000  | -32.460370 | -4.387857 |
| B | 0.000000  | 6.014867   | 8.135523   | C | 0.000000  | -24.158857 | 9.231490  |
| B | 0.000000  | 0.000000   | -1.848249  | H | 0.000000  | -24.035735 | 10.317100 |
| B | 0.000000  | -6.014867  | 8.135523   | C | 0.000000  | -32.558524 | 0.870181  |
| C | 0.000000  | 0.000000   | -4.410197  | C | 0.000000  | -32.565067 | -0.355229 |
| C | 0.000000  | 8.314387   | 9.232045   | C | 0.000000  | -27.790714 | 7.475986  |
| H | 0.000000  | 8.438312   | 10.317554  | C | 0.736317  | -25.328926 | 8.692925  |
| C | 0.000000  | -8.314387  | 9.232045   | C | -0.736317 | -25.328926 | 8.692925  |
| H | 0.000000  | -8.438312  | 10.317554  | C | 0.736419  | -32.519227 | -3.100946 |
| C | 0.000000  | -3.591571  | 6.919583   | C | -0.736419 | -32.519227 | -3.100946 |
| C | 0.000000  | -4.679549  | 7.482611   | B | 0.000000  | -32.465861 | 4.955117  |
| C | 0.000000  | 0.000000   | 0.860616   | C | 0.000000  | -32.506721 | 3.452457  |
| C | 0.000000  | 0.000000   | -0.364720  | C | 0.000000  | -32.539503 | 2.223782  |
| C | 0.000000  | 4.679549   | 7.482611   | C | 0.000000  | -28.877046 | 6.908928  |
| C | 0.000000  | -9.563999  | 8.509197   | C | 0.000000  | -30.071727 | 6.272248  |
| C | 0.000000  | -10.617867 | 7.897582   | C | 0.000000  | -31.148853 | 5.680263  |
| C | 0.000000  | -11.785485 | 7.209661   | C | 0.000000  | -31.244846 | -5.166545 |
| C | 0.736708  | -7.143916  | 8.694898   | C | 0.000000  | -30.216253 | -5.819854 |
| C | -0.736708 | -7.143916  | 8.694898   | C | 0.000000  | -29.066771 | -6.538067 |
| C | 0.736708  | 7.143916   | 8.694898   | C | 0.000000  | -28.020355 | -7.175586 |
| C | -0.736708 | 7.143916   | 8.694898   | C | 0.000000  | -26.855038 | -7.867810 |
| C | 0.736266  | 0.000000   | -3.110262  | C | 0.000000  | -25.802947 | -8.482552 |
| C | -0.736266 | 0.000000   | -3.110262  | C | 0.000000  | -22.908569 | 8.509701  |
| B | 0.000000  | -22.253751 | -8.114494  | C | 0.000000  | -21.854504 | 7.898406  |
| B | 0.000000  | -16.236714 | 1.867056   | C | 0.000000  | -20.686889 | 7.210479  |
| B | 0.000000  | -10.222206 | -8.115983  | C | 0.000000  | -19.637698 | 6.577567  |
| C | 0.000000  | -16.236441 | 4.429031   | C | 0.000000  | -18.485599 | 5.864559  |
| C | 0.000000  | -24.554814 | -9.207640  | C | 0.000000  | -17.455398 | 5.214444  |
| H | 0.000000  | -24.679830 | -10.293023 | C | 0.000000  | 1.219084   | -5.195397 |
| C | 0.000000  | -7.922566  | -9.212379  | C | 0.000000  | 2.249473   | -5.845205 |
| H | 0.000000  | -7.798629  | -10.297894 | C | 0.000000  | 3.401643   | -6.558095 |
| C | 0.000000  | -12.645805 | -6.900539  | C | 0.000000  | 4.450982   | -7.190750 |
| C | 0.000000  | -11.557676 | -7.463281  | C | 0.000000  | 5.618859   | -7.878229 |
| C | 0.000000  | -16.236790 | -0.841803  | C | 0.000000  | 6.672896   | -8.489554 |
| C | 0.000000  | -16.236758 | 0.383537   | C | 0.000000  | 9.563999   | 8.509197  |
| C | 0.000000  | -20.917534 | -7.462808  | C | 0.000000  | 10.617867  | 7.897582  |
| C | 0.000000  | -4.450982  | -7.190750  | C | 0.000000  | 11.785485  | 7.209661  |
| C | 0.000000  | -3.401643  | -6.558095  | C | 0.000000  | 12.834790  | 6.576951  |
| C | 0.000000  | -2.249473  | -5.845205  | C | 0.000000  | 13.986931  | 5.864016  |
| C | 0.000000  | -1.219084  | -5.195397  | C | 0.000000  | 15.017272  | 5.214135  |
| C | 0.736690  | -9.093113  | -8.675201  | H | 0.000000  | -33.368568 | -4.995017 |
| C | -0.736690 | -9.093113  | -8.675201  | H | 0.000000  | -33.485177 | 5.576623  |
| C | 0.736808  | -23.383091 | -8.672591  | H | 0.000000  | 33.368568  | -4.995017 |
| C | -0.736808 | -23.383091 | -8.672591  | H | 0.000000  | 33.485177  | 5.576623  |

**POM-35**

E= -7104.26218706

v= 0.4619

|   |            |            |           |
|---|------------|------------|-----------|
| B | -8.146107  | -34.565307 | 0.000000  |
| B | 1.825818   | -40.649000 | 0.000000  |
| C | 4.372791   | -40.574054 | 0.000000  |
| C | -9.247530  | -32.267472 | 0.000000  |
| H | -10.333172 | -32.144738 | 0.000000  |
| C | -0.885274  | -40.669562 | 0.000000  |
| C | 0.340142   | -40.676817 | 0.000000  |
| C | -7.490349  | -35.898504 | 0.000000  |
| C | -8.708472  | -33.437326 | 0.736342  |
| C | -8.708472  | -33.437326 | -0.736342 |
| C | 3.085856   | -40.632107 | 0.736445  |
| C | 3.085856   | -40.632107 | -0.736445 |
| B | -4.970159  | -40.574048 | 0.000000  |
| C | -3.467525  | -40.616034 | 0.000000  |
| C | -2.238864  | -40.649739 | 0.000000  |
| C | -6.923160  | -36.984779 | 0.000000  |
| C | -6.286354  | -38.179397 | 0.000000  |
| C | -5.694533  | -39.256623 | 0.000000  |
| B | 8.102624   | -30.370993 | 0.000000  |
| B | -1.879162  | -24.349609 | 0.000000  |
| B | 8.112397   | -18.343935 | 0.000000  |
| C | -4.441088  | -24.347508 | 0.000000  |
| C | 9.197201   | -32.671373 | 0.000000  |
| H | 10.282622  | -32.795948 | 0.000000  |
| C | 9.213370   | -16.046479 | 0.000000  |
| H | 10.299090  | -15.924462 | 0.000000  |
| C | 6.892677   | -20.765389 | 0.000000  |
| C | 7.457279   | -19.678212 | 0.000000  |
| C | 0.829706   | -24.351714 | 0.000000  |
| C | -0.395642  | -24.350752 | 0.000000  |
| C | 7.450420   | -29.035033 | 0.000000  |
| C | 8.492487   | -14.795779 | 0.000000  |
| C | 7.882013   | -13.741244 | 0.000000  |
| C | 7.195125   | -12.573020 | 0.000000  |
| C | 8.674031   | -17.216054 | 0.736680  |
| C | 8.674031   | -17.216054 | -0.736680 |
| C | 8.661613   | -31.499874 | 0.736799  |
| C | 8.661613   | -31.499874 | -0.736799 |
| C | -3.141170  | -24.348495 | 0.736290  |
| C | -3.141170  | -24.348495 | -0.736290 |
| B | -8.127765  | -2.097897  | 0.000000  |
| B | 1.855631   | -8.118169  | 0.000000  |
| B | -8.136253  | -14.123779 | 0.000000  |
| C | 4.417529   | -8.120147  | 0.000000  |
| C | -9.225395  | 0.201112   | 0.000000  |
| H | -10.310937 | 0.324684   | 0.000000  |
| C | -9.237082  | -16.421243 | 0.000000  |
| H | -10.322799 | -16.543270 | 0.000000  |
| C | -6.916486  | -11.702292 | 0.000000  |
| C | -7.481130  | -12.789444 | 0.000000  |
| C | -0.853244  | -8.116098  | 0.000000  |
| C | 0.372100   | -8.117023  | 0.000000  |
| C | -7.474505  | -3.433128  | 0.000000  |
| C | -7.218628  | -19.894562 | 0.000000  |
| C | -6.586616  | -20.944297 | 0.000000  |
| C | -5.874551  | -22.096977 | 0.000000  |
| C | -5.225335  | -23.127745 | 0.000000  |
| C | -8.697833  | -15.251614 | 0.736701  |
| C | -8.697833  | -15.251614 | -0.736701 |
| C | -8.687767  | -0.969256  | 0.736693  |
| C | -8.687767  | -0.969256  | -0.736693 |
| C | 3.117618   | -8.119124  | 0.736296  |
| C | 3.117618   | -8.119124  | -0.736296 |
| B | -4.948176  | -8.113090  | 0.000000  |
| B | 4.924709   | -24.354919 | 0.000000  |
| C | 3.411658   | -24.353716 | 0.000000  |

|   |            |            |           |
|---|------------|------------|-----------|
| C | 2.183869   | -24.352755 | 0.000000  |
| C | 5.672211   | -23.041068 | 0.000000  |
| C | 6.258583   | -21.962381 | 0.000000  |
| C | -5.695829  | -9.426717  | 0.000000  |
| C | -6.282318  | -10.505354 | 0.000000  |
| C | -3.435188  | -8.114174  | 0.000000  |
| C | -2.207397  | -8.115082  | 0.000000  |
| C | 6.563153   | -11.523260 | 0.000000  |
| C | -7.905579  | -18.726372 | 0.000000  |
| C | -8.516123  | -17.671877 | 0.000000  |
| C | 5.851102   | -10.370574 | 0.000000  |
| C | 5.201877   | -9.339810  | 0.000000  |
| C | -6.911386  | -4.521071  | 0.000000  |
| C | -6.278903  | -5.718902  | 0.000000  |
| C | -5.693944  | -6.798367  | 0.000000  |
| C | 6.887663   | -27.946897 | 0.000000  |
| C | 6.255411   | -26.748951 | 0.000000  |
| C | 5.670484   | -25.669434 | 0.000000  |
| C | -5.227453  | -25.565855 | 0.000000  |
| C | -5.878414  | -26.595530 | 0.000000  |
| C | -6.592328  | -27.747068 | 0.000000  |
| C | -7.225871  | -28.795888 | 0.000000  |
| C | -7.914263  | -29.963231 | 0.000000  |
| C | -8.525935  | -31.017086 | 0.000000  |
| C | 8.472340   | -33.919616 | 0.000000  |
| C | 7.857017   | -34.971375 | 0.000000  |
| C | 7.163892   | -36.136154 | 0.000000  |
| C | 6.525580   | -37.182097 | 0.000000  |
| C | 5.806554   | -38.331066 | 0.000000  |
| C | 5.152382   | -39.359119 | 0.000000  |
| B | 8.127765   | 2.097897   | 0.000000  |
| B | -1.855631  | 8.118169   | 0.000000  |
| B | 8.136253   | 14.123779  | 0.000000  |
| C | -4.417529  | 8.120147   | 0.000000  |
| C | 9.225395   | -0.201112  | 0.000000  |
| H | 10.310937  | -0.324684  | 0.000000  |
| C | 9.237082   | 16.421243  | 0.000000  |
| H | 10.322799  | 16.543270  | 0.000000  |
| C | 6.916486   | 11.702292  | 0.000000  |
| C | 7.481130   | 12.789444  | 0.000000  |
| C | 0.853244   | 8.116098   | 0.000000  |
| C | -0.372100  | 8.117023   | 0.000000  |
| C | 7.474505   | 3.433128   | 0.000000  |
| C | 8.516123   | 17.671877  | 0.000000  |
| C | 7.905579   | 18.726372  | 0.000000  |
| C | 7.218628   | 19.894562  | 0.000000  |
| C | 8.697833   | 15.251614  | 0.736701  |
| C | 8.697833   | 15.251614  | -0.736701 |
| C | 8.687767   | 0.969256   | 0.736693  |
| C | 8.687767   | 0.969256   | -0.736693 |
| C | -3.117618  | 8.119124   | 0.736296  |
| C | -3.117618  | 8.119124   | -0.736296 |
| B | -8.102624  | 30.370993  | 0.000000  |
| B | 1.879162   | 24.349609  | 0.000000  |
| B | -8.112397  | 18.343935  | 0.000000  |
| C | 4.441088   | 24.347508  | 0.000000  |
| C | -9.197201  | 32.671373  | 0.000000  |
| H | -10.282622 | 32.795948  | 0.000000  |
| C | -9.213370  | 16.046479  | 0.000000  |
| H | -10.299090 | 15.924462  | 0.000000  |
| C | -6.892677  | 20.765389  | 0.000000  |
| C | -7.457279  | 19.678212  | 0.000000  |
| C | -0.829706  | 24.351714  | 0.000000  |
| C | 0.395642   | 24.350752  | 0.000000  |
| C | -7.450420  | 29.035033  | 0.000000  |
| C | -7.195125  | 12.573020  | 0.000000  |
| C | -6.563153  | 11.523260  | 0.000000  |
| C | -5.851102  | 10.370574  | 0.000000  |
| C | -5.201877  | 9.339810   | 0.000000  |

|   |           |           |           |
|---|-----------|-----------|-----------|
| C | -8.674031 | 17.216054 | 0.736680  |
| C | -8.674031 | 17.216054 | -0.736680 |
| C | -8.661613 | 31.499874 | 0.736799  |
| C | -8.661613 | 31.499874 | -0.736799 |
| C | 3.141170  | 24.348495 | 0.736290  |
| C | 3.141170  | 24.348495 | -0.736290 |
| B | -4.924709 | 24.354919 | 0.000000  |
| B | 4.948176  | 8.113090  | 0.000000  |
| C | 3.435188  | 8.114174  | 0.000000  |
| C | 2.207397  | 8.115082  | 0.000000  |
| C | 5.695829  | 9.426717  | 0.000000  |
| C | 6.282318  | 10.505354 | 0.000000  |
| C | -5.672211 | 23.041068 | 0.000000  |
| C | -6.258583 | 21.962381 | 0.000000  |
| C | -3.411658 | 24.353716 | 0.000000  |
| C | -2.183869 | 24.352755 | 0.000000  |
| C | 6.586616  | 20.944297 | 0.000000  |
| C | -7.882013 | 13.741244 | 0.000000  |
| C | -8.492487 | 14.795779 | 0.000000  |
| C | 5.874551  | 22.096977 | 0.000000  |
| C | 5.225335  | 23.127745 | 0.000000  |
| C | -6.887663 | 27.946897 | 0.000000  |
| C | -6.255411 | 26.748951 | 0.000000  |
| C | -5.670484 | 25.669434 | 0.000000  |
| C | 6.911386  | 4.521071  | 0.000000  |
| C | 6.278903  | 5.718902  | 0.000000  |
| C | 5.693944  | 6.798367  | 0.000000  |
| B | 8.146107  | 34.565307 | 0.000000  |
| B | -1.825818 | 40.649000 | 0.000000  |
| C | -4.372791 | 40.574054 | 0.000000  |
| C | 9.247530  | 32.267472 | 0.000000  |
| H | 10.333172 | 32.144738 | 0.000000  |
| C | 0.885274  | 40.669562 | 0.000000  |
| C | -0.340142 | 40.676817 | 0.000000  |
| C | 7.490349  | 35.898504 | 0.000000  |
| C | 8.708472  | 33.437326 | 0.736342  |
| C | 8.708472  | 33.437326 | -0.736342 |
| C | -3.085856 | 40.632107 | 0.736445  |
| C | -3.085856 | 40.632107 | -0.736445 |
| B | 4.970159  | 40.574048 | 0.000000  |
| C | 3.467525  | 40.616034 | 0.000000  |
| C | 2.238864  | 40.649739 | 0.000000  |
| C | 6.923160  | 36.984779 | 0.000000  |
| C | 6.286354  | 38.179397 | 0.000000  |
| C | 5.694533  | 39.256623 | 0.000000  |
| C | -5.152382 | 39.359119 | 0.000000  |
| C | -5.806554 | 38.331066 | 0.000000  |
| C | -6.525580 | 37.182097 | 0.000000  |
| C | -7.163892 | 36.136154 | 0.000000  |
| C | -7.857017 | 34.971375 | 0.000000  |
| C | -8.472340 | 33.919616 | 0.000000  |
| C | 8.525935  | 31.017086 | 0.000000  |
| C | 7.914263  | 29.963231 | 0.000000  |
| C | 7.225871  | 28.795888 | 0.000000  |
| C | 6.592328  | 27.747068 | 0.000000  |
| C | 5.878414  | 26.595530 | 0.000000  |
| C | 5.227453  | 25.565855 | 0.000000  |
| C | -5.203748 | 6.901680  | 0.000000  |
| C | -5.854556 | 5.871916  | 0.000000  |
| C | -6.568374 | 4.720324  | 0.000000  |
| C | -7.201949 | 3.671531  | 0.000000  |
| C | -7.890606 | 2.504349  | 0.000000  |
| C | -8.502671 | 1.450737  | 0.000000  |
| C | 8.502671  | -1.450737 | 0.000000  |
| C | 7.890606  | -2.504349 | 0.000000  |
| C | 7.201949  | -3.671531 | 0.000000  |
| C | 6.568374  | -4.720324 | 0.000000  |
| C | 5.854556  | -5.871916 | 0.000000  |
| C | 5.203748  | -6.901680 | 0.000000  |

|   |           |            |          |
|---|-----------|------------|----------|
| H | -4.979402 | 41.482728  | 0.000000 |
| H | 5.592272  | 41.592865  | 0.000000 |
| H | -5.592272 | -41.592865 | 0.000000 |
| H | 4.979402  | -41.482728 | 0.000000 |

**POM-36**

E= -4098.00746873

v= 2.3126

|   |            |            |           |
|---|------------|------------|-----------|
| B | -5.880136  | -15.290400 | 0.000000  |
| B | 5.880136   | -15.290400 | 0.000000  |
| C | 8.043261   | -13.943386 | 0.000000  |
| C | -8.043261  | -13.943386 | 0.000000  |
| H | -9.025042  | -14.422697 | 0.000000  |
| B | 0.000000   | -18.699509 | 0.000000  |
| C | 4.611955   | -16.064617 | 0.000000  |
| C | -4.611955  | -16.064617 | 0.000000  |
| C | -6.960291  | -14.640851 | 0.736331  |
| C | -6.960291  | -14.640851 | -0.736331 |
| C | 6.960291   | -14.640851 | 0.736331  |
| C | 6.960291   | -14.640851 | -0.736331 |
| B | 5.891123   | -3.401242  | 0.000000  |
| B | -5.891123  | -3.401242  | 0.000000  |
| B | 0.000000   | 6.802483   | 0.000000  |
| C | -8.109569  | -4.682062  | 0.000000  |
| C | 8.109569   | -4.682062  | 0.000000  |
| C | 0.000000   | 9.364123   | 0.000000  |
| B | 0.000000   | 0.000000   | 0.000000  |
| C | 0.000000   | 1.511766   | 0.000000  |
| C | -4.606224  | -2.659404  | 0.000000  |
| C | 4.606224   | -2.659404  | 0.000000  |
| C | -4.504392  | 12.055555  | 0.000000  |
| C | -5.696377  | 12.700330  | 0.000000  |
| C | -6.773656  | 13.269733  | 0.000000  |
| C | 0.000000   | 8.064064   | 0.736429  |
| C | 0.000000   | 8.064064   | -0.736429 |
| C | 6.983684   | -4.032032  | 0.736429  |
| C | 6.983684   | -4.032032  | -0.736429 |
| C | -6.983684  | -4.032032  | 0.736429  |
| C | -6.983684  | -4.032032  | -0.736429 |
| B | -10.301807 | 12.737547  | 0.000000  |
| B | -16.181943 | 2.552853   | 0.000000  |
| C | -8.053696  | 13.937362  | 0.000000  |
| H | -7.977901  | 15.027264  | 0.000000  |
| C | -16.096957 | 0.006024   | 0.000000  |
| H | -17.002943 | -0.604567  | 0.000000  |
| B | -16.194250 | 9.349755   | 0.000000  |
| C | -16.203492 | 7.846482   | 0.000000  |
| C | -11.606389 | 12.026379  | 0.000000  |
| C | -14.878754 | -0.768708  | 0.000000  |
| C | -13.846997 | -1.416958  | 0.000000  |
| C | -12.692613 | -2.126860  | 0.000000  |
| C | -16.159495 | 1.292636   | 0.736331  |
| C | -16.159495 | 1.292636   | -0.736331 |
| C | -9.199203  | 13.348215  | 0.736331  |
| C | -9.199203  | 13.348215  | -0.736331 |
| B | 10.301807  | 12.737547  | 0.000000  |
| B | 16.181943  | 2.552853   | 0.000000  |
| C | 8.053696   | 13.937362  | 0.000000  |
| H | 7.977901   | 15.027264  | 0.000000  |
| C | 16.096957  | 0.006024   | 0.000000  |
| B | 16.194250  | 9.349755   | 0.000000  |
| C | 16.203492  | 7.846482   | 0.000000  |
| C | 11.606389  | 12.026379  | 0.000000  |
| C | 16.159495  | 1.292636   | 0.736331  |
| C | 16.159495  | 1.292636   | -0.736331 |
| C | 9.199203   | 13.348215  | 0.736331  |
| C | 9.199203   | 13.348215  | -0.736331 |
| C | 8.105098   | -12.501025 | 0.000000  |
| C | 8.150620   | -11.283372 | 0.000000  |



|   |            |            |          |
|---|------------|------------|----------|
| C | 8.188221   | -9.928695  | 0.000000 |
| C | -8.188221  | -9.928695  | 0.000000 |
| C | -8.150620  | -11.283372 | 0.000000 |
| C | -8.105098  | -12.501025 | 0.000000 |
| C | 14.878754  | -0.768708  | 0.000000 |
| C | 13.846997  | -1.416958  | 0.000000 |
| C | 12.692613  | -2.126860  | 0.000000 |
| C | 6.773656   | 13.269733  | 0.000000 |
| C | 5.696377   | 12.700330  | 0.000000 |
| C | 4.504392   | 12.055555  | 0.000000 |
| H | 9.025042   | -14.422697 | 0.000000 |
| H | 17.002943  | -0.604567  | 0.000000 |
| H | -17.228151 | 9.946678   | 0.000000 |
| H | 0.000000   | -19.893355 | 0.000000 |
| H | 17.228151  | 9.946678   | 0.000000 |
| C | -16.218866 | 6.617466   | 0.000000 |
| C | -16.222669 | 5.263685   | 0.000000 |
| C | -16.218344 | 4.038238   | 0.000000 |
| C | 0.000000   | 2.739524   | 0.000000 |
| C | 0.000000   | 4.093539   | 0.000000 |
| C | 0.000000   | 5.318809   | 0.000000 |
| C | 16.218866  | 6.617466   | 0.000000 |
| C | 16.222669  | 5.263685   | 0.000000 |
| C | 16.218344  | 4.038238   | 0.000000 |
| C | -8.203688  | -8.703475  | 0.000000 |
| C | -8.196472  | -7.348599  | 0.000000 |
| C | -8.174711  | -6.130617  | 0.000000 |
| C | 8.203688   | -8.703475  | 0.000000 |
| C | 8.196472   | -7.348599  | 0.000000 |
| C | 8.174711   | -6.130617  | 0.000000 |
| C | -12.669820 | 11.417401  | 0.000000 |
| C | -13.840327 | 10.737217  | 0.000000 |
| C | -14.896999 | 10.109394  | 0.000000 |
| C | -3.545109  | -2.046769  | 0.000000 |
| C | -2.372497  | -1.369762  | 0.000000 |
| C | -1.309228  | -0.755883  | 0.000000 |
| C | 3.552849   | -16.681086 | 0.000000 |
| C | 2.378540   | -17.354683 | 0.000000 |
| C | 1.306493   | -17.955877 | 0.000000 |
| C | -3.435586  | 11.456340  | 0.000000 |
| C | -2.265838  | 10.772653  | 0.000000 |
| C | -1.221915  | 10.144816  | 0.000000 |
| C | -11.639274 | -2.752865  | 0.000000 |
| C | -10.462310 | -3.424053  | 0.000000 |
| C | -9.396626  | -4.014199  | 0.000000 |
| C | 12.669820  | 11.417401  | 0.000000 |
| C | 13.840327  | 10.737217  | 0.000000 |
| C | 14.896999  | 10.109394  | 0.000000 |
| C | 3.545109   | -2.046769  | 0.000000 |
| C | 2.372497   | -1.369762  | 0.000000 |
| C | 1.309228   | -0.755883  | 0.000000 |
| C | -3.552849  | -16.681086 | 0.000000 |
| C | -2.378540  | -17.354683 | 0.000000 |
| C | -1.306493  | -17.955877 | 0.000000 |
| C | 3.435586   | 11.456340  | 0.000000 |
| C | 2.265838   | 10.772653  | 0.000000 |
| C | 1.221915   | 10.144816  | 0.000000 |
| C | 11.639274  | -2.752865  | 0.000000 |
| C | 10.462310  | -3.424053  | 0.000000 |
| C | 9.396626   | -4.014199  | 0.000000 |

**C1**

E= -3177.96236744

v= 3.7856

|   |           |           |           |
|---|-----------|-----------|-----------|
| B | 0.358497  | -5.485616 | -5.914853 |
| B | 5.875534  | -5.555048 | -1.196814 |
| C | -2.162747 | -5.531699 | -6.275028 |
| H | -2.608352 | -5.539047 | -7.272513 |
| C | 6.595916  | -5.564289 | 1.281226  |

|   |           |           |           |
|---|-----------|-----------|-----------|
| H | 7.644861  | -5.546011 | 1.581177  |
| B | 4.513454  | -5.424764 | -5.183952 |
| C | 5.020984  | -5.469278 | -3.761646 |
| C | 5.430534  | -5.506801 | -2.606815 |
| C | 3.034724  | -5.443016 | -5.461818 |
| C | 1.829485  | -5.461263 | -5.685009 |
| C | 5.655494  | -5.570024 | 2.370536  |
| C | 4.859906  | -5.565129 | 3.290820  |
| C | 3.955664  | -5.557392 | 4.309300  |
| C | 3.136354  | -5.548211 | 5.207873  |
| C | 6.272917  | -6.200387 | 0.014536  |
| C | -0.871529 | -6.245765 | -6.112182 |
| B | -0.358512 | -5.485539 | 5.914857  |
| B | -5.875550 | -5.555014 | 1.196818  |
| C | 2.162731  | -5.531626 | 6.275034  |
| H | 2.608335  | -5.538964 | 7.272519  |
| C | -6.595933 | -5.564289 | -1.281221 |
| H | -7.644878 | -5.546017 | -1.581173 |
| B | -4.513470 | -5.424681 | 5.183955  |
| C | -5.020999 | -5.469211 | 3.761649  |
| C | -5.430550 | -5.506748 | 2.606819  |
| C | -3.034739 | -5.442934 | 5.461821  |
| C | -1.829500 | -5.461184 | 5.685012  |
| C | -5.655511 | -5.570036 | -2.370531 |
| C | -4.859922 | -5.565154 | -3.290814 |
| C | -3.955679 | -5.557435 | -4.309294 |
| C | -3.136369 | -5.548271 | -5.207867 |
| C | -6.272932 | -6.200370 | -0.014522 |
| C | 0.871511  | -6.245690 | 6.112194  |
| B | 0.358532  | 5.485607  | -5.914852 |
| B | 5.875559  | 5.555035  | -1.196806 |
| C | -2.162712 | 5.531691  | -6.275028 |
| H | -2.608316 | 5.539035  | -7.272513 |
| C | 6.595932  | 5.564273  | 1.281236  |
| H | 7.644876  | 5.545991  | 1.581192  |
| B | 4.513489  | 5.424755  | -5.183948 |
| C | 5.021017  | 5.469268  | -3.761641 |
| C | 5.430564  | 5.506790  | -2.606809 |
| C | 3.034759  | 5.443006  | -5.461816 |
| C | 1.829519  | 5.461253  | -5.685008 |
| C | 5.655505  | 5.570010  | 2.370542  |
| C | 4.859911  | 5.565119  | 3.290820  |
| C | 3.955665  | 5.557385  | 4.309297  |
| C | 3.136352  | 5.548206  | 5.207868  |
| C | 6.272941  | 6.200372  | 0.014545  |
| C | -0.871494 | 6.245756  | -6.112183 |
| B | -0.358514 | 5.485541  | 5.914851  |
| B | -5.875542 | 5.555032  | 1.196806  |
| C | 2.162729  | 5.531619  | 6.275028  |
| H | 2.608333  | 5.538954  | 7.272513  |
| C | -6.595916 | 5.564303  | -1.281236 |
| H | -7.644860 | 5.546034  | -1.581192 |
| B | -4.513472 | 5.424699  | 5.183946  |
| C | -5.020999 | 5.469231  | 3.761639  |
| C | -5.430547 | 5.506769  | 2.606808  |
| C | -3.034741 | 5.442946  | 5.461814  |
| C | -1.829502 | 5.461190  | 5.685006  |
| C | -5.655489 | 5.570048  | -2.370542 |
| C | -4.859895 | 5.565163  | -3.290820 |
| C | -3.955648 | 5.557439  | -4.309297 |
| C | -3.136335 | 5.548268  | -5.207868 |
| C | -6.272920 | 6.200387  | -0.014537 |
| C | 0.871511  | 6.245687  | 6.112190  |
| C | 6.269742  | -4.734825 | 0.023663  |
| C | 0.898568  | -4.775107 | 6.113057  |
| C | -6.269761 | -4.734808 | -0.023670 |
| C | -0.898581 | -4.775182 | -6.113061 |
| C | -0.898548 | 4.775173  | -6.113056 |
| C | 6.269762  | 4.734810  | 0.023671  |

|    |           |           |           |
|----|-----------|-----------|-----------|
| C  | -6.269751 | 4.734825  | -0.023682 |
| C  | 0.898564  | 4.775104  | 6.113049  |
| C  | 6.337862  | -0.620792 | -0.217437 |
| C  | -6.337863 | -0.620776 | 0.217436  |
| C  | -6.337862 | 0.620793  | 0.217434  |
| C  | 6.337864  | 0.620777  | -0.217435 |
| H  | -5.293666 | -5.384776 | 6.084775  |
| H  | -5.293669 | 5.384798  | 6.084765  |
| H  | 5.293686  | 5.384862  | -6.084768 |
| H  | 5.293651  | -5.384874 | -6.084773 |
| Ag | -6.280765 | -2.628914 | 0.145248  |
| Ag | -6.280760 | 2.628932  | 0.145240  |
| Ag | 6.280768  | 2.628916  | -0.145245 |
| Ag | 6.280755  | -2.628930 | -0.145251 |

**C2**

E= -5137.15103626

v= 2.4447

|   |            |           |           |
|---|------------|-----------|-----------|
| B | -0.124428  | 3.621901  | 4.731550  |
| B | 0.124414   | -3.621922 | 4.731554  |
| C | -0.100818  | 5.790628  | 3.334562  |
| H | -0.101127  | 6.778035  | 3.799006  |
| C | 0.100806   | -5.790650 | 3.334568  |
| H | 0.101112   | -6.778057 | 3.799013  |
| B | -0.000009  | -0.000009 | 6.881005  |
| C | 0.050741   | -1.305551 | 6.127292  |
| C | 0.086145   | -2.365410 | 5.512406  |
| C | -0.050758  | 1.305532  | 6.127291  |
| C | -0.086161  | 2.365390  | 5.512404  |
| C | 0.063030   | -5.802469 | 1.895791  |
| C | 0.022830   | -5.817620 | 0.680330  |
| C | -0.022826  | -5.817619 | -0.680283 |
| C | -0.063026  | -5.802468 | -1.895744 |
| C | 0.752842   | -4.711067 | 4.055458  |
| C | 0.712474   | 4.719577  | 4.087923  |
| B | -0.124415  | -3.621926 | -4.731511 |
| B | 0.124426   | 3.621894  | -4.731515 |
| C | -0.100805  | -5.790652 | -3.334522 |
| H | -0.101113  | -6.778060 | -3.798965 |
| C | 0.100817   | 5.790621  | -3.334528 |
| H | 0.101130   | 6.778029  | -3.798972 |
| B | 0.000009   | -0.000017 | -6.880968 |
| C | 0.050757   | 1.305524  | -6.127256 |
| C | 0.086160   | 2.365383  | -5.512369 |
| C | -0.050743  | -1.305557 | -6.127255 |
| C | -0.086147  | -2.365416 | -5.512367 |
| C | 0.063032   | 5.802439  | -1.895750 |
| C | 0.022827   | 5.817592  | -0.680289 |
| C | -0.022833  | 5.817594  | 0.680324  |
| C | -0.063037  | 5.802445  | 1.895785  |
| C | 0.752855   | 4.711037  | -4.055414 |
| C | 0.712487   | -4.719601 | -4.087883 |
| B | -10.958056 | 3.682422  | 4.647714  |
| B | -11.001515 | -3.575193 | 4.808998  |
| C | -11.014813 | 5.800495  | 3.233739  |
| H | -11.032839 | 6.797901  | 3.679194  |
| C | -11.009410 | -5.765351 | 3.443854  |
| H | -10.983171 | -6.746452 | 3.920663  |
| B | -10.879151 | 0.098463  | 6.872731  |
| C | -10.919560 | -1.227945 | 6.150514  |
| C | -10.954844 | -2.303052 | 5.562579  |
| C | -10.903596 | 1.386004  | 6.094290  |
| C | -10.927189 | 2.433086  | 5.457263  |
| C | -11.024284 | -5.792488 | 2.005099  |
| C | -11.026592 | -5.815234 | 0.788805  |
| C | -11.026606 | -5.822590 | -0.573166 |
| C | -11.024032 | -5.813026 | -1.789181 |
| C | -11.645431 | -4.682403 | 4.175666  |
| C | -11.723139 | 4.724117  | 3.970400  |
| B | -10.958055 | -3.682410 | -4.647740 |

|    |            |           |           |
|----|------------|-----------|-----------|
| B  | -11.001500 | 3.575205  | -4.809024 |
| C  | -11.014822 | -5.800483 | -3.233765 |
| H  | -11.032853 | -6.797889 | -3.679220 |
| C  | -11.009398 | 5.765363  | -3.443880 |
| H  | -10.983158 | 6.746464  | -3.920689 |
| B  | -10.879135 | -0.098452 | -6.872757 |
| C  | -10.919544 | 1.227957  | -6.150540 |
| C  | -10.954828 | 2.303064  | -5.562605 |
| C  | -10.903585 | -1.385992 | -6.094316 |
| C  | -10.927182 | -2.433075 | -5.457289 |
| C  | -11.024275 | 5.792500  | -2.005125 |
| C  | -11.026584 | 5.815246  | -0.788831 |
| C  | -11.026598 | 5.822602  | 0.573140  |
| C  | -11.024024 | 5.813038  | 1.789154  |
| C  | -11.645418 | 4.682415  | -4.175694 |
| C  | -11.723143 | -4.724101 | -3.970426 |
| C  | -0.712487  | -4.719597 | 4.087925  |
| C  | -0.752843  | -4.711070 | -4.055412 |
| C  | -0.712475  | 4.719572  | -4.087890 |
| C  | -0.752855  | 4.711045  | 4.055451  |
| C  | -10.252731 | 4.757149  | 3.960463  |
| C  | -10.180077 | -4.678731 | 4.156973  |
| C  | -10.180064 | 4.678743  | -4.156997 |
| C  | -10.252736 | -4.757141 | -3.960490 |
| C  | -4.822575  | -4.572734 | 4.346499  |
| C  | -4.822561  | 4.572725  | -4.346496 |
| C  | -6.064105  | 4.563990  | -4.350322 |
| C  | -6.064118  | -4.563992 | 4.350316  |
| H  | 0.000011   | -0.000018 | -8.072506 |
| H  | -10.837362 | -0.117281 | -8.064219 |
| H  | -10.837383 | 0.117292  | 8.064193  |
| H  | -0.000011  | -0.000009 | 8.072543  |
| Ag | -2.815216  | 4.600812  | -4.248678 |
| Ag | -8.073155  | 4.569343  | -4.273221 |
| Ag | -8.073168  | -4.569337 | 4.273205  |
| Ag | -2.815229  | -4.600829 | 4.248696  |
| B  | 11.001510  | 3.575212  | 4.808998  |
| B  | 10.958096  | -3.682403 | 4.647711  |
| C  | 11.009387  | 5.765370  | 3.443855  |
| H  | 10.983143  | 6.746471  | 3.920665  |
| C  | 11.014860  | -5.800475 | 3.233734  |
| H  | 11.032896  | -6.797881 | 3.679188  |
| B  | 10.879178  | -0.098447 | 6.872730  |
| C  | 10.903628  | -1.385987 | 6.094289  |
| C  | 10.927223  | -2.433068 | 5.457260  |
| C  | 10.919575  | 1.227963  | 6.150514  |
| C  | 10.954849  | 2.303070  | 5.562579  |
| C  | 11.024066  | -5.813017 | 1.789149  |
| C  | 11.026635  | -5.822580 | 0.573135  |
| C  | 11.026617  | -5.815225 | -0.788836 |
| C  | 11.024303  | -5.792478 | -2.005130 |
| C  | 10.252775  | -4.757135 | 3.960462  |
| B  | 11.001506  | -3.575182 | -4.809029 |
| B  | 10.958019  | 3.682432  | -4.647740 |
| C  | 11.009419  | -5.765340 | -3.443885 |
| H  | 10.983182  | -6.746442 | -3.920695 |
| C  | 11.014777  | 5.800504  | -3.233764 |
| H  | 11.032798  | 6.797911  | -3.679218 |
| B  | 10.879113  | 0.098475  | -6.872759 |
| C  | 10.903559  | 1.386015  | -6.094318 |
| C  | 10.927151  | 2.433097  | -5.457290 |
| C  | 10.919532  | -1.227934 | -6.150544 |
| C  | 10.954824  | -2.303041 | -5.562609 |
| C  | 11.023994  | 5.813046  | -1.789179 |
| C  | 11.026571  | 5.822610  | -0.573165 |
| C  | 11.026562  | 5.815254  | 0.788806  |
| C  | 11.024258  | 5.792508  | 2.005101  |
| C  | 10.252695  | 4.757157  | -3.960485 |
| C  | 11.645417  | 4.682426  | 4.175665  |

|    |           |           |           |
|----|-----------|-----------|-----------|
| C  | 11.723182 | -4.724092 | 3.970392  |
| C  | 11.723102 | 4.724128  | -3.970429 |
| C  | 11.645431 | -4.682389 | -4.175701 |
| H  | 10.837336 | 0.117304  | -8.064221 |
| H  | 10.837416 | -0.117277 | 8.064192  |
| C  | 10.180063 | 4.678745  | 4.156976  |
| C  | 10.180077 | -4.678724 | -4.156999 |
| Ag | 8.073154  | 4.569342  | 4.273210  |
| Ag | 8.073167  | -4.569337 | -4.273214 |
| C  | 6.064105  | 4.563988  | 4.350324  |
| C  | 6.064117  | -4.563996 | -4.350310 |
| C  | 4.822561  | 4.572724  | 4.346506  |
| C  | 4.822573  | -4.572739 | -4.346482 |
| Ag | 2.815216  | 4.600814  | 4.248700  |
| Ag | 2.815228  | -4.600835 | -4.248666 |

**C3**

E= -7096.3394644

v= 1.3415

|   |            |           |           |
|---|------------|-----------|-----------|
| B | -5.571616  | 0.101714  | 5.952141  |
| B | -5.351731  | -5.731620 | 1.653642  |
| C | -5.546758  | 2.676227  | 6.118260  |
| H | -5.538541  | 3.193405  | 7.079069  |
| C | -5.385151  | -6.646336 | -0.758212 |
| H | -5.394274  | -7.716358 | -0.971847 |
| B | -5.457025  | -4.089382 | 5.532559  |
| C | -5.413385  | -4.694032 | 4.151388  |
| C | -5.383656  | -5.183086 | 3.027738  |
| C | -5.502807  | -2.591004 | 5.699861  |
| C | -5.535324  | -1.372944 | 5.833687  |
| C | -5.416077  | -5.799891 | -1.921964 |
| C | -5.449348  | -5.088266 | -2.907710 |
| C | -5.486635  | -4.278010 | -4.001079 |
| C | -5.518927  | -3.541950 | -4.968740 |
| C | -4.727849  | -6.212205 | 0.462657  |
| C | -4.733336  | 1.366861  | 6.079331  |
| B | -5.571609  | -0.101747 | -5.952139 |
| B | -5.351669  | 5.731584  | -1.653639 |
| C | -5.546779  | -2.676261 | -6.118256 |
| H | -5.538568  | -3.193439 | -7.079064 |
| C | -5.385083  | 6.646299  | 0.758215  |
| H | -5.394193  | 7.716322  | 0.971851  |
| B | -5.456973  | 4.089348  | -5.532556 |
| C | -5.413329  | 4.693997  | -4.151385 |
| C | -5.383596  | 5.183051  | -3.027735 |
| C | -5.502771  | 2.590970  | -5.699859 |
| C | -5.535301  | 1.372911  | -5.833685 |
| C | -5.416022  | 5.799854  | 1.921968  |
| C | -5.449302  | 5.088231  | 2.907714  |
| C | -5.486598  | 4.277976  | 4.001084  |
| C | -5.518897  | 3.541917  | 4.968745  |
| C | -4.727783  | 6.212160  | -0.462652 |
| C | -4.733343  | -1.366903 | -6.079329 |
| B | -16.443192 | 0.226913  | 5.926806  |
| B | -16.481715 | -5.723674 | 1.768843  |
| C | -16.502565 | 2.771144  | 6.036759  |
| H | -16.522655 | 3.312962  | 6.985229  |
| C | -16.490259 | -6.684969 | -0.626322 |
| H | -16.462610 | -7.758302 | -0.820720 |
| B | -16.359722 | -3.979107 | 5.604387  |
| C | -16.399640 | -4.622399 | 4.237912  |
| C | -16.434849 | -5.142341 | 3.128325  |
| C | -16.385781 | -2.480453 | 5.737200  |
| C | -16.410718 | -1.259327 | 5.841928  |
| C | -16.507106 | -5.857449 | -1.803538 |
| C | -16.510757 | -5.157836 | -2.798736 |
| C | -16.512150 | -4.359778 | -3.902416 |
| C | -16.510684 | -3.634210 | -4.878290 |

|    |            |           |           |
|----|------------|-----------|-----------|
| C  | -17.125697 | -6.243972 | 0.604272  |
| C  | -17.209520 | 1.466802  | 5.994339  |
| B  | -16.443203 | -0.226834 | -5.926778 |
| B  | -16.481659 | 5.723754  | -1.768816 |
| C  | -16.502597 | -2.771065 | -6.036732 |
| H  | -16.522690 | -3.312883 | -6.985202 |
| C  | -16.490183 | 6.685049  | 0.626349  |
| H  | -16.462518 | 7.758381  | 0.820747  |
| B  | -16.359696 | 3.979185  | -5.604360 |
| C  | -16.399605 | 4.622477  | -4.237885 |
| C  | -16.434804 | 5.142420  | -3.128298 |
| C  | -16.385769 | 2.480531  | -5.737172 |
| C  | -16.410716 | 1.259405  | -5.841901 |
| C  | -16.507037 | 5.857528  | 1.803566  |
| C  | -16.510695 | 5.157915  | 2.798763  |
| C  | -16.512099 | 4.359856  | 3.902442  |
| C  | -16.510642 | 3.634288  | 4.878317  |
| C  | -17.125630 | 6.244060  | -0.604243 |
| C  | -17.209541 | -1.466718 | -5.994313 |
| C  | -6.193428  | -6.226016 | 0.484801  |
| C  | -6.198788  | -1.379623 | -6.061204 |
| C  | -6.193362  | 6.225989  | -0.484799 |
| C  | -6.198781  | 1.379597  | 6.061208  |
| C  | -15.739164 | 1.500725  | 6.008235  |
| C  | -15.660459 | -6.227713 | 0.590207  |
| C  | -15.660393 | 6.227781  | -0.590182 |
| C  | -15.739186 | -1.500653 | -6.008206 |
| C  | -10.302084 | -6.245618 | 0.792158  |
| C  | -10.302018 | 6.245641  | -0.792152 |
| C  | -11.543532 | 6.241350  | -0.803929 |
| C  | -11.543598 | -6.241323 | 0.803939  |
| H  | -5.455017  | 4.795712  | -6.492113 |
| H  | -16.316983 | 4.668048  | -6.576627 |
| H  | -16.317014 | -4.667971 | 6.576654  |
| H  | -5.455079  | -4.795746 | 6.492116  |
| Ag | -8.295173  | 6.214862  | -0.690671 |
| Ag | -13.553001 | 6.203907  | -0.743792 |
| Ag | -13.553066 | -6.203863 | 0.743810  |
| Ag | -8.295239  | -6.214861 | 0.690673  |
| B  | 16.443063  | 0.226866  | 5.926859  |
| B  | 16.481684  | -5.723688 | 1.768849  |
| C  | 16.502424  | 2.771097  | 6.036836  |
| H  | 16.522487  | 3.312907  | 6.985311  |
| C  | 16.490268  | -6.684962 | -0.626324 |
| H  | 16.462619  | -7.758293 | -0.820732 |
| B  | 16.359617  | -3.979152 | 5.604404  |
| C  | 16.399563  | -4.622432 | 4.237925  |
| C  | 16.434793  | -5.142366 | 3.128335  |
| C  | 16.385667  | -2.480498 | 5.737230  |
| C  | 16.410597  | -1.259373 | 5.841968  |
| C  | 16.507139  | -5.857431 | -1.803533 |
| C  | 16.510812  | -5.157808 | -2.798723 |
| C  | 16.512235  | -4.359736 | -3.902393 |
| C  | 16.510795  | -3.634156 | -4.878260 |
| C  | 17.125685  | -6.243977 | 0.604285  |
| C  | 17.209385  | 1.466758  | 5.994423  |
| B  | 16.443338  | -0.226773 | -5.926722 |
| B  | 16.481693  | 5.723780  | -1.768711 |
| C  | 16.502740  | -2.771002 | -6.036695 |
| H  | 16.522860  | -3.312812 | -6.985169 |
| C  | 16.490165  | 6.685053  | 0.626463  |
| H  | 16.462496  | 7.758384  | 0.820870  |
| B  | 16.359817  | 3.979244  | -5.604273 |
| C  | 16.399693  | 4.622525  | -4.237792 |
| C  | 16.434868  | 5.142459  | -3.128199 |
| C  | 16.385894  | 2.480591  | -5.737097 |
| C  | 16.410846  | 1.259466  | -5.841833 |
| C  | 16.506995  | 5.857522  | 1.803672  |
| C  | 16.510630  | 5.157899  | 2.798863  |

|    |           |           |           |
|----|-----------|-----------|-----------|
| C  | 16.512008 | 4.359829  | 3.902534  |
| C  | 16.510527 | 3.634251  | 4.878401  |
| C  | 17.125639 | 6.244076  | -0.604119 |
| C  | 17.209680 | -1.466654 | -5.994245 |
| B  | 5.571613  | 0.101679  | 5.952086  |
| B  | 5.351715  | -5.731650 | 1.653576  |
| C  | 5.546773  | 2.676192  | 6.118209  |
| H  | 5.538566  | 3.193368  | 7.079019  |
| C  | 5.385142  | -6.646365 | -0.758278 |
| H  | 5.394267  | -7.716387 | -0.971913 |
| B  | 5.457003  | -4.089416 | 5.532495  |
| C  | 5.413363  | -4.694064 | 4.151323  |
| C  | 5.383636  | -5.183118 | 3.027673  |
| C  | 5.502790  | -2.591038 | 5.699800  |
| C  | 5.535313  | -1.372979 | 5.833628  |
| C  | 5.416069  | -5.799919 | -1.922030 |
| C  | 5.449340  | -5.088293 | -2.907775 |
| C  | 5.486626  | -4.278035 | -4.001142 |
| C  | 5.518915  | -3.541974 | -4.968803 |
| C  | 4.727836  | -6.212235 | 0.462589  |
| B  | 5.571612  | -0.101769 | -5.952192 |
| B  | 5.351685  | 5.731558  | -1.653684 |
| C  | 5.546767  | -2.676282 | -6.118316 |
| H  | 5.538548  | -3.193458 | -7.079126 |
| C  | 5.385084  | 6.646271  | 0.758171  |
| H  | 5.394187  | 7.716294  | 0.971807  |
| B  | 5.456999  | 4.089325  | -5.532602 |
| C  | 5.413354  | 4.693974  | -4.151431 |
| C  | 5.383618  | 5.183026  | -3.027781 |
| C  | 5.502790  | 2.590948  | -5.699907 |
| C  | 5.535313  | 1.372889  | -5.833735 |
| C  | 5.416025  | 5.799825  | 1.921922  |
| C  | 5.449308  | 5.088200  | 2.907668  |
| C  | 5.486607  | 4.277943  | 4.001036  |
| C  | 5.518908  | 3.541883  | 4.968696  |
| C  | 4.727791  | 6.212130  | -0.462699 |
| C  | 15.660448 | -6.227713 | 0.590193  |
| C  | 15.739325 | -1.500592 | -6.008180 |
| C  | 15.660401 | 6.227796  | -0.590090 |
| C  | 15.739029 | 1.500675  | 6.008281  |
| C  | 6.198787  | 1.379558  | 6.061150  |
| C  | 6.193415  | -6.226044 | 0.484736  |
| C  | 6.193371  | 6.225968  | -0.484841 |
| C  | 6.198784  | -1.379649 | -6.061265 |
| C  | 11.543585 | -6.241331 | 0.803887  |
| C  | 11.543544 | 6.241351  | -0.803909 |
| C  | 10.302030 | 6.245639  | -0.792154 |
| C  | 10.302071 | -6.245638 | 0.792102  |
| H  | 16.317125 | 4.668115  | -6.576535 |
| H  | 5.455049  | 4.795691  | -6.492158 |
| H  | 5.455053  | -4.795782 | 6.492051  |
| H  | 16.316890 | -4.668023 | 6.576665  |
| Ag | 13.553012 | 6.203917  | -0.743740 |
| Ag | 8.295184  | 6.214852  | -0.690695 |
| Ag | 8.295226  | -6.214887 | 0.690612  |
| Ag | 13.553054 | -6.203863 | 0.743773  |
| C  | 4.733342  | 1.366830  | 6.079285  |
| C  | 4.733338  | -1.366920 | -6.079381 |
| Ag | 2.629178  | 1.183206  | 6.121413  |
| Ag | 2.629174  | -1.183292 | -6.121486 |
| C  | 0.620800  | 1.112382  | 6.172138  |
| C  | 0.620796  | -1.112464 | -6.172186 |
| C  | -0.620795 | 1.112383  | 6.172144  |
| C  | -0.620800 | -1.112465 | -6.172178 |
| Ag | -2.629173 | 1.183221  | 6.121441  |
| Ag | -2.629178 | -1.183285 | -6.121454 |

**COF-BHC-1**

E=-1332.6362841

|    |            |           |           |
|----|------------|-----------|-----------|
| B  | 2.833100   | -5.023346 | -0.000135 |
| C  | 2.830009   | -2.450785 | -0.000055 |
| B  | -4.352551  | -2.518117 | -0.000154 |
| B  | -2.938165  | -1.700498 | -0.000083 |
| B  | -4.350318  | -4.151879 | 0.000021  |
| B  | -5.768567  | -1.703482 | -0.000131 |
| C  | -0.711417  | -0.411971 | 0.000012  |
| C  | -7.998696  | -0.420794 | -0.000111 |
| C  | 1.612362   | -1.688835 | 0.000066  |
| C  | 0.558940   | -1.082228 | 0.000095  |
| C  | 5.097826   | -1.076947 | -0.000226 |
| C  | 4.045773   | -1.685915 | -0.000137 |
| C  | 2.831527   | -3.750105 | -0.724044 |
| C  | 2.831641   | -3.750150 | 0.723851  |
| C  | -1.836029  | -1.062873 | -0.723952 |
| C  | -1.836117  | -1.062826 | 0.723877  |
| C  | -4.348726  | -5.425032 | 0.724115  |
| C  | -4.348653  | -5.425183 | -0.723804 |
| C  | -6.872430  | -1.068935 | -0.724042 |
| C  | -6.872427  | -1.068956 | 0.723793  |
| C  | -4.347336  | -6.724433 | 0.000299  |
| B  | 8.587448   | 4.971429  | -0.000097 |
| C  | 7.485427   | 4.333793  | 0.723919  |
| C  | 7.485260   | 4.333862  | -0.723921 |
| B  | -11.530153 | -6.674244 | -0.000101 |
| B  | -2.947242  | 4.957461  | -0.000059 |
| C  | -1.843465  | 4.322703  | -0.723933 |
| C  | -1.843591  | 4.322569  | 0.723885  |
| C  | -0.660425  | 1.023529  | -0.000062 |
| C  | -0.662277  | 2.239131  | -0.000149 |
| C  | 6.311730   | 1.031717  | -0.000237 |
| C  | 6.310008   | 2.247315  | 0.000032  |
| C  | 6.360777   | 3.682796  | 0.000101  |
| C  | -0.717363  | 3.674478  | 0.000016  |
| C  | 5.090339   | 4.352915  | 0.000295  |
| C  | 4.036863   | 4.959438  | 0.000443  |
| C  | 1.603498   | 4.956822  | 0.000310  |
| C  | 0.551476   | 4.347769  | 0.000187  |
| Tv | 14.365268  | 0.017165  | -0.000113 |
| Tv | 7.166702   | 12.446065 | -0.000046 |

**COF-BHC-2**

E=-2241.199233

|   |            |            |           |
|---|------------|------------|-----------|
| B | -19.403912 | -11.102114 | -0.000992 |
| B | -4.129051  | -2.368358  | 0.000399  |
| B | -7.808023  | -8.660821  | 0.000616  |
| B | -11.414511 | -2.338766  | -0.004150 |
| C | -7.791115  | -11.221774 | -0.002976 |
| C | -1.907482  | -1.093201  | 0.000076  |
| C | -13.614445 | -1.028383  | 0.002329  |
| B | -7.781031  | -4.455458  | -0.001729 |
| C | -9.077330  | -3.700224  | -0.005715 |
| C | -10.143548 | -3.083303  | -0.006671 |
| C | -7.792891  | -5.955821  | 0.000957  |
| C | -7.805109  | -7.187477  | 0.002381  |
| C | -6.476983  | -3.712833  | -0.000269 |
| C | -5.407558  | -3.101297  | 0.000205  |
| C | -12.499942 | -1.694975  | 0.730137  |
| C | -12.503880 | -1.694401  | -0.730464 |
| C | -3.033199  | -1.737379  | 0.730319  |
| C | -3.031841  | -1.740167  | -0.729920 |
| C | -7.804348  | -9.925968  | 0.728424  |
| C | -7.802919  | -9.923795  | -0.731999 |
| B | 3.915624   | -6.895974  | 0.013117  |
| C | 3.910287   | -4.335060  | 0.015000  |
| C | 3.912852   | -8.369445  | 0.009066  |
| C | 3.916545   | -5.632515  | 0.744312  |
| C | 3.916568   | -5.631288  | -0.716185 |
| C | -0.636158  | -1.754938  | 0.003053  |

|    |           |           |           |
|----|-----------|-----------|-----------|
| B  | -3.961055 | 6.874780  | -0.015794 |
| C  | -1.759451 | 5.565823  | -0.013581 |
| C  | -5.231013 | 7.621210  | -0.012715 |
| C  | -2.872906 | 6.231784  | 0.715415  |
| C  | -2.871861 | 6.231884  | -0.745026 |
| B  | 12.060158 | 6.902461  | 0.002349  |
| C  | 9.836621  | 5.630599  | 0.002914  |
| C  | 13.339351 | 7.634566  | 0.001183  |
| C  | 10.962819 | 6.274575  | 0.732739  |
| C  | 10.962209 | 6.274856  | -0.727306 |
| C  | -1.837347 | 0.338334  | -0.002868 |
| C  | 3.906415  | -9.601351 | 0.003530  |
| C  | -6.296217 | 8.240175  | -0.006453 |
| C  | 14.408284 | 8.247150  | -0.000067 |
| C  | -1.728488 | 4.133024  | -0.012174 |
| C  | -1.745756 | 2.907955  | -0.009398 |
| C  | -1.783460 | 1.562380  | -0.006098 |
| C  | -0.479293 | 6.210338  | -0.011963 |
| C  | 0.596144  | 6.797287  | -0.009405 |
| C  | 1.764507  | 7.465981  | -0.006317 |
| C  | 8.566016  | 6.293433  | 0.002363  |
| C  | 7.484667  | 6.869411  | 0.001208  |
| C  | 9.763946  | 4.199359  | 0.002614  |
| C  | 9.712312  | 2.975301  | 0.001410  |
| C  | 9.677403  | 1.629655  | 0.000674  |
| C  | 9.660739  | 0.404644  | 0.001756  |
| C  | 5.116641  | -3.561411 | 0.014424  |
| C  | 6.167697  | -2.931795 | 0.010772  |
| C  | 7.335465  | -2.262125 | 0.006835  |
| C  | 8.409785  | -1.673217 | 0.004716  |
| C  | 2.692138  | -3.580154 | 0.014040  |
| C  | 1.627447  | -2.974209 | 0.010635  |
| C  | 0.447772  | -2.325940 | 0.006642  |
| C  | 2.815479  | 8.095643  | -0.004694 |
| C  | 6.306031  | 7.519552  | 0.000160  |
| C  | 5.240200  | 8.123776  | -0.001843 |
| TV | 23.304288 | 0.000000  | 0.000000  |
| TV | 11.809999 | 20.095783 | 0.000000  |

**COF-BHC-3**

E= -3149.6659804

|   |            |            |           |
|---|------------|------------|-----------|
| B | -5.286442  | 8.833749   | -0.025579 |
| C | -3.062444  | 7.558479   | -0.024012 |
| C | -6.556299  | 9.570929   | -0.022692 |
| C | -4.189790  | 8.200693   | -0.755449 |
| C | -4.191079  | 8.199937   | 0.705266  |
| C | -7.625199  | 10.190241  | -0.017926 |
| C | -8.783921  | 10.859362  | -0.014552 |
| C | -9.856262  | 11.476860  | -0.013314 |
| B | 15.045968  | 8.820346   | 0.006446  |
| C | 12.836070  | 7.521206   | 0.007221  |
| C | 17.377814  | 10.187871  | 0.005340  |
| C | 16.311763  | 9.563885   | 0.005300  |
| C | 9.331775   | 9.443900   | 0.001761  |
| C | 8.271198   | 10.080866  | -0.000554 |
| C | 7.136216   | 10.788156  | -0.001501 |
| C | 6.101307   | 11.450517  | -0.001356 |
| C | 13.954786  | 8.178625   | -0.723461 |
| C | 13.955502  | 8.178329   | 0.737502  |
| C | 19.599936  | 11.489749  | 0.010033  |
| C | 18.532414  | 10.863905  | 0.007174  |
| C | 10.491012  | 8.776955   | 0.004768  |
| C | 11.563518  | 8.177251   | 0.007301  |
| C | 3.692038   | 11.453748  | -0.005060 |
| C | 2.652294   | 10.799038  | -0.009051 |
| C | 1.511813   | 10.101131  | -0.013018 |
| C | 0.445417   | 9.474047   | -0.016038 |
| C | -0.719260  | 8.817364   | -0.018876 |
| C | -1.797450  | 8.228220   | -0.021448 |
| B | -26.858149 | -15.734983 | -0.015750 |

|    |            |            |           |
|----|------------|------------|-----------|
| B  | -16.761578 | -2.993250  | -0.008785 |
| B  | -10.812095 | -13.165475 | -0.000434 |
| B  | -5.055263  | -2.962620  | -0.002492 |
| C  | -10.804899 | -15.729272 | -0.003420 |
| C  | -18.991656 | -1.728874  | -0.012665 |
| C  | -2.843588  | -1.666500  | -0.000748 |
| C  | -7.386573  | -4.331030  | -0.003539 |
| C  | -6.321572  | -3.705143  | -0.003296 |
| C  | -10.844968 | -10.461751 | 0.000241  |
| C  | -10.825383 | -11.697035 | 0.001493  |
| C  | -15.488798 | -3.725082  | -0.008894 |
| C  | -1.572170  | -2.324478  | 0.002153  |
| C  | -0.501153  | -2.926654  | 0.004602  |
| C  | 0.656692   | -3.595870  | 0.008573  |
| C  | -3.962058  | -2.323794  | -0.732065 |
| C  | -3.964821  | -2.321027  | 0.728887  |
| C  | -17.860410 | -2.367166  | -0.741636 |
| C  | -17.861525 | -2.364586  | 0.719118  |
| C  | -10.804397 | -14.430606 | -0.732018 |
| C  | -10.806738 | -14.432269 | 0.728646  |
| B  | 5.117326   | -8.933627  | 0.023451  |
| C  | 5.095480   | -6.369937  | 0.026302  |
| C  | 5.153318   | -11.637226 | 0.018783  |
| C  | 5.137047   | -10.401933 | 0.020590  |
| C  | 5.103494   | -7.666915  | -0.705131 |
| C  | 5.102385   | -7.668581  | 0.755554  |
| B  | -10.899346 | -6.389992  | -0.006108 |
| C  | -10.886401 | -7.886508  | -0.002722 |
| C  | -10.866780 | -9.123787  | -0.001581 |
| C  | -9.607978  | -5.633780  | -0.004359 |
| C  | -8.540326  | -5.008301  | -0.003858 |
| C  | 5.179309   | -14.212586 | 0.015689  |
| C  | 5.168304   | -12.975219 | 0.017282  |
| C  | 1.716564   | -4.234100  | 0.013765  |
| C  | 2.852147   | -4.940320  | 0.019606  |
| C  | 3.888792   | -5.599986  | 0.024569  |
| C  | -14.421761 | -4.347541  | -0.010168 |
| C  | -13.266231 | -5.022018  | -0.010841 |
| C  | -12.197191 | -5.645093  | -0.010922 |
| C  | 11.792147  | -2.375871  | 0.015580  |
| C  | 9.546406   | -3.616913  | 0.014652  |
| C  | 8.478701   | -4.241675  | 0.016483  |
| C  | 7.337694   | -4.938784  | 0.020604  |
| C  | 6.298062   | -5.593648  | 0.025305  |
| C  | 10.712712  | -2.962862  | 0.014743  |
| C  | -2.980986  | 6.129414   | -0.023244 |
| C  | -2.911707  | 4.902675   | -0.019399 |
| C  | -2.850809  | 3.566741   | -0.014664 |
| C  | 12.788965  | 6.090451   | 0.005675  |
| C  | 12.785655  | 4.861777   | 0.004535  |
| C  | 12.799976  | 3.524644   | 0.005105  |
| C  | -2.812773  | 2.330183   | -0.010181 |
| C  | -2.795931  | 0.992957   | -0.006209 |
| C  | -2.795147  | -0.235752  | -0.003249 |
| C  | 12.837791  | 2.288085   | 0.007673  |
| C  | 12.899579  | 0.952396   | 0.010940  |
| C  | 12.969920  | -0.274264  | 0.013553  |
| TV | 32.047262  | 0.025873   | 0.027948  |
| TV | 15.702624  | 27.954577  | 0.001864  |

**MOF-BHC-1**

E= -3902.3807209

|   |           |           |           |
|---|-----------|-----------|-----------|
| B | -5.634968 | 5.886730  | 0.591171  |
| B | -6.037215 | 2.093222  | -5.547362 |
| C | -5.614534 | 5.858603  | 3.174660  |
| H | -5.525053 | 6.776785  | 3.778779  |
| C | -6.086034 | -0.228307 | -6.677716 |

|   |           |           |           |    |           |           |           |
|---|-----------|-----------|-----------|----|-----------|-----------|-----------|
| H | -6.132830 | -0.347816 | -7.772754 | C  | -1.304304 | 1.035343  | -6.123719 |
| B | -5.805359 | 5.791093  | -3.592060 | C  | -1.335580 | -1.038393 | 6.118758  |
| C | -5.881621 | 4.480768  | -4.299153 | C  | -0.105667 | -0.823160 | 6.131373  |
| C | -5.946674 | 3.396571  | -4.885865 | C  | -0.074269 | 0.820548  | -6.129991 |
| C | -5.759959 | 5.839063  | -2.106891 | H  | -5.791595 | -6.818114 | 4.201202  |
| C | -5.714098 | 5.879436  | -0.871870 | H  | 4.188831  | -5.555589 | 5.768089  |
| C | -6.008241 | -1.437209 | -5.936990 | H  | 4.215378  | 5.555218  | -5.742254 |
| C | -5.913125 | -2.485002 | -5.306574 | H  | -5.774207 | 6.815376  | -4.227199 |
| C | -5.802332 | -3.625310 | -4.602121 | Ag | -3.286407 | -1.111849 | 6.124917  |
| C | -5.700612 | -4.657810 | -3.948155 | Ag | 1.751028  | -0.243069 | 6.174776  |
| C | -6.698746 | 0.957725  | -6.110348 | Ag | 1.782925  | 0.241366  | -6.163039 |
| C | -6.403617 | 5.989693  | 1.903666  | Ag | -3.255090 | 1.108763  | -6.138997 |
| B | -5.629248 | -5.889620 | -0.616484 | C  | 4.721027  | 6.251868  | 0.397989  |
| B | -6.064447 | -2.096079 | 5.519790  | C  | 4.726923  | -6.252038 | -0.369499 |
| C | -5.596387 | -5.861432 | -3.199849 | Ag | 6.710325  | 6.246018  | 0.243683  |
| H | -5.503908 | -6.779581 | -3.803572 | Ag | 6.715674  | -6.245865 | -0.208371 |
| C | -6.120622 | 0.225356  | 6.649976  | C  | 8.661193  | 6.232645  | 0.314732  |
| H | -6.173480 | 0.344826  | 7.744741  | C  | 8.666796  | -6.232100 | -0.272233 |
| B | -5.820162 | -5.793885 | 3.565857  | C  | 9.891227  | 6.199705  | 0.527104  |
| C | -5.900813 | -4.483556 | 4.272473  | C  | 9.897641  | -6.198776 | -0.479764 |
| C | -5.969595 | -3.399371 | 4.858789  | Ag | 11.747927 | 6.103207  | 1.100829  |
| C | -5.767349 | -5.841887 | 2.080942  | Ag | 11.756636 | -6.101776 | -1.045847 |
| C | -5.715500 | -5.882285 | 0.846149  | TV | 19.965676 | 0.002407  | 0.045639  |
| C | -6.039449 | 1.434321  | 5.909704  |    |           |           |           |
| C | -5.941339 | 2.482139  | 5.279794  |    |           |           |           |
| C | -5.827168 | 3.622474  | 4.575921  |    |           |           |           |
| C | -5.722324 | 4.654970  | 3.922438  |    |           |           |           |
| C | -6.729729 | -0.960994 | 6.079231  |    |           |           |           |
| C | -6.391494 | -5.992603 | -1.932709 |    |           |           |           |
| B | 3.938071  | 5.848445  | -0.850270 |    |           |           |           |
| B | 4.364265  | 0.652053  | -5.868515 |    |           |           |           |
| C | 3.870996  | 6.466952  | 1.656209  |    |           |           |           |
| H | 3.813716  | 7.511959  | 2.002920  |    |           |           |           |
| C | 4.388795  | -1.876315 | -6.400104 |    |           |           |           |
| H | 4.476504  | -2.268773 | -7.426861 |    |           |           |           |
| B | 4.186005  | 4.716808  | -4.876325 |    |           |           |           |
| C | 4.234931  | 3.276233  | -5.240109 |    |           |           |           |
| C | 4.282876  | 2.078811  | -5.545033 |    |           |           |           |
| C | 4.106936  | 5.130167  | -3.446084 |    |           |           |           |
| C | 4.037121  | 5.475449  | -2.262917 |    |           |           |           |
| C | 4.284406  | -2.865074 | -5.384636 |    |           |           |           |
| C | 4.180286  | -3.722873 | -4.514294 |    |           |           |           |
| C | 4.066002  | -4.652461 | -3.549033 |    |           |           |           |
| C | 3.967100  | -5.489688 | -2.658161 |    |           |           |           |
| C | 5.044100  | -0.591058 | -6.123085 |    |           |           |           |
| B | 3.937336  | -5.849159 | 0.874728  |    |           |           |           |
| B | 4.334297  | -0.652371 | 5.895081  |    |           |           |           |
| C | 3.883162  | -6.467646 | -1.632075 |    |           |           |           |
| H | 3.828385  | -7.512692 | -1.979068 |    |           |           |           |
| C | 4.354350  | 1.875985  | 6.426911  |    |           |           |           |
| H | 4.436069  | 2.268431  | 7.454167  |    |           |           |           |
| B | 4.163592  | -4.717231 | 4.901979  |    |           |           |           |
| C | 4.209846  | -3.276621 | 5.265968  |    |           |           |           |
| C | 4.255505  | -2.079167 | 5.571120  |    |           |           |           |
| C | 4.092264  | -5.130689 | 3.471356  |    |           |           |           |
| C | 4.028815  | -5.476049 | 2.287858  |    |           |           |           |
| C | 4.254991  | 2.864730  | 5.410926  |    |           |           |           |
| C | 4.155016  | 3.722474  | 4.540044  |    |           |           |           |
| C | 4.045244  | 4.651961  | 3.574162  |    |           |           |           |
| C | 3.950361  | 5.489068  | 2.682742  |    |           |           |           |
| C | 5.011968  | 0.591123  | 6.153526  |    |           |           |           |
| C | -5.244126 | 0.959563  | -6.195033 |    |           |           |           |
| C | -4.945605 | -5.865537 | -1.882999 |    |           |           |           |
| C | -5.275607 | -0.961950 | 6.171817  |    |           |           |           |
| C | -4.957484 | 5.862739  | 1.860962  |    |           |           |           |
| C | 3.267323  | 6.156342  | 0.374195  |    |           |           |           |
| C | 3.597687  | -0.608557 | -6.252508 |    |           |           |           |
| C | 3.564844  | 0.607759  | 6.274815  |    |           |           |           |
| C | 3.273023  | -6.157493 | -0.353115 |    |           |           |           |
